# Supplementary material for: Reactions of a Lewis acidic methylene phosphonium cationic adduct with olefins
Source: Royal Society of Chemistry journal article supplement (doi:10.1039/d2dt02855g), 2022-01-01
Supplement: d2dt02855g1.pdf [file d2dt02855g1.pdf]

## Supplementary Materials for

### Reactions of Lewis acidic methylene phosphonium dications with olefins

Linkun Miao, Amir Yeganeh-Salman, Jason Yeung, and Douglas W. Stephan\*

Correspondence to: dstephan@chem.utoronto.ca

#### Contents

|                                                                                                                                                        |    |
|--------------------------------------------------------------------------------------------------------------------------------------------------------|----|
| Materials and Methods .....                                                                                                                            | 3  |
| Preparation of $[\text{Ph}_2\text{PFCH}_3][\text{B}(\text{C}_6\text{F}_5)_4]$ (2a).....                                                                | 3  |
| Figure S1. $^1\text{H}$ NMR spectrum of 2a ( $\text{CDCl}_3$ ). .....                                                                                  | 4  |
| Figure S2. $^{13}\text{C}\{^1\text{H}\}$ NMR spectrum of 2a ( $\text{CDCl}_3$ ). .....                                                                 | 5  |
| Figure S3. $^{31}\text{P}\{^1\text{H}\}$ NMR spectrum of 2a ( $\text{CDCl}_3$ ). .....                                                                 | 6  |
| Figure S4. $^{19}\text{F}$ NMR spectrum of 2a ( $\text{CDCl}_3$ ). .....                                                                               | 7  |
| Figure S5. $^{11}\text{B}$ NMR spectrum of 2a ( $\text{CDCl}_3$ ). .....                                                                               | 8  |
| Preparation of $[\text{Ph}_2\text{PFCH}_3][\text{OTf}]$ (2b) .....                                                                                     | 8  |
| Figure S6. $^1\text{H}$ NMR spectrum of 2b ( $\text{CDCl}_3$ ). .....                                                                                  | 9  |
| Figure S7. $^{13}\text{C}\{^1\text{H}\}$ NMR spectrum of 2b ( $\text{CDCl}_3$ ). .....                                                                 | 10 |
| Figure S8. $^{31}\text{P}\{^1\text{H}\}$ NMR spectrum of 2b ( $\text{CDCl}_3$ ). .....                                                                 | 11 |
| Figure S9. $^{19}\text{F}$ NMR spectrum of 2b ( $\text{CDCl}_3$ ). .....                                                                               | 12 |
| Generation of $[\text{Ph}_2\text{FPC}(\text{H})\text{PPh}_2\text{CH}_3][\text{X}]$ ( $\text{X} = \text{B}(\text{C}_6\text{F}_5)_4, \text{OTf}$ ) ..... | 12 |
| Figure S10. $^1\text{H}$ NMR spectrum of the reaction mixture generating 3a ( $\text{CDCl}_3$ ). .....                                                 | 13 |
| Figure S11. $^{31}\text{P}\{^1\text{H}\}$ NMR spectrum of the reaction mixture generating 3a ( $\text{CDCl}_3$ ). .....                                | 14 |
| Figure S12. $^{19}\text{F}$ NMR spectrum of the reaction mixture generating 3a ( $\text{CDCl}_3$ ). .....                                              | 15 |
| Figure S13. $^{11}\text{B}$ NMR spectrum of the reaction mixture generating 3a ( $\text{CDCl}_3$ ). .....                                              | 16 |
| Figure S14. $^1\text{H}$ NMR spectrum of the reaction mixture generating 3b ( $\text{CDCl}_3$ ). .....                                                 | 17 |
| Figure S15. $^{31}\text{P}\{^1\text{H}\}$ NMR spectrum of the reaction mixture generating 3b ( $\text{CDCl}_3$ ). .....                                | 18 |
| Figure S16. $^{19}\text{F}$ NMR spectrum of the reaction mixture generating 3b ( $\text{CDCl}_3$ ). .....                                              | 19 |
| Reaction of $\text{Ph}_2\text{FPCH}_2$ with 2a .....                                                                                                   | 19 |
| Figure S17. $^1\text{H}$ NMR spectrum of reaction of $\text{Ph}_2\text{FPCH}_2$ with 2a ( $\text{CDCl}_3$ ). .....                                     | 20 |
| Figure S18. $^{31}\text{P}\{^1\text{H}\}$ NMR spectrum of reaction of $\text{Ph}_2\text{FPCH}_2$ with 2a ( $\text{CDCl}_3$ ). .....                    | 21 |
| Figure S19. $^{19}\text{F}$ NMR spectrum of reaction of $\text{Ph}_2\text{FPCH}_2$ with 2a ( $\text{CDCl}_3$ ). .....                                  | 22 |
| Preparation of $[\text{Ph}_2\text{PClCH}_3][\text{Cl}]$ (5) .....                                                                                      | 22 |
| Figure S20. $^1\text{H}$ NMR spectrum of 5 ( $\text{CDCl}_3$ ). .....                                                                                  | 23 |
| Figure S21. $^{13}\text{C}\{^1\text{H}\}$ NMR spectrum of 5 ( $\text{CDCl}_3$ ). .....                                                                 | 24 |
| Figure S22. $^{31}\text{P}\{^1\text{H}\}$ NMR spectrum of 5 ( $\text{CDCl}_3$ ). .....                                                                 | 25 |
| Preparation of $[\text{Ph}_2\text{CIPC}(\text{H})\text{PPh}_2\text{CH}_3][\text{Cl}]$ (6) .....                                                        | 25 |
| Figure S23. $^1\text{H}$ NMR spectrum of 6 ( $\text{CDCl}_3$ ). .....                                                                                  | 26 |
| Figure S24. $^{13}\text{C}\{^1\text{H}\}$ NMR spectrum of 6 ( $\text{CDCl}_3$ ). .....                                                                 | 27 |
| Figure S25. $^{31}\text{P}\{^1\text{H}\}$ NMR spectrum of 6 ( $\text{CDCl}_3$ ). .....                                                                 | 28 |
| Preparation of $[\text{Ph}_2(\text{OTf})\text{PC}(\text{H})\text{PPh}_2\text{CH}_3][\text{OTf}]$ (7) .....                                             | 28 |
| Figure S26. $^1\text{H}$ NMR spectrum of 7 ( $\text{C}_6\text{D}_5\text{Br}$ ). .....                                                                  | 29 |

|                                                                                                                                       |    |
|---------------------------------------------------------------------------------------------------------------------------------------|----|
| Figure S27. $^{13}\text{C}\{^1\text{H}\}$ NMR spectrum of 7 ( $\text{C}_6\text{D}_5\text{Br}$ ).....                                  | 30 |
| Figure S28. $^{31}\text{P}\{^1\text{H}\}$ NMR spectrum of 7 ( $\text{C}_6\text{D}_5\text{Br}$ ).....                                  | 31 |
| Figure S29. $^{19}\text{F}$ NMR spectrum of 7 ( $\text{C}_6\text{D}_5\text{Br}$ ).....                                                | 32 |
| Reaction of $\text{Et}_3\text{PO}$ with 7 (Gutmann-Beckett Lewis Acidity Test).....                                                   | 32 |
| Figure S30. $^{31}\text{P}\{^1\text{H}\}$ NMR spectrum of reaction of $\text{Et}_3\text{PO}$ with 7 ( $\text{CH}_2\text{Cl}_2$ )..... | 33 |
| Preparation of $[\text{Ph}_2(\text{DMAP})\text{PC}(\text{H})\text{PPh}_2\text{CH}_3][\text{OTf}]_2$ (9).....                          | 33 |
| Figure S31. $^1\text{H}$ NMR spectrum of 9 ( $\text{CDCl}_3$ ).....                                                                   | 34 |
| Figure S32. $^{13}\text{C}\{^1\text{H}\}$ NMR spectrum of 9 ( $\text{CDCl}_3$ ).....                                                  | 35 |
| Figure S33. $^{31}\text{P}\{^1\text{H}\}$ NMR spectrum of 9 ( $\text{CDCl}_3$ ).....                                                  | 36 |
| Figure S34. $^{19}\text{F}$ NMR spectrum of 9 ( $\text{CDCl}_3$ ).....                                                                | 37 |
| Reaction of 7 with 1,1-Diphenylethylene (10).....                                                                                     | 37 |
| Figure S35. $^1\text{H}$ NMR spectrum of 10 ( $\text{CDCl}_3$ ).....                                                                  | 38 |
| Figure S36. $^{13}\text{C}\{^1\text{H}\}$ NMR spectrum of 10 ( $\text{CDCl}_3$ ).....                                                 | 39 |
| Figure S37. $^{31}\text{P}\{^1\text{H}\}$ NMR spectrum of 10 ( $\text{CDCl}_3$ ).....                                                 | 40 |
| Figure S38. $^{19}\text{F}$ NMR spectrum of 10 ( $\text{CDCl}_3$ ).....                                                               | 41 |
| Reaction of 7 with $\alpha$ -Methylstyrene (11).....                                                                                  | 41 |
| Figure S39. $^1\text{H}$ NMR spectrum of the reaction of 7 with $\alpha$ -Methylstyrene ( $\text{CDCl}_3$ ).....                      | 42 |
| Figure S40. $^{13}\text{C}\{^1\text{H}\}$ NMR spectrum of the reaction of 7 with $\alpha$ -Methylstyrene ( $\text{CDCl}_3$ ).....     | 43 |
| Figure S41. $^{31}\text{P}\{^1\text{H}\}$ NMR spectrum of the reaction of 7 with $\alpha$ -Methylstyrene ( $\text{CDCl}_3$ ).....     | 44 |
| Figure S42. $^{19}\text{F}$ NMR spectrum of the reaction of 7 with $\alpha$ -Methylstyrene ( $\text{CDCl}_3$ ).....                   | 45 |
| Reaction of 7 with 2-Methylpropene (12).....                                                                                          | 45 |
| Figure S43. $^1\text{H}$ NMR spectrum of 12 ( $\text{CDCl}_3$ ).....                                                                  | 46 |
| Figure S44. $^{13}\text{C}\{^1\text{H}\}$ NMR spectrum of 12 ( $\text{CDCl}_3$ ).....                                                 | 47 |
| Figure S45. $^{31}\text{P}\{^1\text{H}\}$ NMR spectrum of 12 ( $\text{CDCl}_3$ ).....                                                 | 48 |
| Figure S46. $^{19}\text{F}$ NMR spectrum of 12 ( $\text{CDCl}_3$ ).....                                                               | 49 |

## Materials and Methods

**General considerations:** All manipulations were performed in a Glove box MB LABmaster produced by MBraun or using standard Schlenk techniques under an inert atmosphere of anhydrous N<sub>2</sub> unless otherwise mentioned. All glassware and Teflon-coated stir bars were oven-dried and cooled under vacuum before use. Dry, oxygen-free pentane, toluene and dichloromethane was prepared using an Innovative Technologies solvent purification system and stored over activated 4 Å molecular sieves before use. Commercial reagents were purchased from Sigma-Aldrich, Strem Chemicals, TCI Chemicals or Alfa Aesar, and were used without further purification unless indicated otherwise. Ph<sub>2</sub>PF<sub>2</sub>CH<sub>3</sub><sup>1</sup> and Ph<sub>2</sub>FPCH<sub>2</sub><sup>2</sup> were synthesized according to literature procedures. [Et<sub>3</sub>Si(HSiEt<sub>3</sub>)] [B(C<sub>6</sub>F<sub>5</sub>)<sub>4</sub>]<sup>-</sup> was prepared according to the method reported by Heinekey *et al.*<sup>3</sup> NMR spectra were obtained on a Bruker AvanceIII-400 MHz spectrometer or an Agilent DD2 500 MHz spectrometer. <sup>1</sup>H NMR data are reported relative to protio-solvent signals as follows: chemical shift (δ/ppm), coupling constant (Hz), normalized integrals. <sup>13</sup>C{<sup>1</sup>H} NMR chemical shifts (δ/ppm) are referenced relative to protio-solvent signals. <sup>31</sup>P{<sup>1</sup>H}, <sup>19</sup>F, and <sup>11</sup>B NMR chemical shifts (δ/ppm) are reported relative to H<sub>3</sub>PO<sub>4</sub>, CFCl<sub>3</sub>, and (Et<sub>2</sub>O)·BF<sub>3</sub> external standards. For compounds 7, 10-12, <sup>13</sup>C{<sup>1</sup>H} NMR resonance signals corresponding to OTf anions could not be explicitly identified due to low compound solubility. Repeated elemental analysis carried out on compounds 7-12 were found consistently low in carbon content,<sup>4</sup> thus not relied upon for characterization. X-ray data were collected on a Bruker Apex II diffractometer at 150(±2) K for all crystals.

### Preparation of [Ph<sub>2</sub>PFCH<sub>3</sub>][B(C<sub>6</sub>F<sub>5</sub>)<sub>4</sub>]<sup>-</sup> (2a)

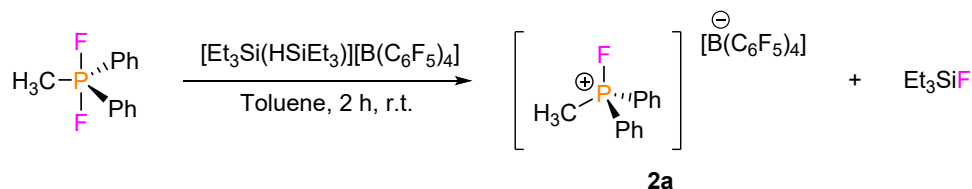

To a 20 mL scintillation vial containing a slurry of [Et<sub>3</sub>Si(HSiEt<sub>3</sub>)] [B(C<sub>6</sub>F<sub>5</sub>)<sub>4</sub>]<sup>-</sup> in 3 mL of toluene (0.302 g, 0.331 mmol, 1 equiv) was added a 3 mL toluene solution of Ph<sub>2</sub>PF<sub>2</sub>CH<sub>3</sub> (0.087 g, 0.37 mmol, 1.2 equiv). The resultant reaction mixture was stirred for 2 hours and allowed to settle. The clear colorless supernatant was decanted leaving an orange oil. With rapid stirring, 4 mL of pentane was added resulting in the precipitation of an off-white powder. After decantation of the supernatant, the residue was washed with 3x2 mL pentane and dried *in vacuo* affording [Ph<sub>2</sub>PFCH<sub>3</sub>][B(C<sub>6</sub>F<sub>5</sub>)<sub>4</sub>]<sup>-</sup> (**2a**) as an off-white powder (0.249 g, 0.277 mmol, 84% yield).

<sup>1</sup>H NMR (500 MHz, CDCl<sub>3</sub>, 298 K) δ 8.07 – 8.00 (m, 2H), 7.84 – 7.73 (m, 8H), 2.75 (dd, <sup>2</sup>J<sub>HP</sub> = 12.7 Hz, <sup>3</sup>J<sub>HF</sub> = 11.2 Hz, 3H).

<sup>13</sup>C{<sup>1</sup>H} NMR (126 MHz, CDCl<sub>3</sub>, 298 K) δ 148.2 (d, *J* = 243.9 Hz), 139.2 – 138.4 (m), 138.3 (d, *J* = 242.4 Hz), 136.2 (d, *J* = 242.9 Hz), 132.2 (dd, *J* = 13.3, 2.0 Hz), 131.2 (d, *J* = 14.4 Hz), 116.3 (dd, *J* = 106.2, 13.0 Hz), 11.4 (dd, *J* = 67.5, 12.2 Hz).

Resonance signal corresponding to  $i\text{-C}_6\text{F}_5$  could not be explicitly identified due to broadening and low compound solubility.

$^{31}\text{P}\{^1\text{H}\}$  NMR (162 MHz,  $\text{CDCl}_3$ , 298K)  $\delta$  107.0 (d,  $^1J_{\text{PF}} = 989$  Hz, 1P).

$^{19}\text{F}$  NMR (376 MHz,  $\text{CDCl}_3$ , 298 K)  $\delta$  -129.7 (dq,  $^1J_{\text{PF}} = 989$  Hz,  $^3J_{\text{HF}} = 11$  Hz, 1F), -132.2 – -133.2 (m, 8F), -162.8 (t,  $^3J_{\text{FF}} = 20.5$  Hz, 4F), -165.2 – -171.6 (m, 8F).

$^{11}\text{B}$  NMR (128 MHz,  $\text{CDCl}_3$ , 298 K):  $\delta$  -16.7 (s).

Elemental analysis calcd (%) for  $\text{C}_{37}\text{H}_{13}\text{BF}_{21}\text{P}$ : C 49.47, H 1.46; found: C 49.60, H 1.29.

**Figure S1.**  $^1\text{H}$  NMR spectrum of **2a** ( $\text{CDCl}_3$ ).

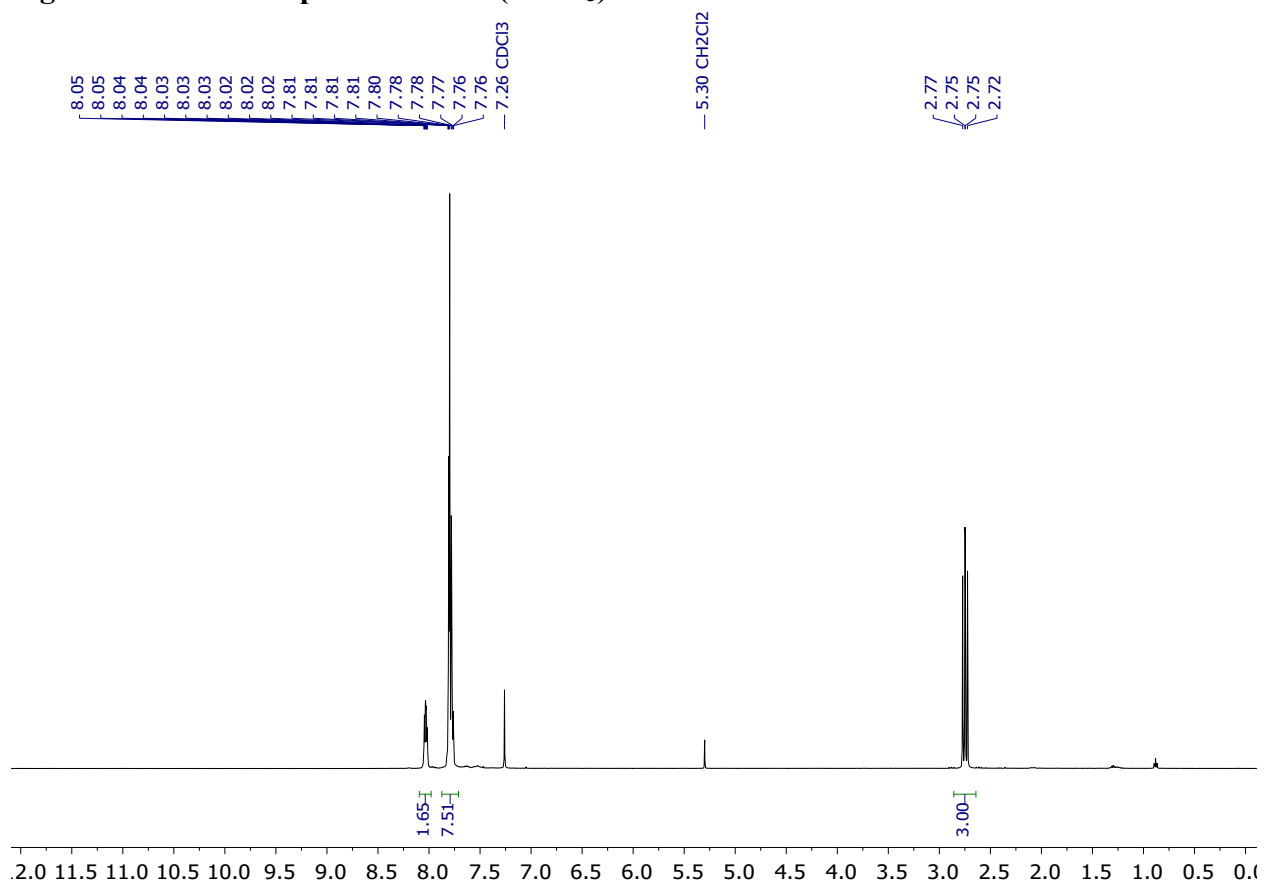

Figure S2.  $^{13}\text{C}\{^1\text{H}\}$  NMR spectrum of 2a ( $\text{CDCl}_3$ ).

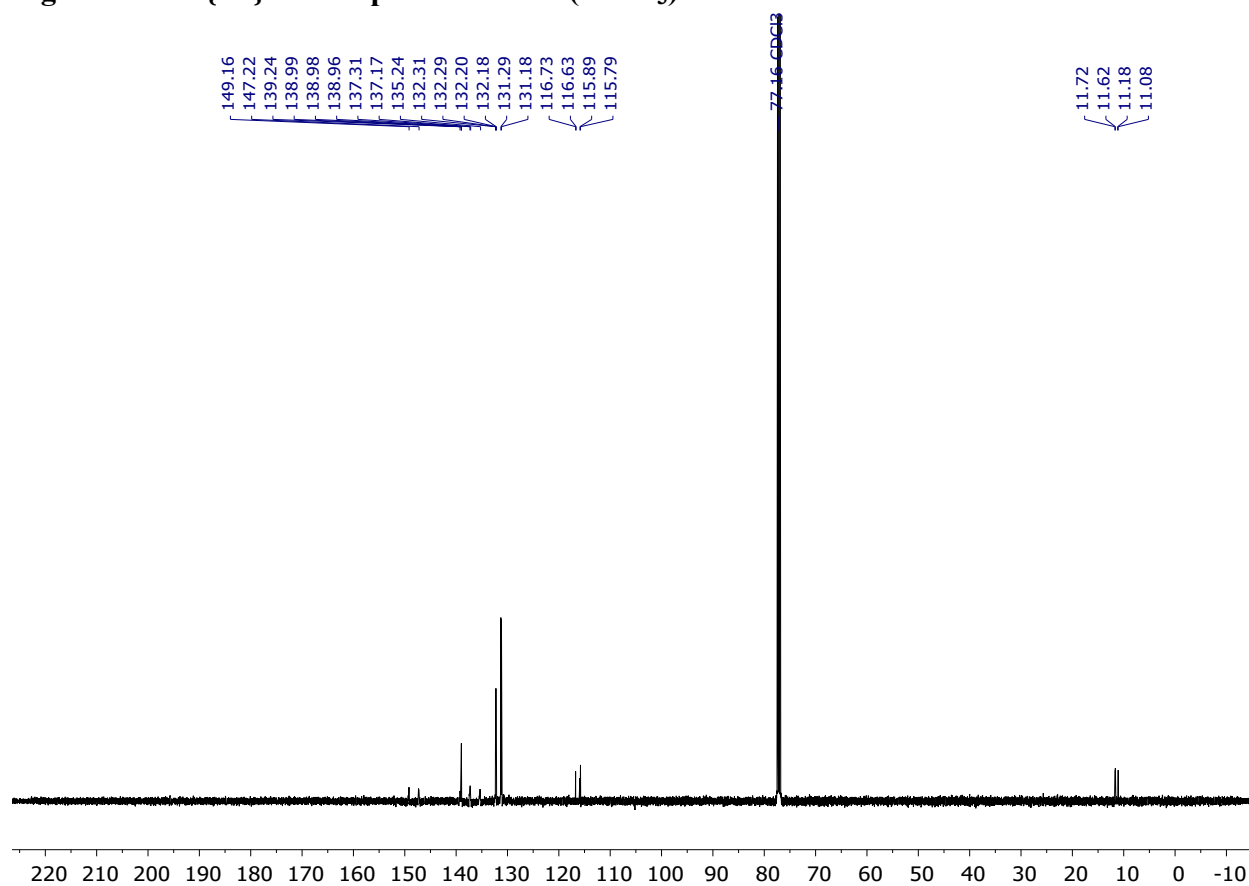

Figure S3.  $^{31}\text{P}\{^1\text{H}\}$  NMR spectrum of 2a ( $\text{CDCl}_3$ ).

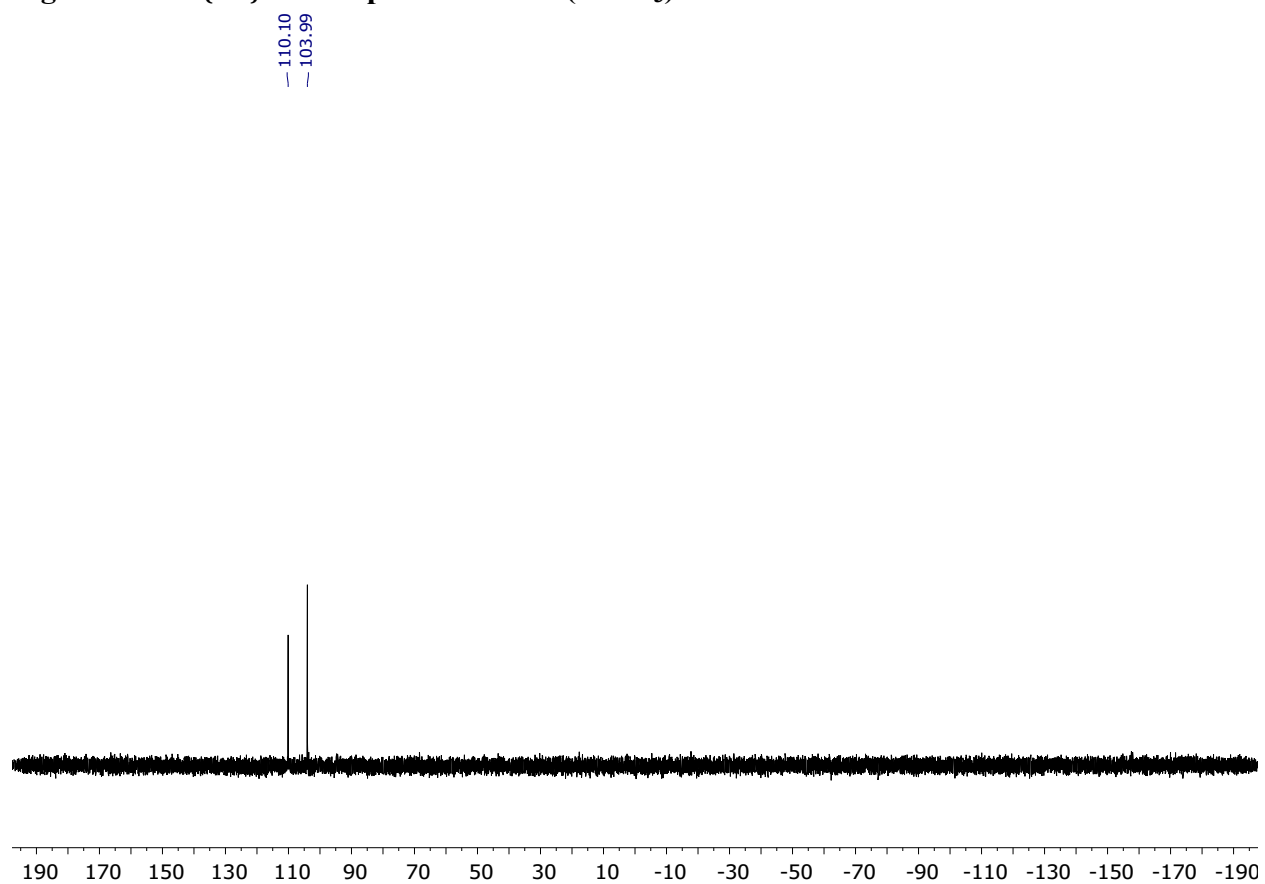

Figure S4.  $^{19}\text{F}$  NMR spectrum of 2a ( $\text{CDCl}_3$ ).

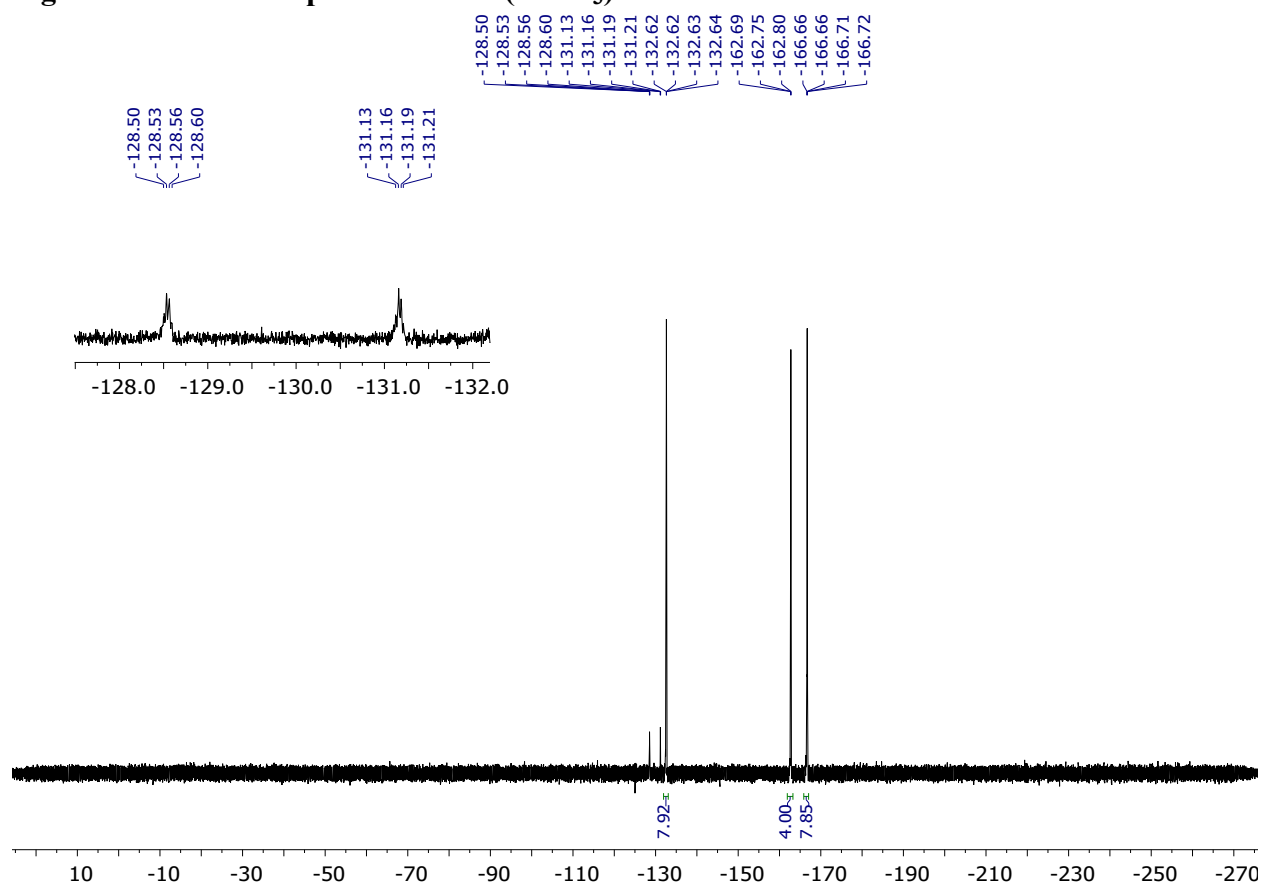

Figure S5.  $^{11}\text{B}$  NMR spectrum of **2a** ( $\text{CDCl}_3$ ).

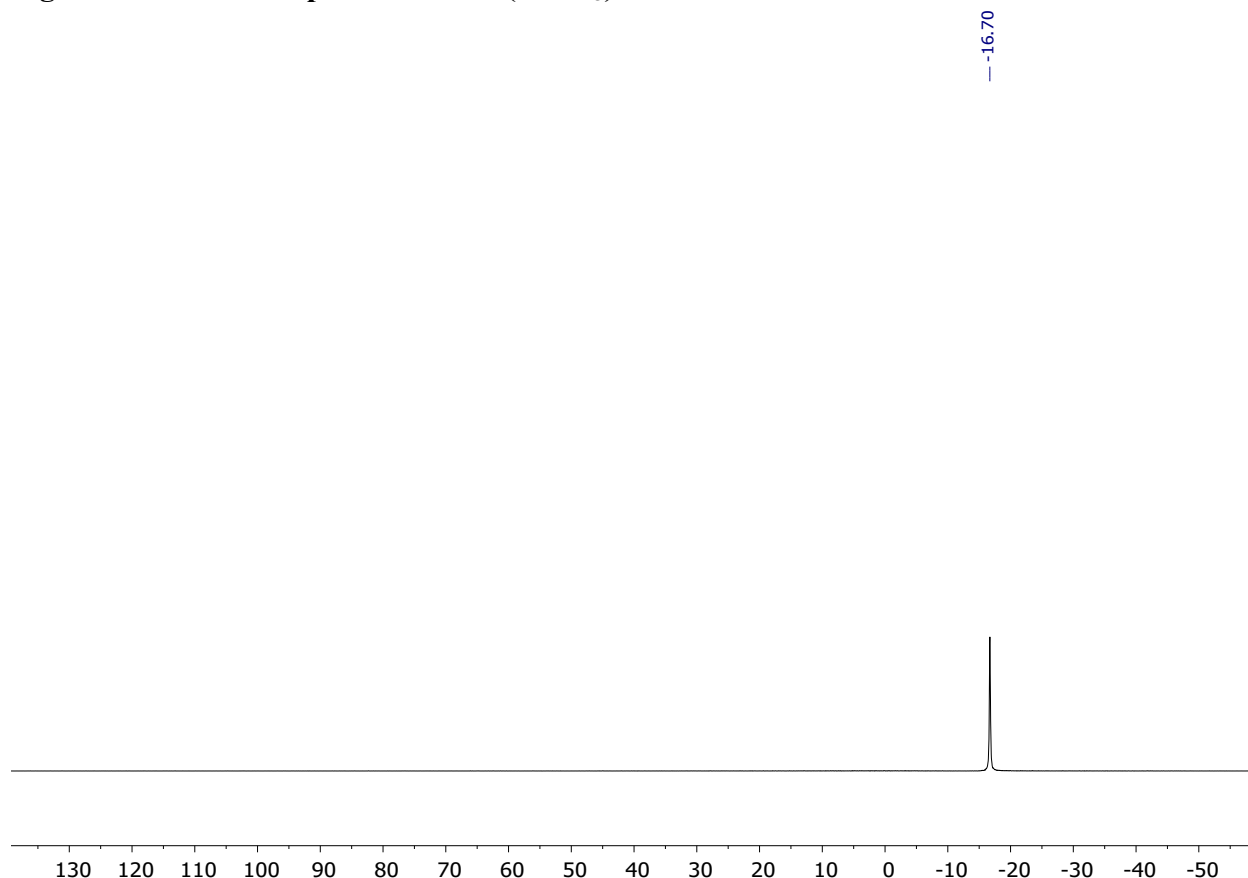

### Preparation of $[\text{Ph}_2\text{PFCH}_3][\text{OTf}]$ (**2b**)

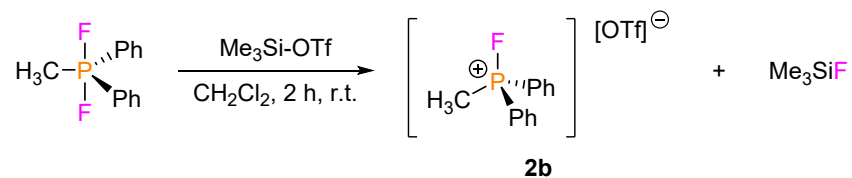

A 20 mL scintillation vial containing  $\text{Ph}_2\text{PF}_2\text{CH}_3$  (0.118 g, 0.495 mmol, 1 equiv) was taken up in 2 mL DCM and added  $\text{Me}_3\text{Si-OTf}$  dropwise via syringe (0.090 mL, 0.50 mmol, 1 equiv). The resultant reaction mixture was stirred for 2 hours before the solvent was removed *in vacuo*. The resultant residue was washed with 3x2 mL pentane to afford  $[\text{Ph}_2\text{PFCH}_3][\text{OTf}]$  (**2b**) as a colorless oil (0.155 g, 0.421 mmol, 85% yield).

$^1\text{H}$  NMR (400 MHz,  $\text{CDCl}_3$ , 298 K)  $\delta$  8.04 – 7.95 (m, 4H), 7.94 – 7.86 (m, 2H), 7.79 – 7.68 (m, 4H), 3.12 (dd,  $^2J_{\text{HP}} = 13.2$  Hz,  $^3J_{\text{HF}} = 12.1$  Hz, 3H).

$^{13}\text{C}\{^1\text{H}\}$  NMR (126 MHz,  $\text{CDCl}_3$ , 298 K)  $\delta$  137.6 (t,  $J = 2.2$  Hz), 132.9 (dd,  $J = 13.5, 2.1$  Hz), 130.5 (d,  $J = 14.3$  Hz), 120.6 (q,  $J = 320.2$  Hz), 117.9 (dd,  $J = 105.7, 13.0$  Hz), 11.4 (dd,  $J = 64.2, 10.2$  Hz).



$^{31}\text{P}\{^1\text{H}\}$  NMR (162 MHz,  $\text{CDCl}_3$ , 298K)  $\delta$  109.6 (d,  $^1J_{\text{PF}} = 976$  Hz, 1P).

$^{19}\text{F}$  NMR (376 MHz,  $\text{CDCl}_3$ , 298 K)  $\delta$  -78.4 (s, 3F), -131.3 (dq,  $^1J_{\text{FP}} = 976$ ,  $^3J_{\text{FH}} = 12$  Hz, 1F).

Figure S6.  $^1\text{H}$  NMR spectrum of 2b ( $\text{CDCl}_3$ ).

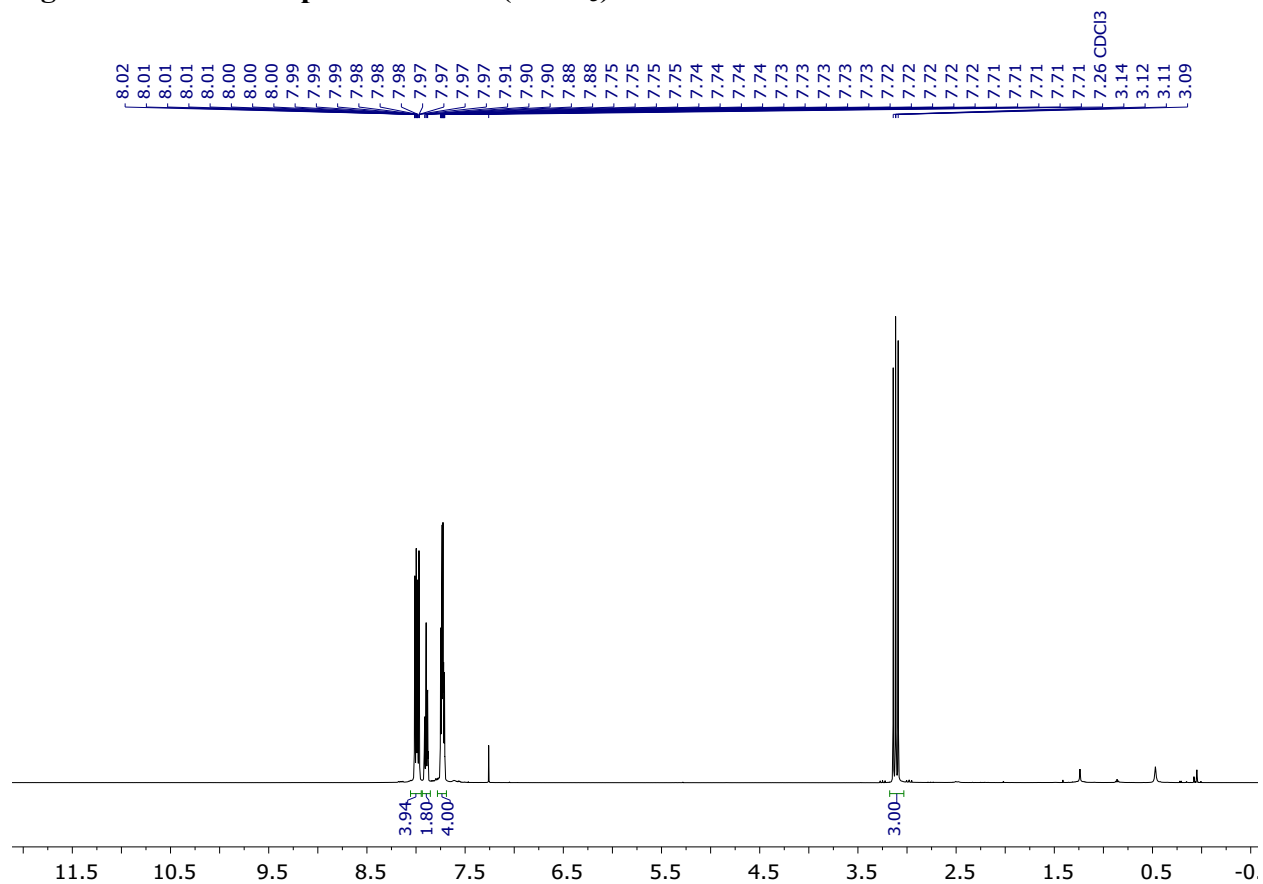

Figure S7.  $^{13}\text{C}\{^1\text{H}\}$  NMR spectrum of 2b ( $\text{CDCl}_3$ ).

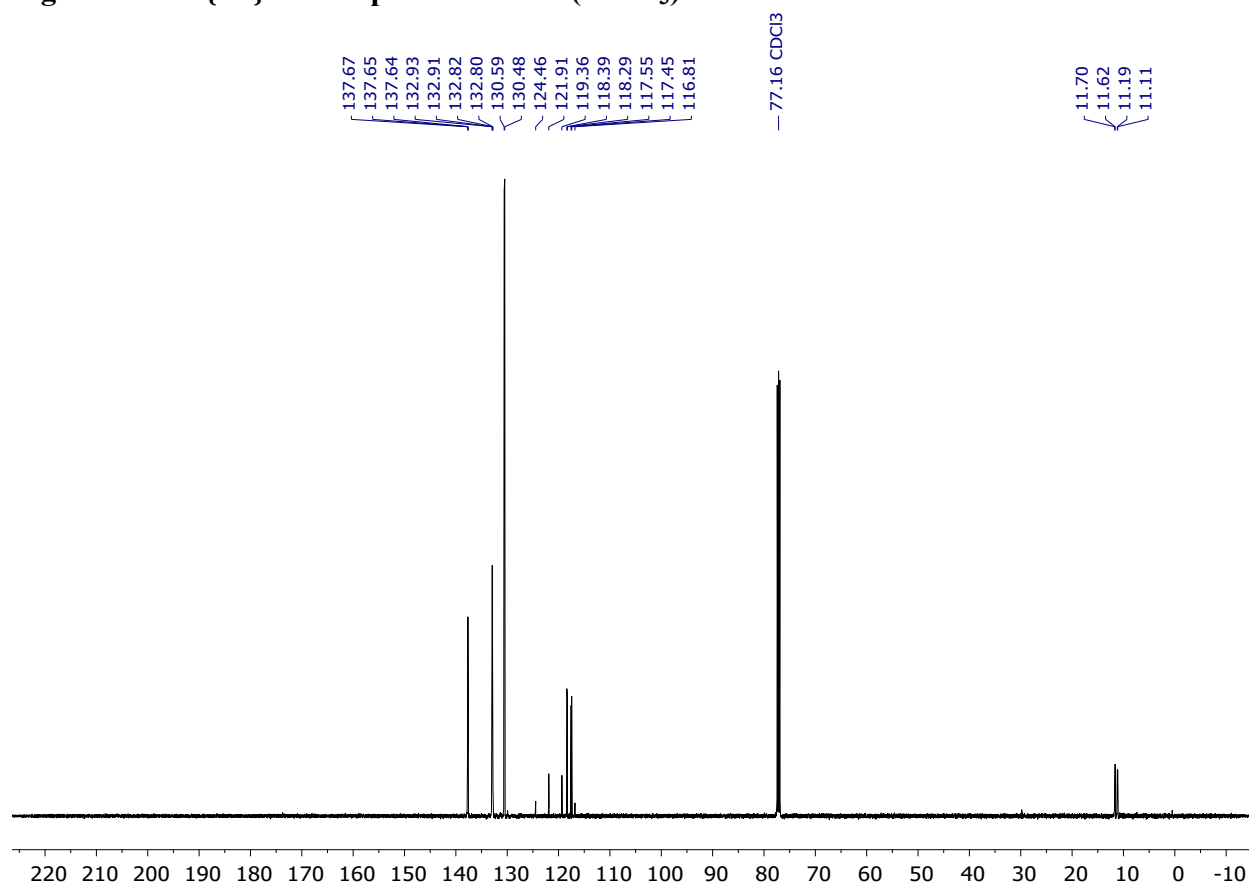

Figure S8.  $^{31}\text{P}\{^1\text{H}\}$  NMR spectrum of 2b ( $\text{CDCl}_3$ ).

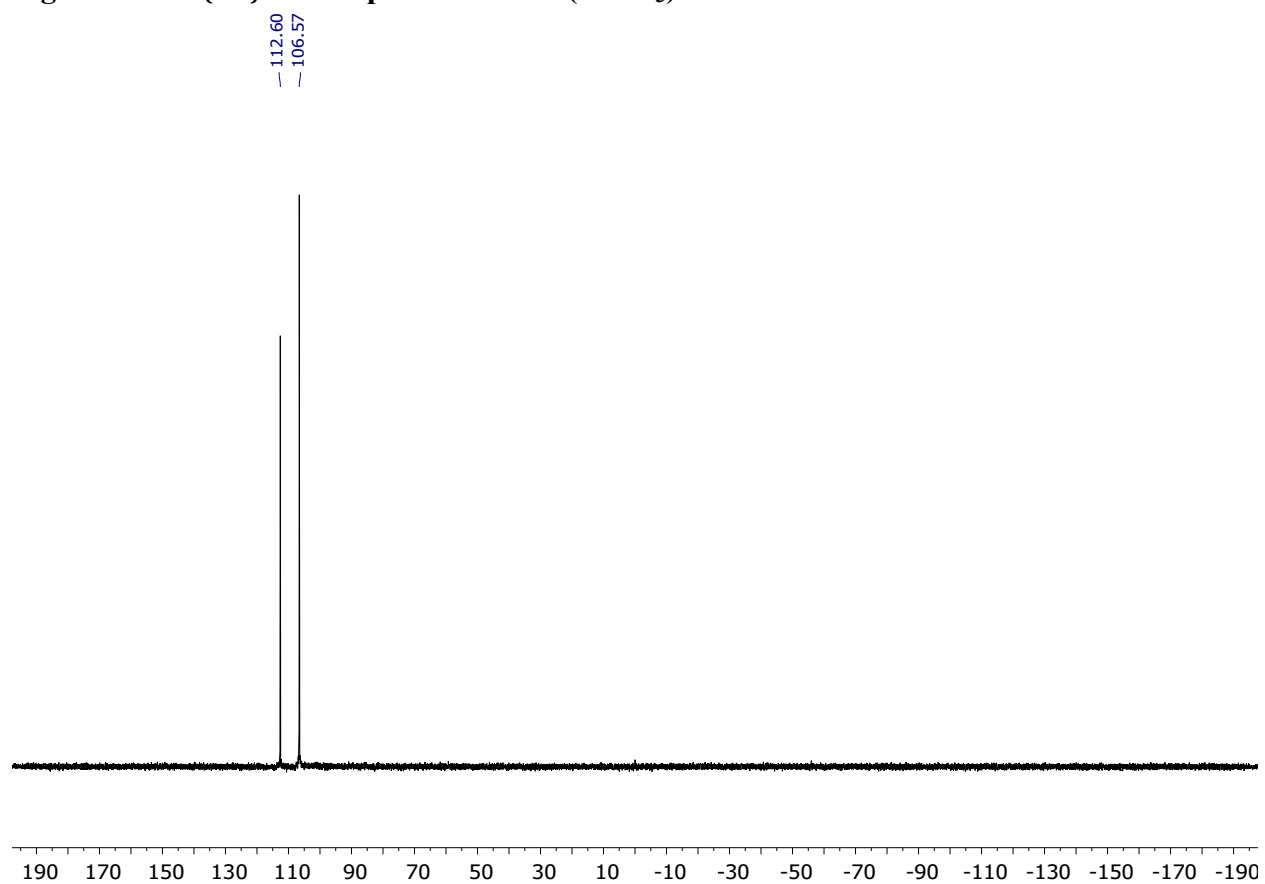

Figure S9.  $^{19}\text{F}$  NMR spectrum of **2b** ( $\text{CDCl}_3$ ).

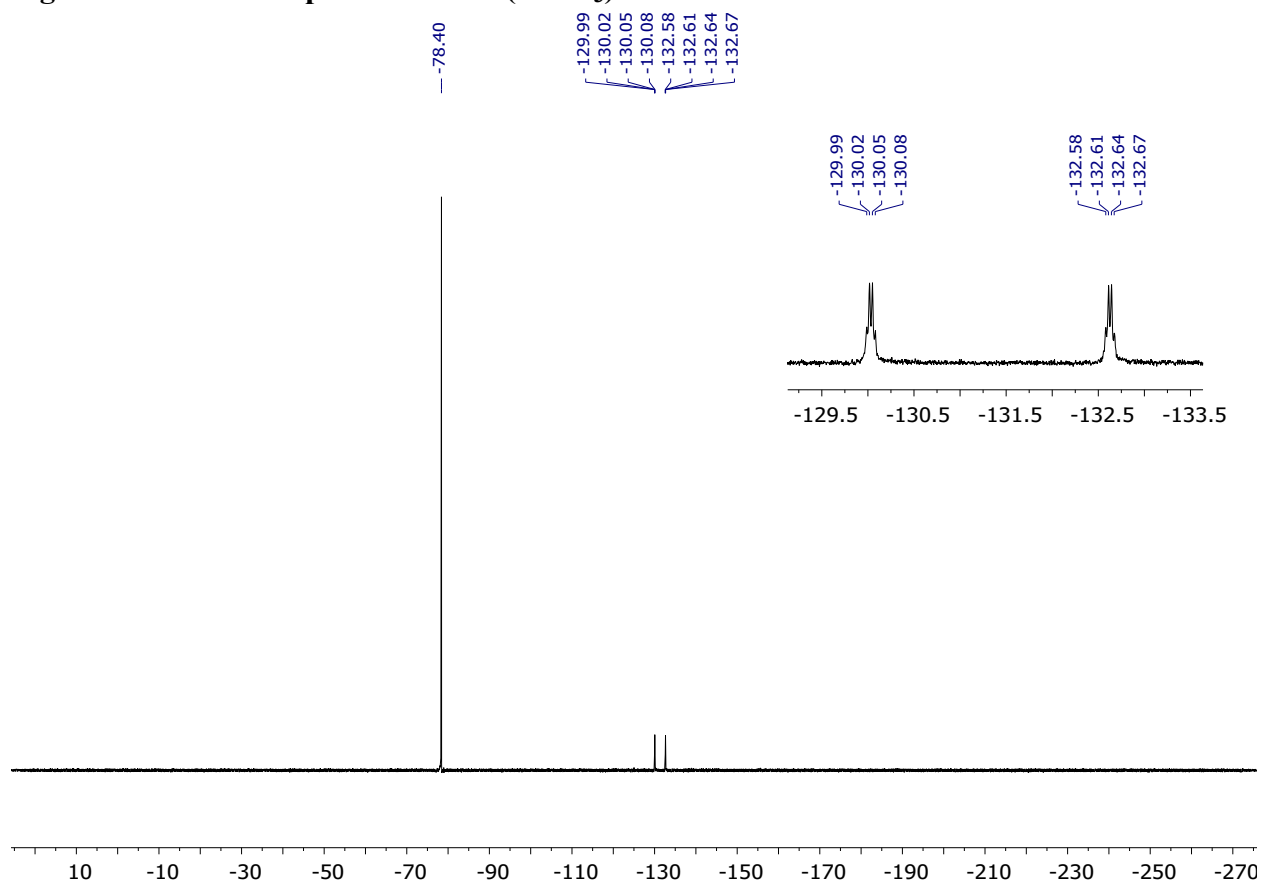

### Generation of $[\text{Ph}_2\text{FPC}(\text{H})\text{PPh}_2\text{CH}_3][\text{X}]$ ( $\text{X} = \text{B}(\text{C}_6\text{F}_5)_4, \text{OTf}$ )

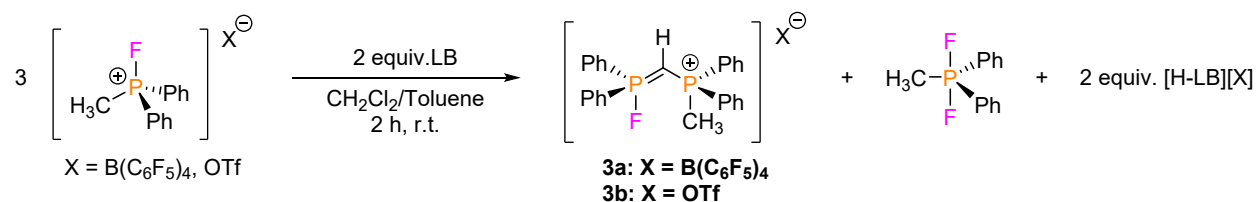

Method A: To a 20 mL scintillation vial containing a solution of **2a** in 3 mL of DCM (0.117 g, 0.130 mmol, 3 equiv) was added dropwise a 2 mL DCM solution of DMAP (0.0106 g, 0.0868 mmol, 2 equiv). The resultant homogeneous solution was stirred for 2 hours before the solvent was removed *in vacuo* affording an off-white oily residue.  $^1\text{H}$ ,  $^{31}\text{P}\{^1\text{H}\}$ , and  $^{19}\text{F}$  NMR analysis indicated the presence of **3a**,  $\text{Ph}_2\text{PF}_2\text{CH}_3$ , and  $[\text{H-DMAP}][\text{B}(\text{C}_6\text{F}_5)_4]$ . While  $\text{Ph}_2\text{PF}_2\text{CH}_3$  could be removed by washing with 3x2 mL pentane, **3a** and  $[\text{H-DMAP}][\text{B}(\text{C}_6\text{F}_5)_4]$  could not be explicitly separated due to similar solubility properties. Note: the same products were observed using **2b**, with the corresponding OTf counter anion.

**$^1\text{H}$  NMR** (400 MHz,  $\text{CDCl}_3$ , 298 K)  $\delta$  16.46 (s, 1H,  $[\text{H-DMAP}]^+$ ), 7.93 (br s, 2H, Ar-*H*), 6.65 (br s, 2H, Ar-*H*), 3.16 (s, 6H,  $\text{N}(\text{CH}_3)_2$ ), 2.79 – 2.69 (m, 1H,  $[\text{Ph}_2\text{FPC}(\text{H})\text{PPh}_2\text{CH}_3]^+$ ), 2.64 – 2.58 (m, 3H,  $\text{Ph}_2\text{PF}_2\text{CH}_3$ ), 2.02 (d,  $^2J_{\text{HP}} = 13.0$  Hz, 3H,  $[\text{Ph}_2\text{FPC}(\text{H})\text{PPh}_2\text{CH}_3]^+$ ).

**$^{31}\text{P}\{^1\text{H}\}$  NMR** (162 MHz,  $\text{CDCl}_3$ , 298K)  $\delta$  75.1 (dd,  $^1J_{\text{PF}} = 1031$  Hz,  $^2J_{\text{PP}} = 16$  Hz, 1P,  $[\text{Ph}_2\text{FPC}(\text{H})\text{PPh}_2\text{CH}_3]^+$ ), 17.2 (dd,  $^3J_{\text{PF}} = 24$  Hz,  $^2J_{\text{PP}} = 16$  Hz, 1P,  $[\text{Ph}_2\text{FPC}(\text{H})\text{PPh}_2\text{CH}_3]^+$ ), -40.1 (t,  $^1J_{\text{PF}} = 620$  Hz,  $\text{Ph}_2\text{PF}_2\text{CH}_3$ ).

**$^{19}\text{F}$  NMR** (376 MHz,  $\text{CDCl}_3$ , 298 K)  $\delta$  -27.8 (dq,  $^1J_{\text{FP}} = 620$  Hz,  $^3J_{\text{FH}} = 13$  Hz, 2F,  $\text{Ph}_2\text{PF}_2\text{CH}_3$ ), -88.0 (ddd,  $^1J_{\text{FP}} = 1031$  Hz,  $^3J_{\text{FP}} = 24$  Hz,  $^3J_{\text{FH}} = 9$  Hz, 1F,  $[\text{Ph}_2\text{FPC}(\text{H})\text{PPh}_2\text{CH}_3]^+$ ), -130.8 – -131.2 (br m, 8F, B(*o*- $\text{C}_6\text{F}_5$ )), -161.9 (t,  $^3J_{\text{FF}} = 21$  Hz, 4F, B(*p*- $\text{C}_6\text{F}_5$ )), -165.6 – -166.0 (br m, 8F, B(*m*- $\text{C}_6\text{F}_5$ )).

**$^{11}\text{B}$  NMR** (128 MHz,  $\text{CDCl}_3$ , 298 K):  $\delta$  -16.3 (s, B( $\text{C}_6\text{F}_5$ )<sub>4</sub>).

**Figure S10.**  $^1\text{H}$  NMR spectrum of the reaction mixture generating **3a** ( $\text{CDCl}_3$ ).

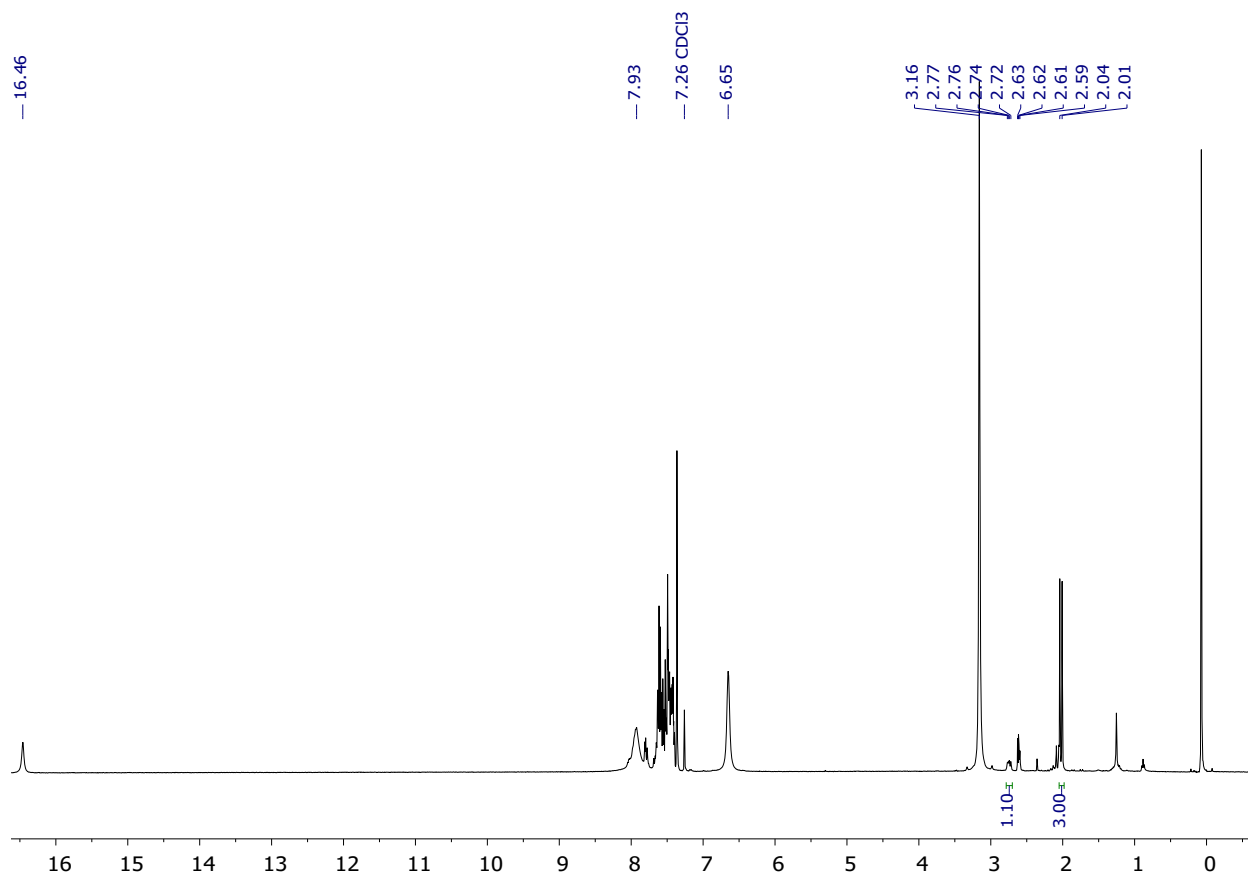

Figure S11.  $^{31}\text{P}\{^1\text{H}\}$  NMR spectrum of the reaction mixture generating 3a ( $\text{CDCl}_3$ ).

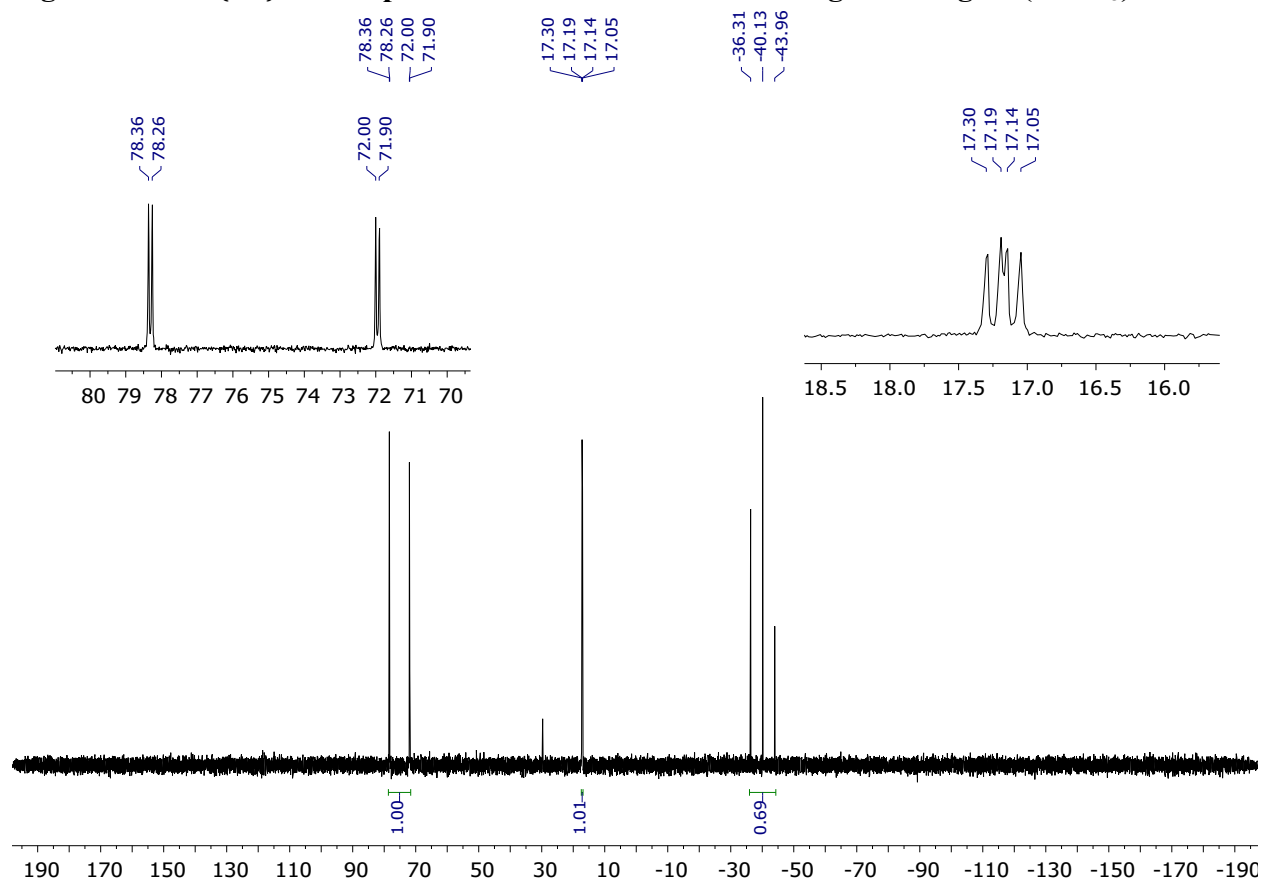

Figure S12.  $^{19}\text{F}$  NMR spectrum of the reaction mixture generating **3a** ( $\text{CDCl}_3$ ).

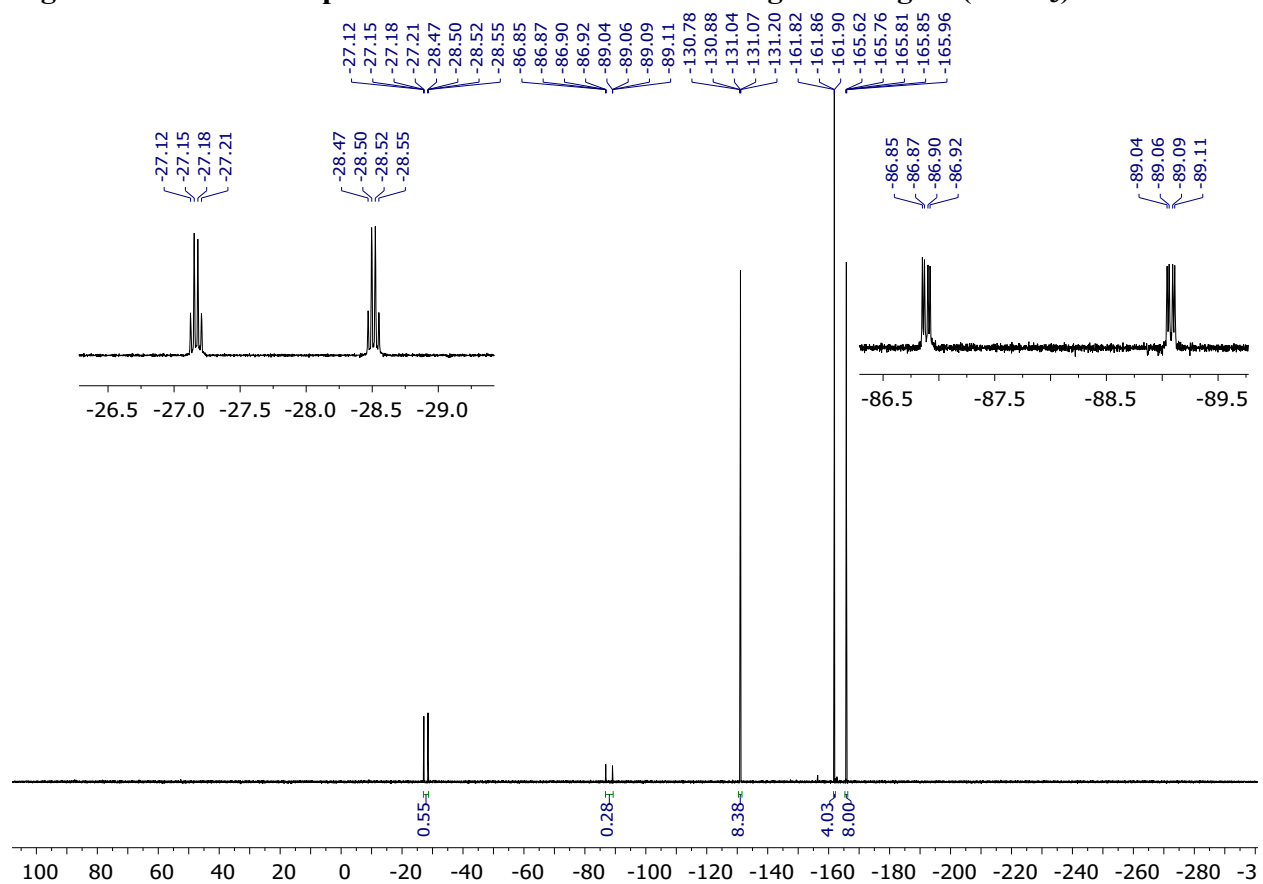

Figure S13.  $^{11}\text{B}$  NMR spectrum of the reaction mixture generating **3a** ( $\text{CDCl}_3$ ).

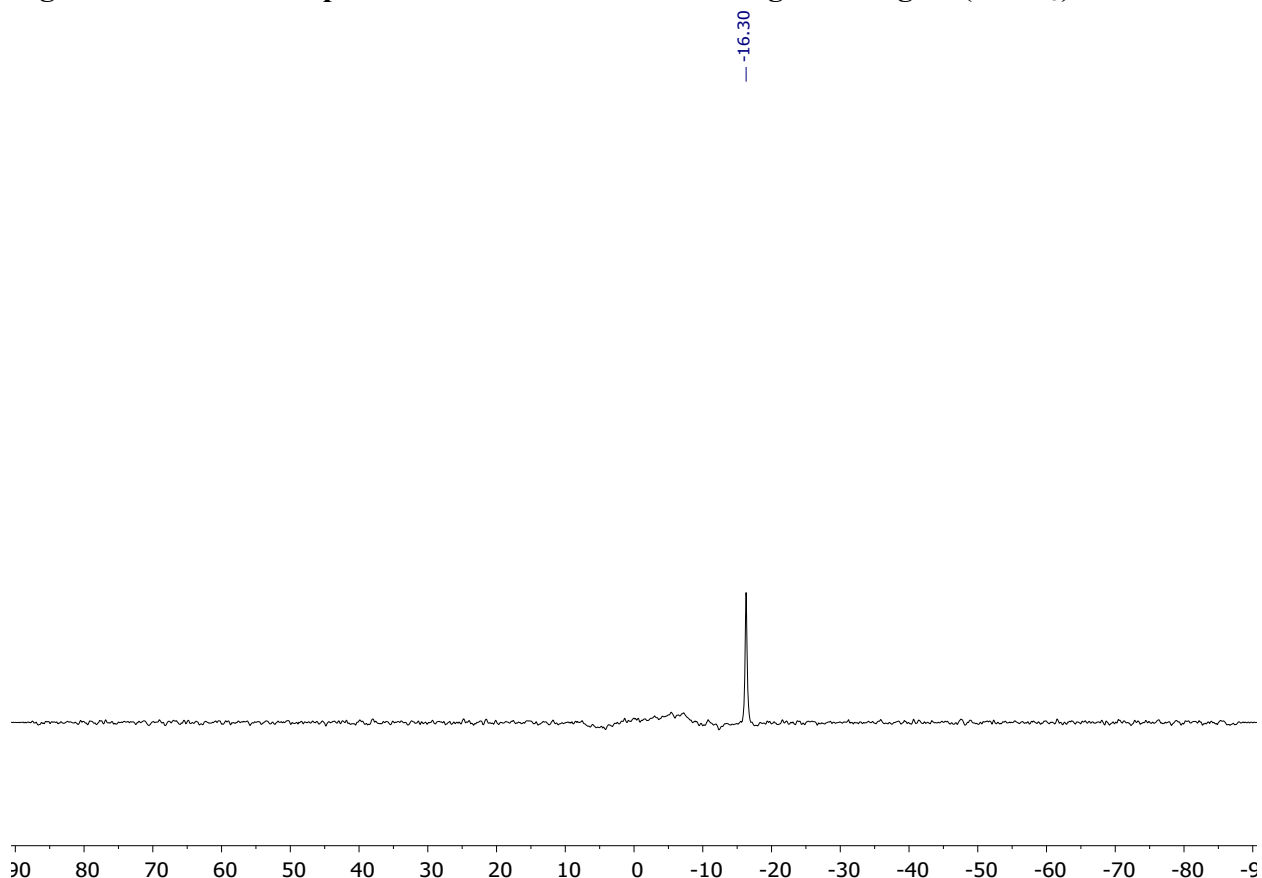

Method B: To a 20 mL scintillation vial charged with **2b** (0.0270 g, 0.0733 mmol, 3 equiv) was added 3 mL of toluene. To the resultant slurry, a 2 mL toluene solution of IDipp (0.0190 g, 0.0489 mmol, 2 equiv) was added and the mixture stirred for 2 hours. The solvent was then removed *in vacuo* affording an off-white residue.  $^1\text{H}$ ,  $^{31}\text{P}\{^1\text{H}\}$ , and  $^{19}\text{F}$  NMR analysis indicated presence of **3b**,  $\text{Ph}_2\text{PF}_2\text{CH}_3$  and  $[\text{H-IDipp}][\text{OTf}]$ .

Note: the same products were observed using **2a**, with the corresponding  $\text{B}[\text{C}_6\text{F}_5]_4$  counter anion; use of BAC and SIMes carbenes still led to the generation of the same three species as observed above, in addition to minor unidentified byproducts.

$^1\text{H}$  NMR (400 MHz,  $\text{CDCl}_3$ , 298 K)  $\delta$  9.16 (s, 1H,  $\text{NC}(\text{H})\text{N}$ ), 7.79 (s, 2H,  $\text{NCH}$ ), 7.57 (t,  $^3J_{\text{HH}} = 7.8$  Hz, 2H, *p*-ArH), 7.34 (d,  $^3J_{\text{HH}} = 7.8$  Hz, 4H, *m*-ArH), 2.91 – 2.82 (m, 1H,  $[\text{Ph}_2\text{FPC}(\text{H})\text{PPh}_2\text{CH}_3]^+$ ), 2.61 (br d,  $^2J_{\text{HP}} = 13.0$  Hz, 3H,  $\text{Ph}_2\text{PF}_2\text{CH}_3$ ), 2.39 (sept,  $^3J_{\text{HH}} = 6.8$  Hz, 4H,  $\text{CH}(\text{CH}_3)_2$ ), 1.99 (d,  $^2J_{\text{HP}} = 13.2$  Hz, 3H,  $[\text{Ph}_2\text{FPC}(\text{H})\text{PPh}_2\text{CH}_3]^+$ ), 1.26 (d,  $^3J_{\text{HH}} = 6.8$  Hz, 12H,  $\text{CH}(\text{CH}_3)_2$ ), 1.20 (d,  $^3J_{\text{HH}} = 6.8$  Hz, 12H,  $\text{CH}(\text{CH}_3)_2$ ).

$^{31}\text{P}\{^1\text{H}\}$  NMR (162 MHz,  $\text{CDCl}_3$ , 298K)  $\delta$  74.4 (dd,  $^1J_{\text{PF}} = 1030$  Hz,  $^2J_{\text{PP}} = 17$  Hz, 1P,  $[\text{Ph}_2\text{FPC}(\text{H})\text{PPh}_2\text{CH}_3]^+$ ), 16.8 (dd,  $^3J_{\text{PF}} = 24$  Hz,  $^2J_{\text{PP}} = 17$  Hz,  $[\text{Ph}_2\text{FPC}(\text{H})\text{PPh}_2\text{CH}_3]^+$ ), -42.4 (t,  $^1J_{\text{PF}} = 620$  Hz,  $\text{Ph}_2\text{PF}_2\text{CH}_3$ ).



$^{19}\text{F}$  NMR (376 MHz,  $\text{CDCl}_3$ , 298 K)  $\delta$  -28.2 (dq,  $^1J_{\text{FP}} = 620$  Hz,  $^3J_{\text{FH}} = 13$  Hz, 1F,  $\text{Ph}_2\text{PF}_2\text{CH}_3$ ), -79.0 (s,  $\text{OSO}_2\text{CF}_3$ ), -88.4 (ddd,  $^1J_{\text{FP}} = 1030$  Hz,  $^3J_{\text{FP}} = 24$  Hz,  $^3J_{\text{FH}} = 9$  Hz, 1F,  $[\text{Ph}_2\text{FPC}(\text{H})\text{PPh}_2\text{CH}_3]^+$ ).

Figure S14.  $^1\text{H}$  NMR spectrum of the reaction mixture generating 3b ( $\text{CDCl}_3$ ).

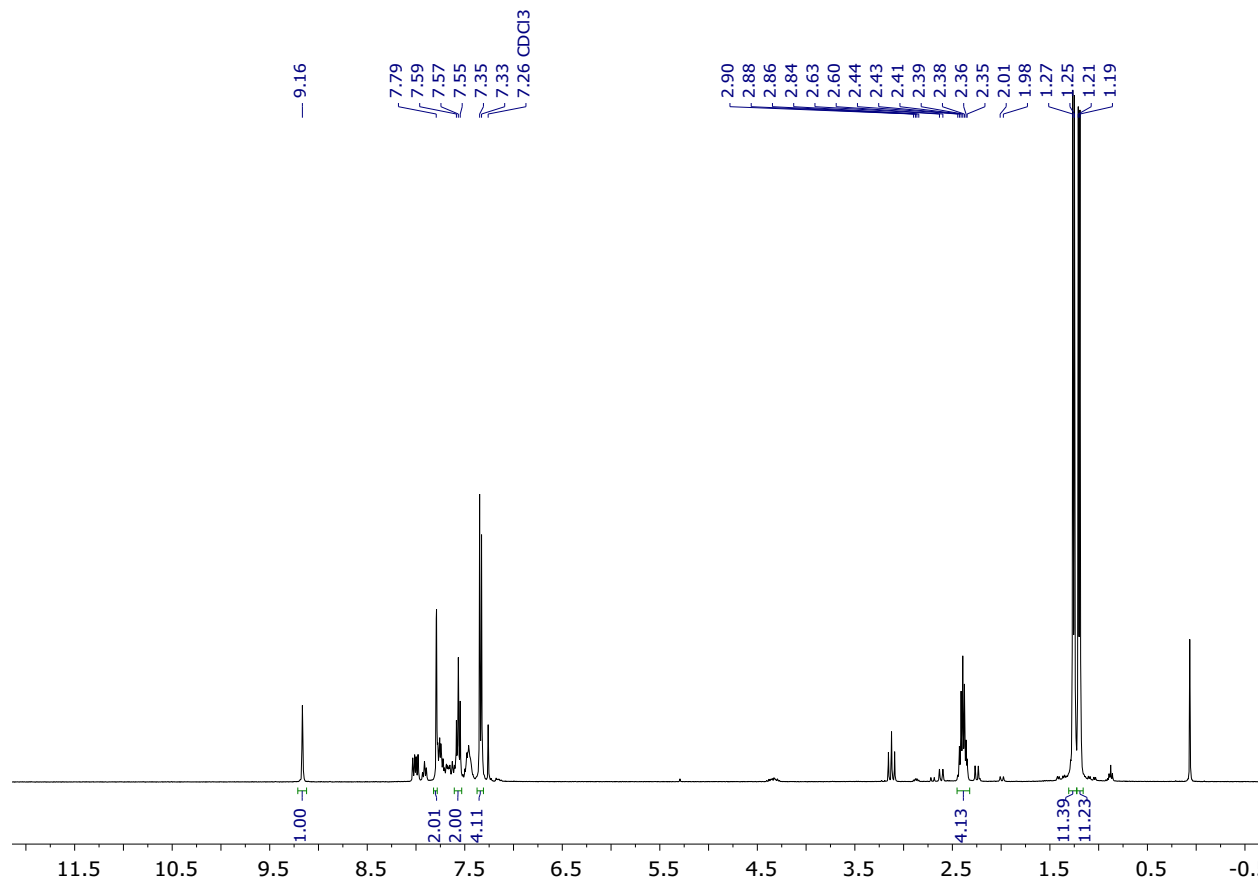

Figure S15.  $^{31}\text{P}\{^1\text{H}\}$  NMR spectrum of the reaction mixture generating 3b ( $\text{CDCl}_3$ ).

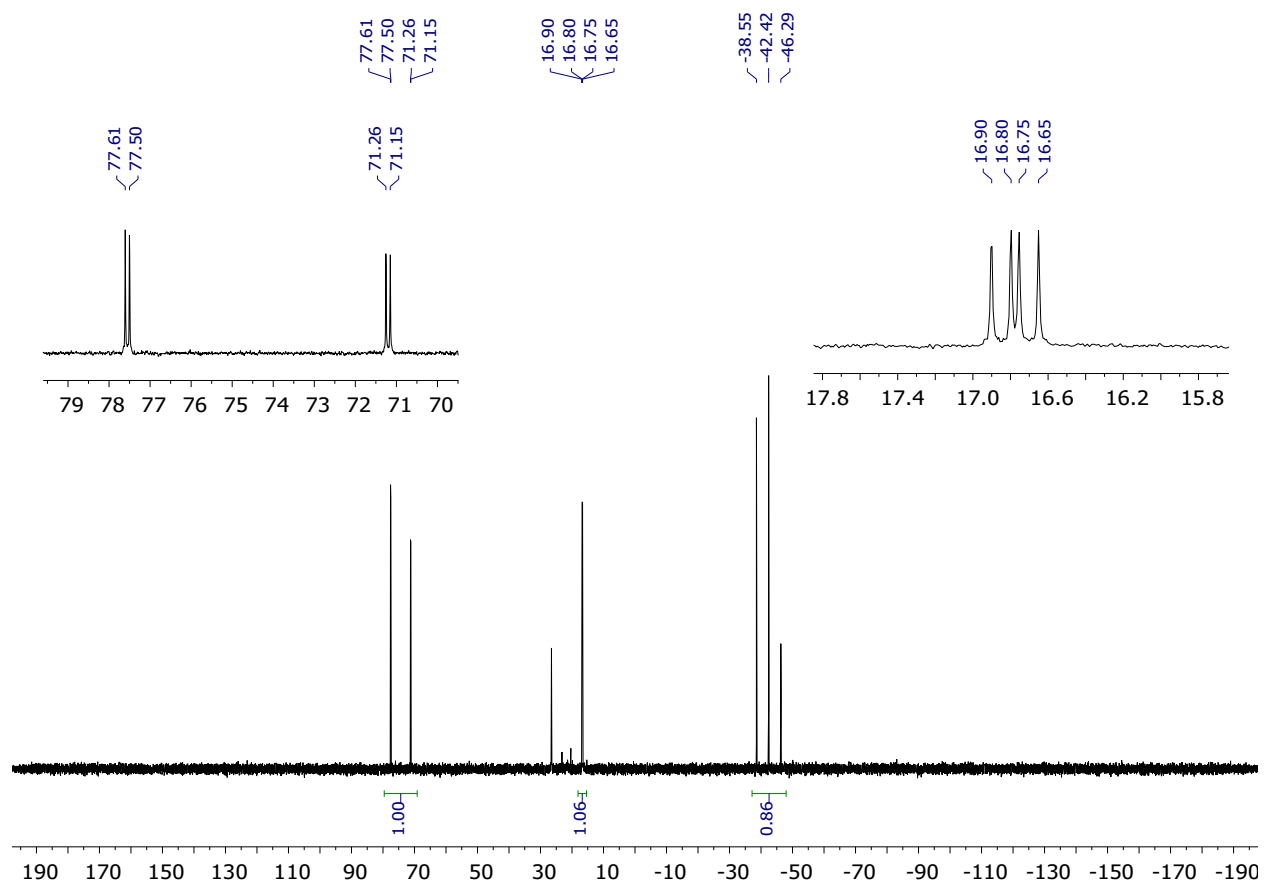

Figure S16.  $^{19}\text{F}$  NMR spectrum of the reaction mixture generating **3b** ( $\text{CDCl}_3$ ).

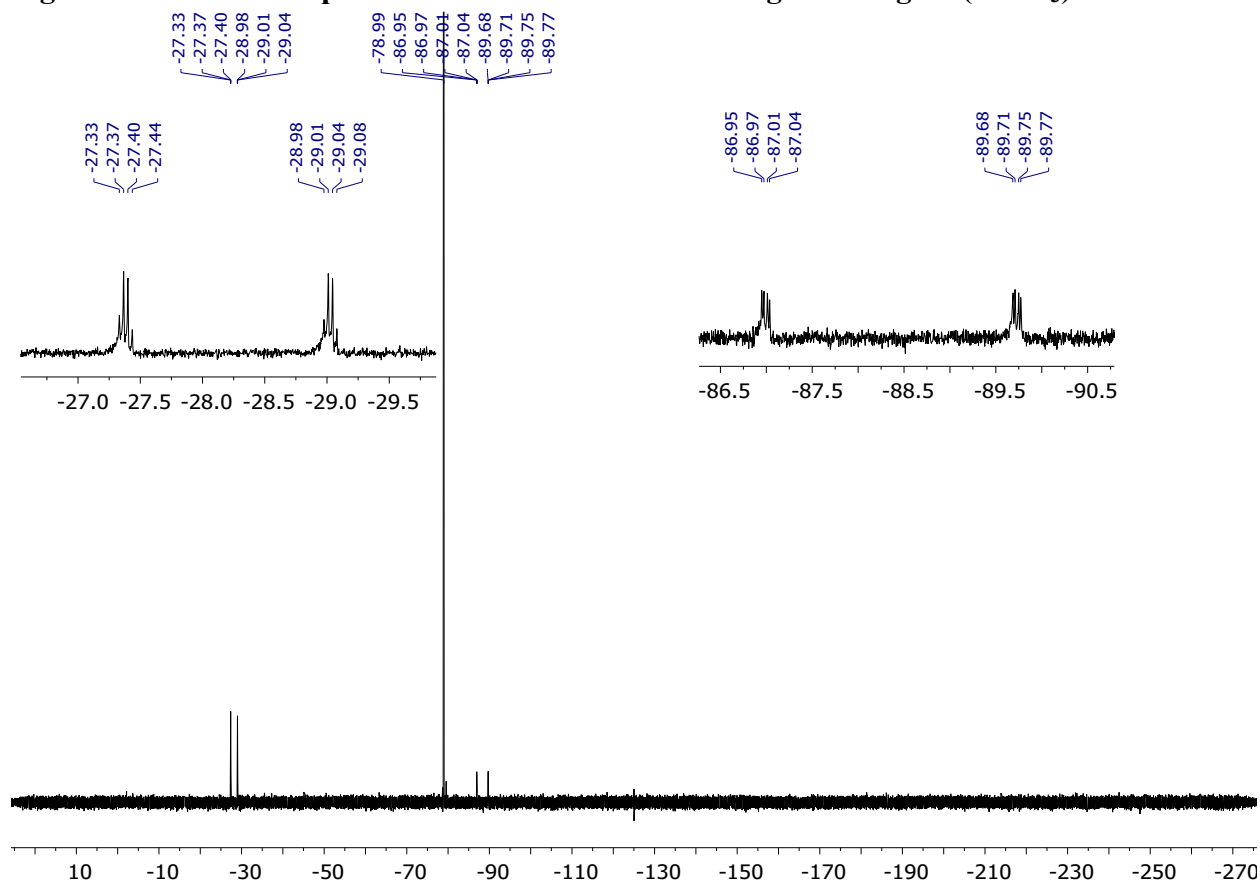

### Reaction of $\text{Ph}_2\text{FPCH}_2$ with **2a**

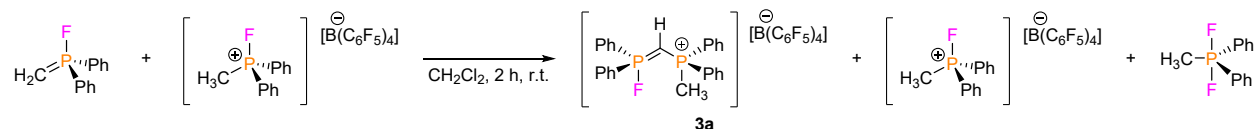

To a 20 mL scintillation vial containing a solution of **2a** (49.3 mg, 0.0550 mmol, 1 equiv) in 2 mL of DCM was added a 2 mL DCM solution of  $\text{Ph}_2\text{FPCH}_2$  (12.0 mg, 0.0550 mmol, 1 equiv) resulting in a clear colorless solution. The reaction was stirred for 2 hours before solvent was removed *in vacuo* affording a colorless residue. NMR analysis indicates the presence of three distinct chemical species identified as **3a**, **2a**, and  $\text{Ph}_2\text{PF}_2\text{CH}_3$ . The species  $\text{Ph}_2\text{PF}_2\text{CH}_3$  could be removed via 2x2 mL pentane wash, but similar solubility properties of **3a** and **2a** precludes their explicit isolation.

$^1\text{H}$  NMR (400 MHz,  $\text{CDCl}_3$ , 298 K)  $\delta$  8.06 – 7.97 (m, Ar-H), 7.82 – 7.74 (m, Ar-H), 7.68 – 7.33 (m, Ar-H), 2.75 (dd,  $^2J_{\text{HP}} = 12.7$  Hz,  $^3J_{\text{HF}} = 11.2$  Hz, 3H,  $[\text{Ph}_2\text{PFCH}_3]^+$ ), 2.67 – 2.56 (m, 1H,  $[\text{Ph}_2\text{FPC}(\text{H})\text{PPh}_2\text{CH}_3]^+$ ), 2.44 – 2.33 (m, 3H,  $\text{Ph}_2\text{PF}_2\text{CH}_3$ ), 2.03 (d,  $^2J_{\text{HP}} = 13.1$  Hz, 3H,  $[\text{Ph}_2\text{FPC}(\text{H})\text{PPh}_2\text{CH}_3]^+$ ).

$^{31}\text{P}\{^1\text{H}\}$  NMR (162 MHz,  $\text{CDCl}_3$ , 298K)  $\delta$  107.4 (d,  $^1J_{\text{PF}} = 990$  Hz, 1P,  $[\text{Ph}_2\text{PFCH}_3]^+$ ), 75.4 (dd,  $^1J_{\text{PF}} = 1031$  Hz,  $^2J_{\text{PP}} = 16$  Hz, 1P,  $[\text{Ph}_2\text{FPC}(\text{H})\text{PPh}_2\text{CH}_3]^+$ ), 16.8 (dd,  $^3J_{\text{PF}} = 23$  Hz,  $^2J_{\text{PP}} = 16$  Hz, 1P,  $[\text{Ph}_2\text{FPC}(\text{H})\text{PPh}_2\text{CH}_3]^+$ ), -40.1 (t,  $^1J_{\text{PF}} = 616$  Hz,  $\text{Ph}_2\text{PF}_2\text{CH}_3$ ).

$^{19}\text{F}$  NMR (376 MHz,  $\text{CDCl}_3$ , 298 K)  $\delta$  -26.4 (br d,  $^1J_{\text{FP}} = 616$  Hz,  $\text{Ph}_2\text{PF}_2\text{CH}_3$ ), -87.0 (ddd,  $^1J_{\text{FP}} = 1031$  Hz,  $^3J_{\text{FP}} = 23$  Hz,  $^3J_{\text{FH}} = 9$  Hz,  $[\text{Ph}_2\text{FPC}(\text{H})\text{PPh}_2\text{CH}_3]^+$ ), -128.3 (br d,  $^1J_{\text{FP}} = 990$  Hz,  $[\text{Ph}_2\text{PFCH}_3]^+$ ), -131.1 – -131.8 (br m, 8F, B(*o*- $\text{C}_6\text{F}_5$ )), -161.9 (t,  $^3J_{\text{FF}} = 20$  Hz, 4F, B(*p*- $\text{C}_6\text{F}_5$ )), -165.4 – -166.2 (br m, 8F, B(*m*- $\text{C}_6\text{F}_5$ )).

Figure S17.  $^1\text{H}$  NMR spectrum of reaction of  $\text{Ph}_2\text{FPCH}_2$  with 2a ( $\text{CDCl}_3$ ).

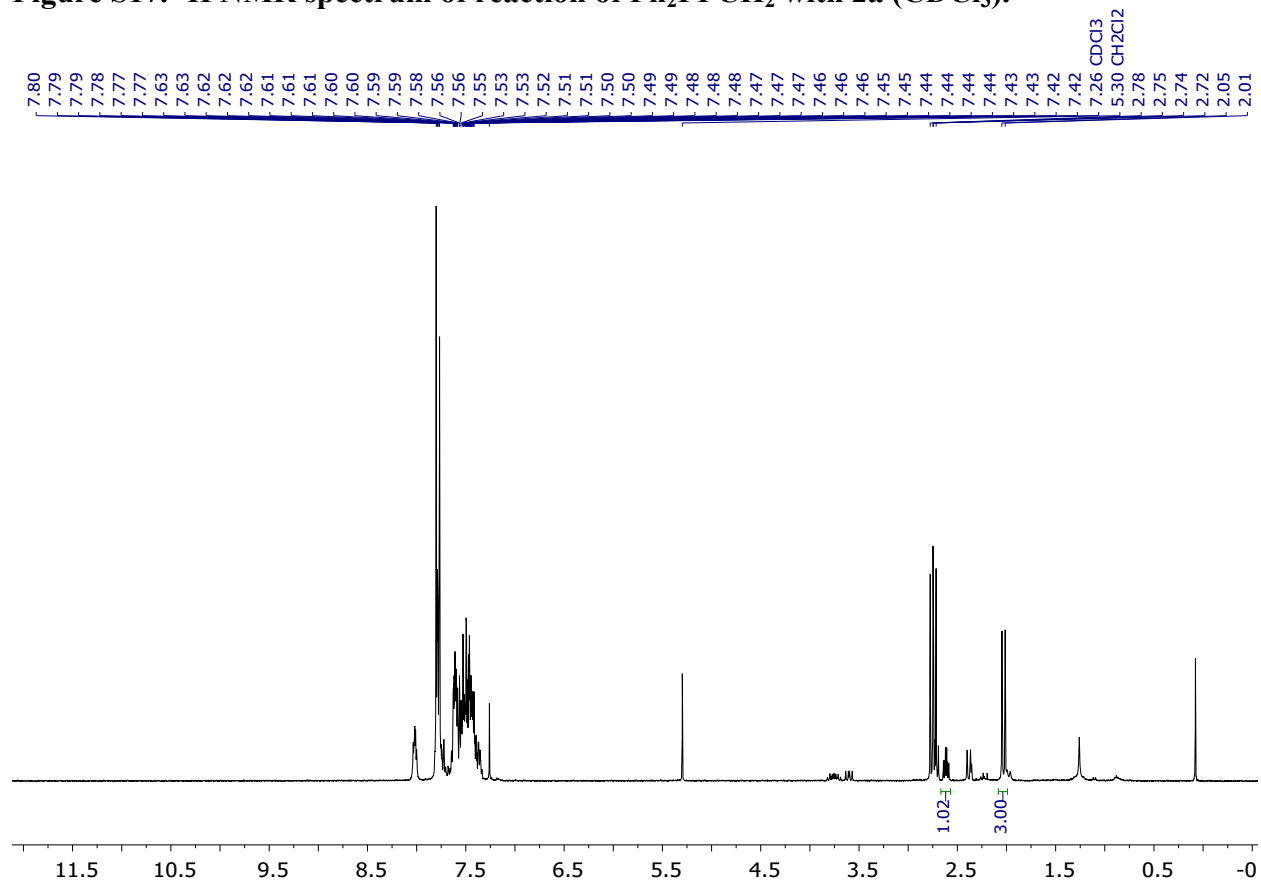

Figure S18.  $^{31}\text{P}\{^1\text{H}\}$  NMR spectrum of reaction of  $\text{Ph}_2\text{FPCH}_2$  with 2a ( $\text{CDCl}_3$ ).

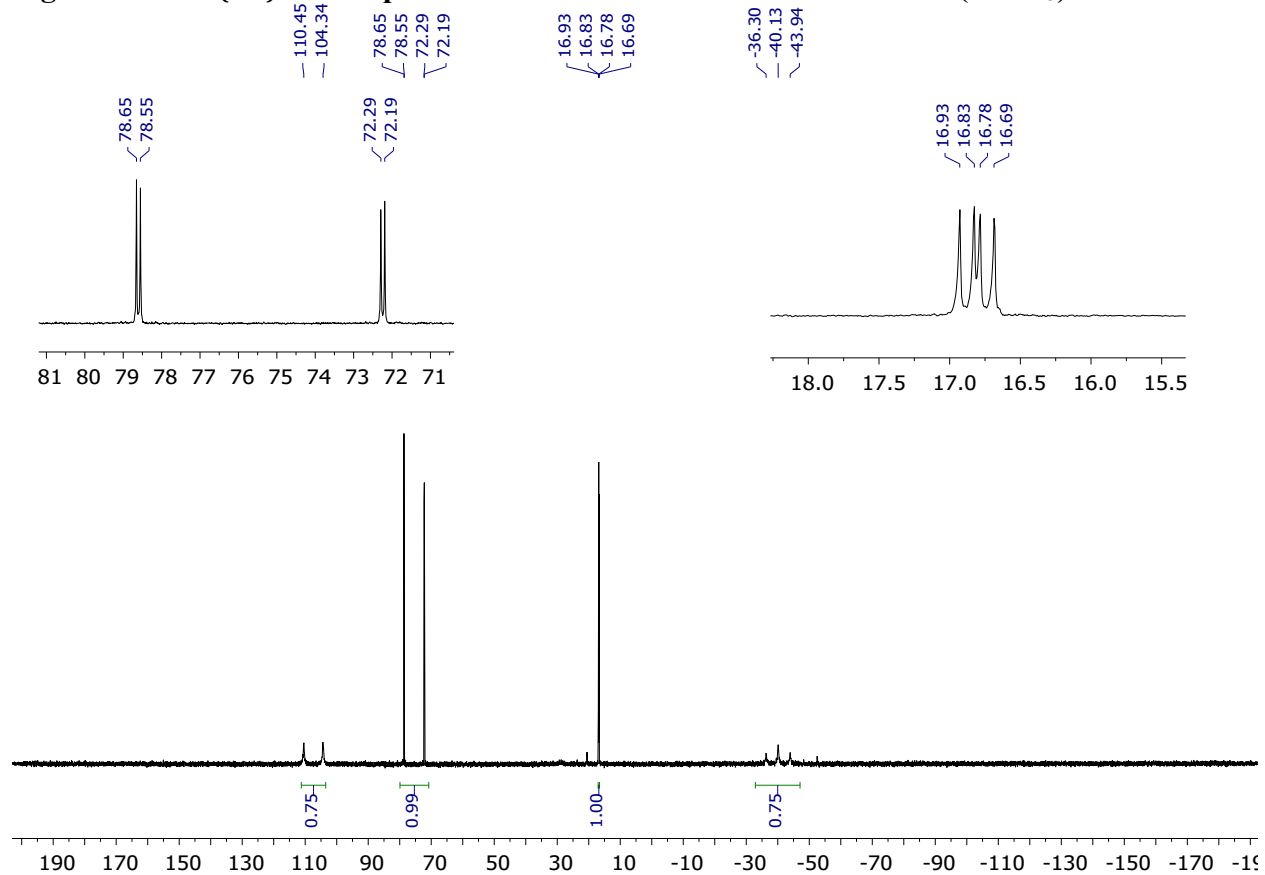

Figure S19.  $^{19}\text{F}$  NMR spectrum of reaction of  $\text{Ph}_2\text{FPCH}_2$  with **2a** ( $\text{CDCl}_3$ ).

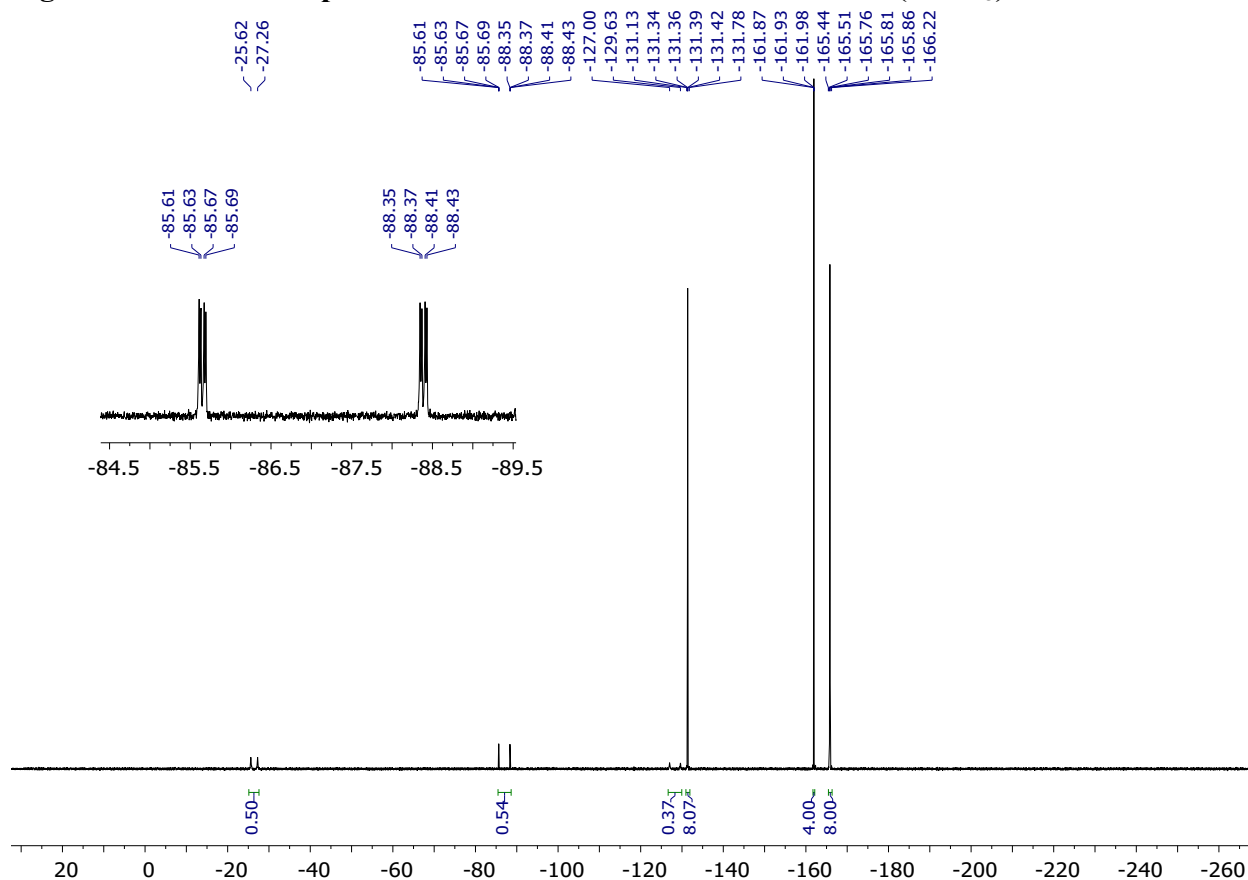

### Preparation of $[\text{Ph}_2\text{PClCH}_3][\text{Cl}]$ (**5**)

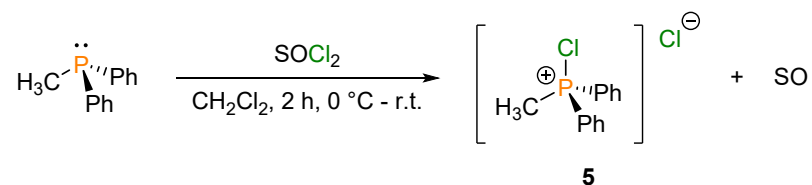

In a 50 mL Schlenk flask,  $\text{Ph}_2\text{PCH}_3$  (1.59 g, 7.93 mmol, 1 equiv) was dissolved with 10 mL of DCM. After sealing the flask with a threaded Teflon stopper, it was attached to a  $\text{N}_2$ /vacuum manifold and placed under a positive pressure of dry  $\text{N}_2$  gas. The homogeneous solution was cooled to  $0^\circ\text{C}$  in an ice bath before the Teflon stopper was removed and replaced with a rubber septum. Using a gas-tight syringe,  $\text{SOCl}_2$  (0.580 mL, 7.95 mmol, 1 equiv) was added dropwise. Once the rubber septum was replaced with the Teflon stopper, the solution was warmed to room temperature and stirred for 2 hours. The Schlenk tube containing the reaction mixture was brought back into the glovebox, where its contents were transferred to a scintillation vial (washing with 1 mL of DCM), and the volatiles were then removed *in vacuo*. The resulting yellow residue was triturated with 3x3 mL of pentane and dried under high vacuum to yield  $[\text{Ph}_2\text{PClCH}_3][\text{Cl}]$  (**5**) as an off-white powder (1.82 g, 6.70 mmol, 85% yield). NMR spectroscopy data are in line with previously reported values.<sup>5,6</sup>

$^1\text{H}$  NMR (400 MHz,  $\text{CDCl}_3$ , 298 K)  $\delta$  8.29 – 8.09 (m, 4H), 7.83 – 7.72 (m, 2H), 7.73 – 7.62 (m, 4H), 3.80 (d,  $^2J_{\text{HP}} = 12.9$  Hz, 3H).

$^{13}\text{C}\{^1\text{H}\}$  NMR (126 MHz,  $\text{CDCl}_3$ , 298 K)  $\delta$  136.3 (d,  $J = 3.3$  Hz), 132.6 (d,  $J = 13.8$  Hz), 130.4 (d,  $J = 15.0$  Hz), 121.1 (d,  $J = 91.5$  Hz), 17.9 (d,  $J = 52.2$  Hz).

$^{31}\text{P}\{^1\text{H}\}$  NMR (162 MHz,  $\text{CDCl}_3$ , 298K)  $\delta$  70.5 (s, 1P).

Figure S20.  $^1\text{H}$  NMR spectrum of **5** ( $\text{CDCl}_3$ ).

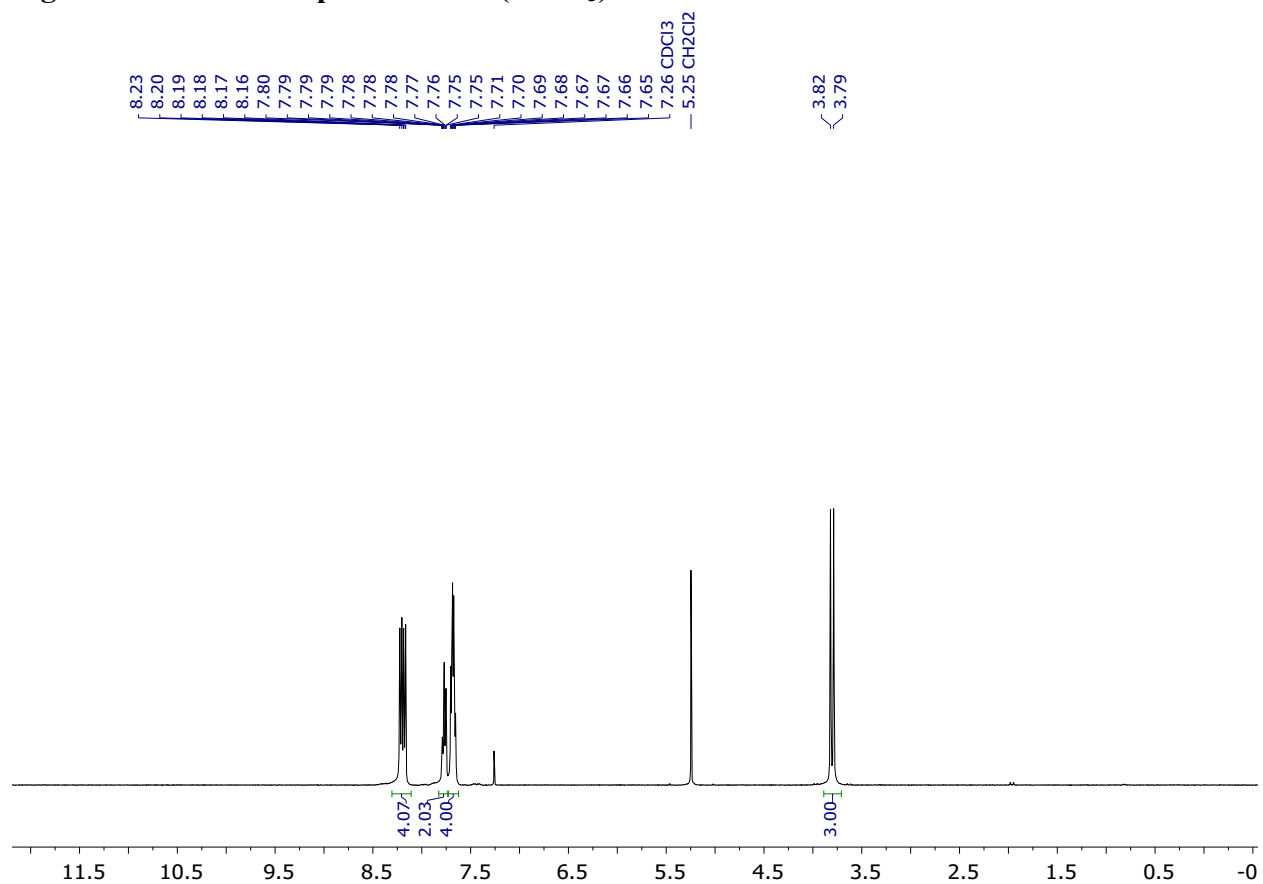

Figure S21.  $^{13}\text{C}\{^1\text{H}\}$  NMR spectrum of **5** ( $\text{CDCl}_3$ ).

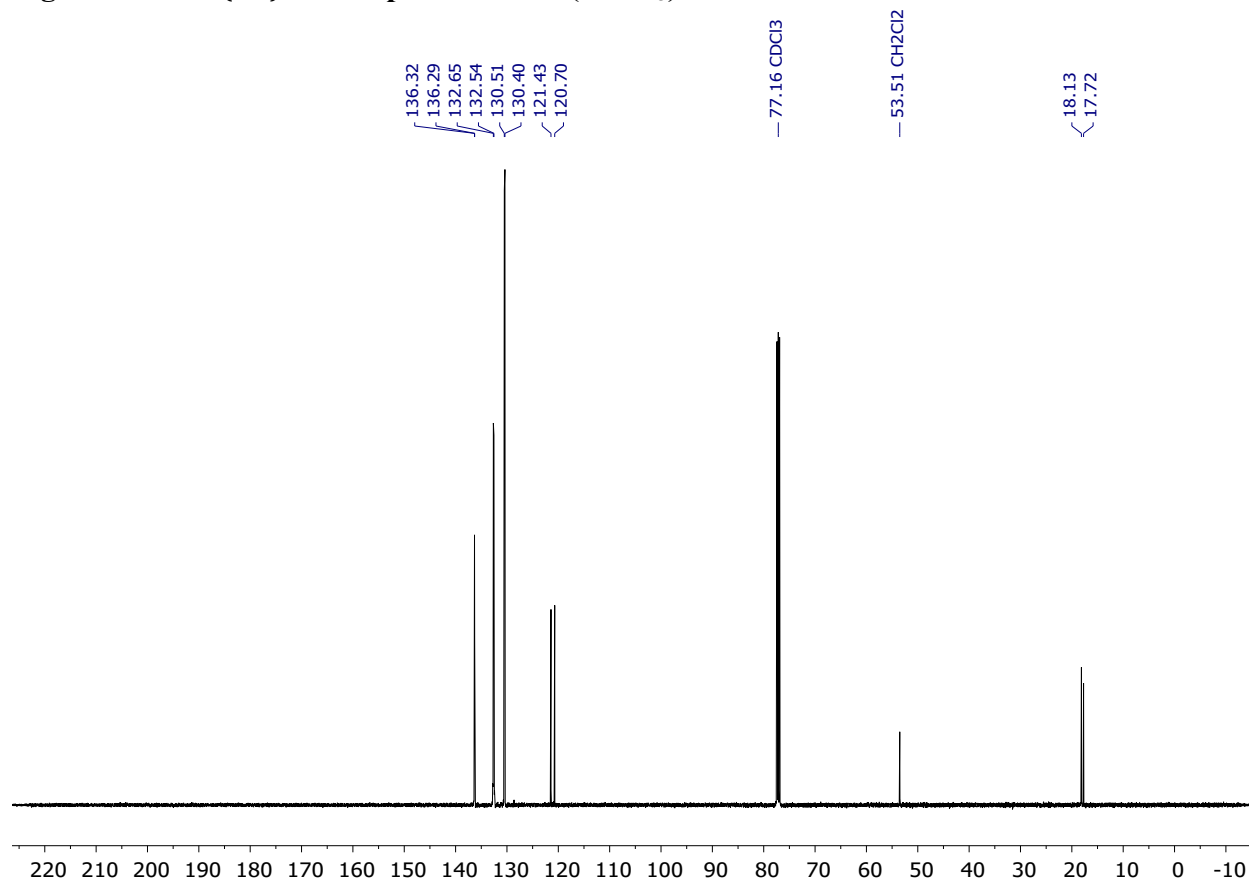



Figure S22.  $^{31}\text{P}\{^1\text{H}\}$  NMR spectrum of **5** ( $\text{CDCl}_3$ ).

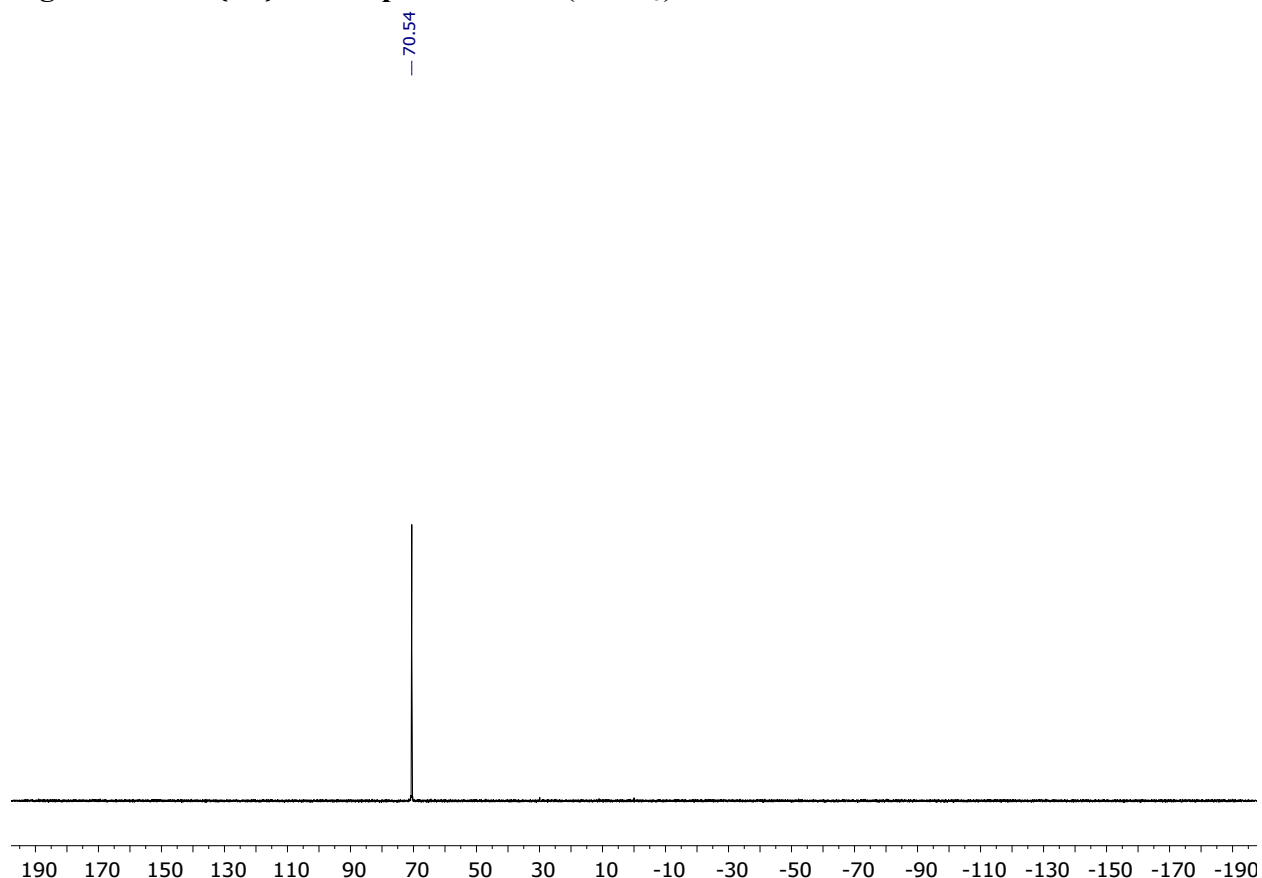

### Preparation of $[\text{Ph}_2\text{ClPC}(\text{H})\text{PPh}_2\text{CH}_3][\text{Cl}]$ (**6**)

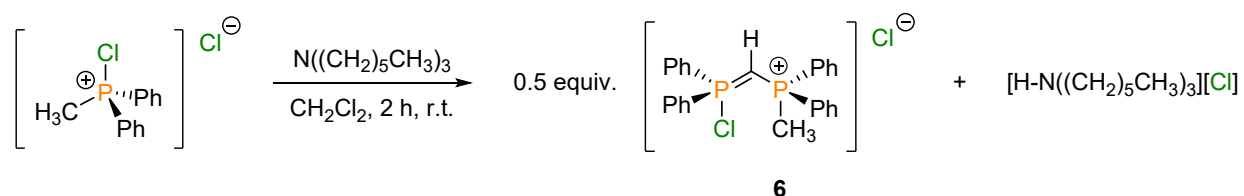

This previously reported compound<sup>7</sup> was prepared in an alternative method as follows:

To a 20 mL scintillation vial containing a 3 mL DCM solution of **5** (0.240 g, 0.885 mmol, 1 equiv) was added a 2 mL DCM solution of  $\text{N}((\text{CH}_2)_5\text{CH}_3)_3$  (0.241 g, 0.894 mmol, 1 equiv), leading to a homogeneous, pale-yellow solution which was stirred for 2 hours. After 2 hours, the solvent was removed *in vacuo* and the residue washed with 3x3 mL toluene and dried under high vacuum to afford **6** as a white powder (0.163 g, 0.347 mmol, 77% yield).

X-ray quality crystal was obtained by layering a DCM solution of **6** with pentane and storing at  $-35\text{ }^\circ\text{C}$ .

$^1\text{H}$  NMR (400 MHz,  $\text{CDCl}_3$ , 298 K)  $\delta$  7.90 – 7.80 (m, 4H), 7.77 – 7.69 (m, 4H), 7.62 – 7.52 (m, 4H), 7.52 – 7.41 (m, 8H), 2.87 – 2.80 (m, 1H), 2.55 (d,  $^2J_{\text{HP}} = 13.3$  Hz, 3H).

$^{13}\text{C}\{^1\text{H}\}$  NMR (126 MHz,  $\text{CDCl}_3$ , 298 K)  $\delta$  134.1 (d,  $J = 3.4$  Hz), 133.6 (d,  $J = 3.0$  Hz), 132.3 (d,  $J = 11.0$  Hz), 132.2 (d,  $J = 11.8$  Hz), 129.7 (d,  $J = 14.8$  Hz), 129.6 (d,  $J = 12.8$  Hz), 127.6 (br d,  $J = 113.3$  Hz), 124.8 (br d,  $J = 90.6$  Hz), 18.7 – 16.1 (m), 14.9 (dd,  $J = 63.7, 4.9$  Hz).

$^{31}\text{P}\{^1\text{H}\}$  NMR (162 MHz,  $\text{CDCl}_3$ , 298K)  $\delta$  59.9 (d,  $^2J_{\text{PP}} = 8$  Hz, 1P), 17.4 (d,  $^2J_{\text{PP}} = 8$  Hz, 1P).

**Figure S23.**  $^1\text{H}$  NMR spectrum of **6** ( $\text{CDCl}_3$ ).

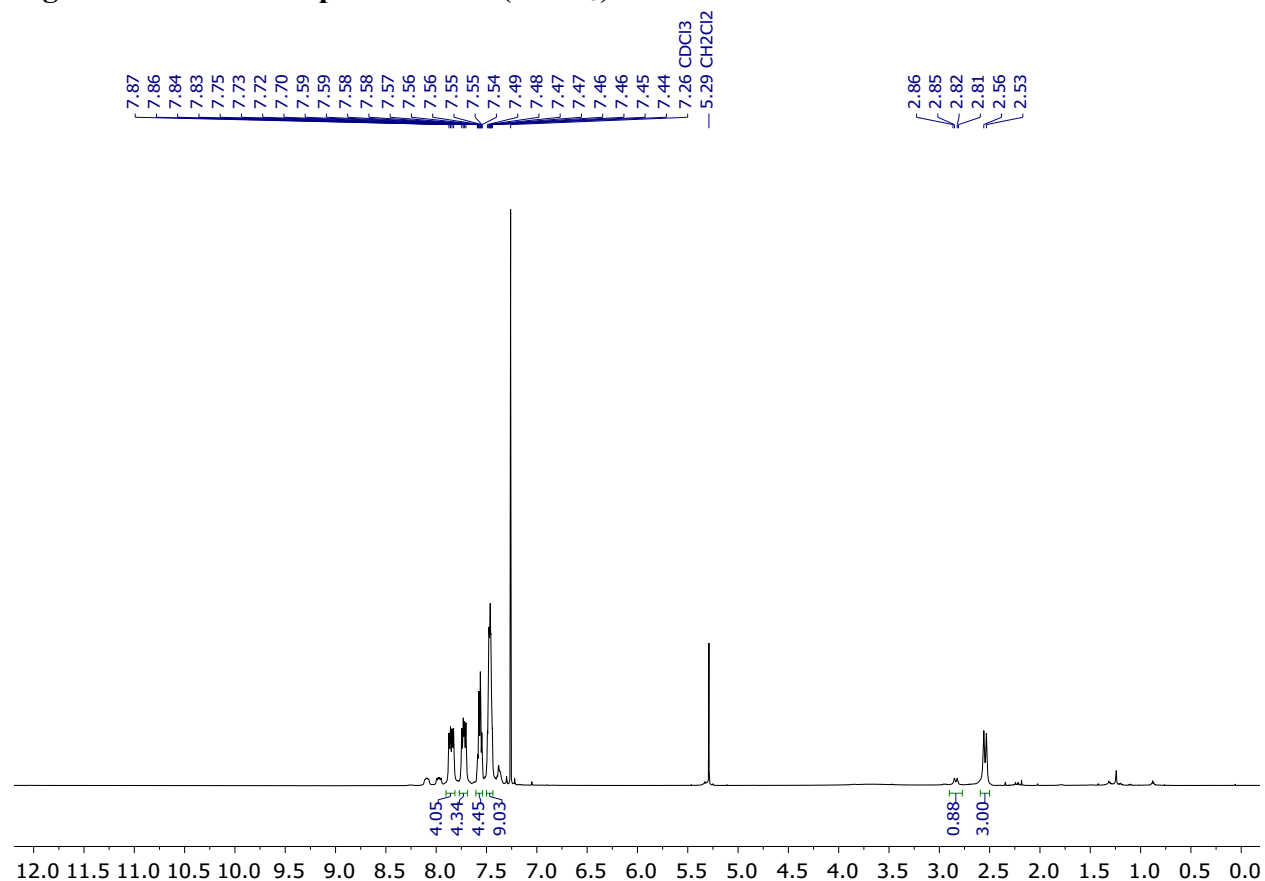

Figure S24.  $^{13}\text{C}\{^1\text{H}\}$  NMR spectrum of 6 ( $\text{CDCl}_3$ ).

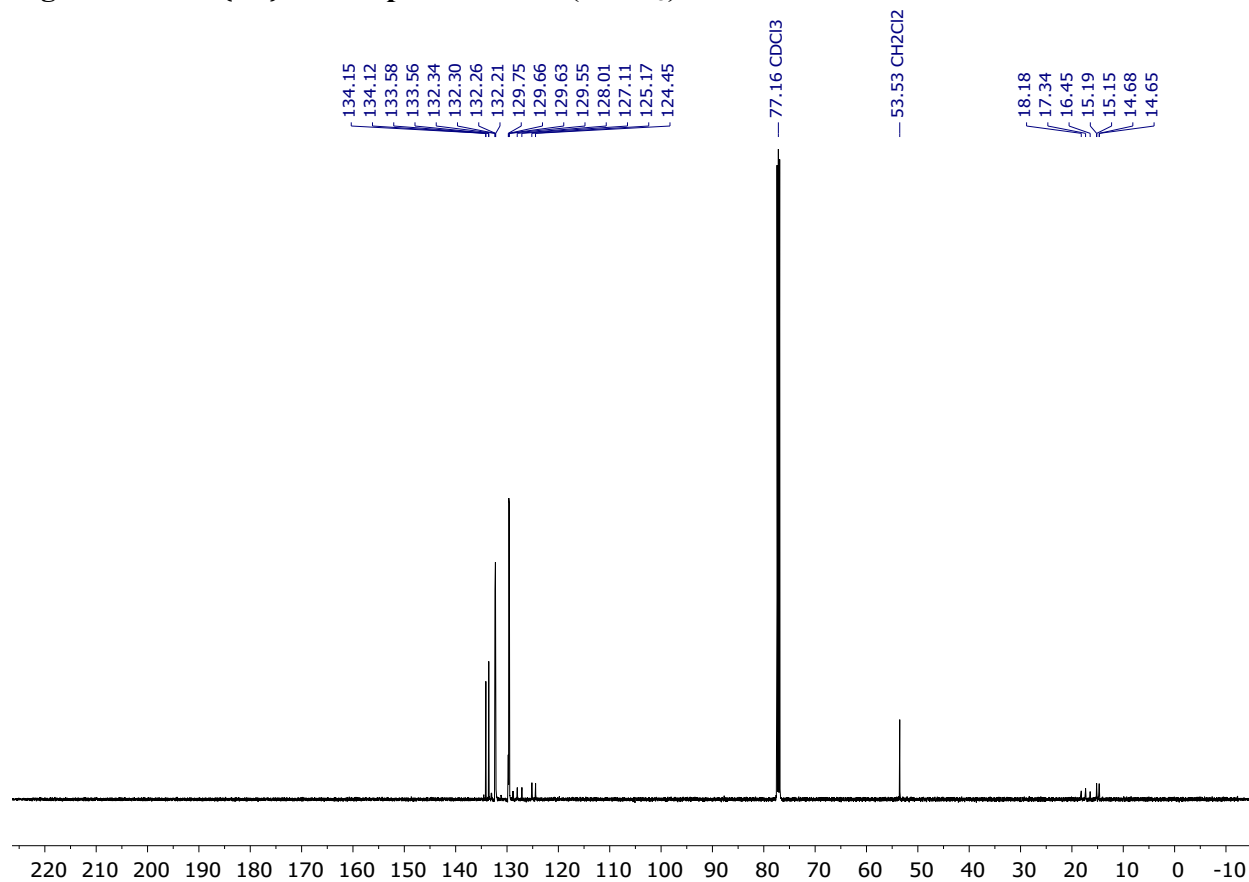

Figure S25.  $^{31}\text{P}\{^1\text{H}\}$  NMR spectrum of **6** ( $\text{CDCl}_3$ ).

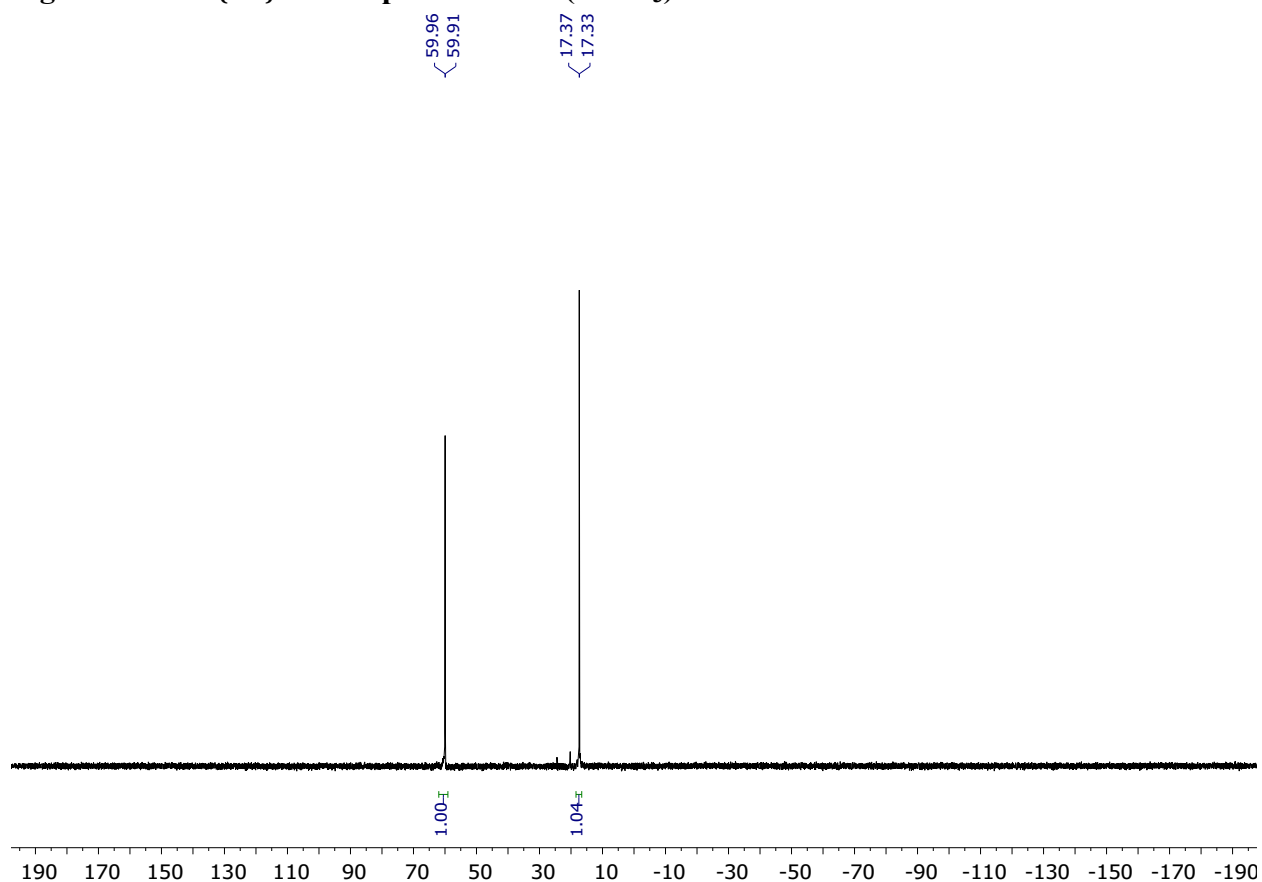

### Preparation of $[\text{Ph}_2(\text{OTf})\text{PC}(\text{H})\text{PPh}_2\text{CH}_3][\text{OTf}]$ (**7**)

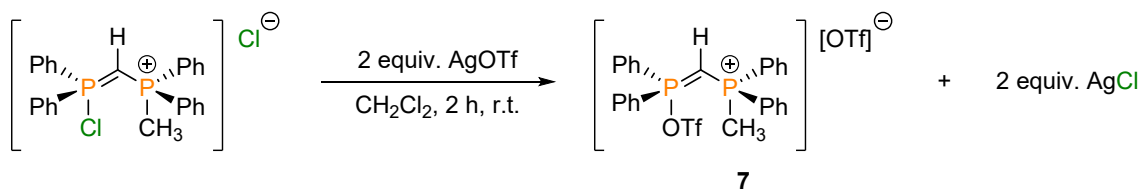

To a 20 mL scintillation vial containing a 2 mL DCM slurry of AgOTf (57.6 mg, 0.220 mmol, 2 equiv) was added a 2 mL DCM solution of **6** (56.5 mg, 0.110 mmol, 1 equiv). The white cloudy mixture was stirred in the dark for 2 hours, then filtered through Celite and the solvent removed *in vacuo* to yield **7** as a colorless residue (40.1 mg, 0.0580 mmol, 52% yield).

$^1\text{H}$  NMR (500 MHz,  $\text{C}_6\text{D}_5\text{Br}$ , 298 K)  $\delta$  7.66 – 7.56 (m, 4H), 7.55 – 7.45 (m, 4H), 7.32 – 7.24 (m, 4H), 7.24 – 7.13 (m, 8H), 3.82 (dd,  $^2J_{\text{HP}} = 9.0$  Hz,  $^2J_{\text{HP}} = 7.1$  Hz, 1H), 2.19 (d,  $^2J_{\text{HP}} = 13.5$  Hz, 3H).

$^{13}\text{C}\{^1\text{H}\}$  NMR (126 MHz,  $\text{C}_6\text{D}_5\text{Br}$ , 298 K)  $\delta$  134.7 (d,  $J = 3.3$  Hz), 133.4 (d,  $J = 3.1$  Hz), 132.1 (d,  $J = 11.8$  Hz), 131.9 (d,  $J = 11.2$  Hz), 129.8 (d,  $J = 15.0$  Hz), 129.4 (d,  $J = 12.8$  Hz), 123.7 (dd,  $J = 91.9, 4.3$  Hz), 123.6 (dd,  $J = 100.8, 4.3$  Hz), 19.6 (dd,  $J = 133.4, 108.2$  Hz), 13.7 (dd,  $J = 63.2, 4.2$  Hz).

$^{31}\text{P}\{^1\text{H}\}$  NMR (162 MHz,  $\text{C}_6\text{D}_5\text{Br}$ , 298K)  $\delta$  70.2 (d,  $^2J_{\text{PP}} = 14$  Hz, 1P), 17.6 (d,  $^2J_{\text{PP}} = 14$  Hz, 1P).

$^{19}\text{F}$  NMR (376 MHz,  $\text{C}_6\text{D}_5\text{Br}$ , 298 K)  $\delta$  -75.4 (s), -77.0 (s).

Figure S26.  $^1\text{H}$  NMR spectrum of 7 ( $\text{C}_6\text{D}_5\text{Br}$ ).

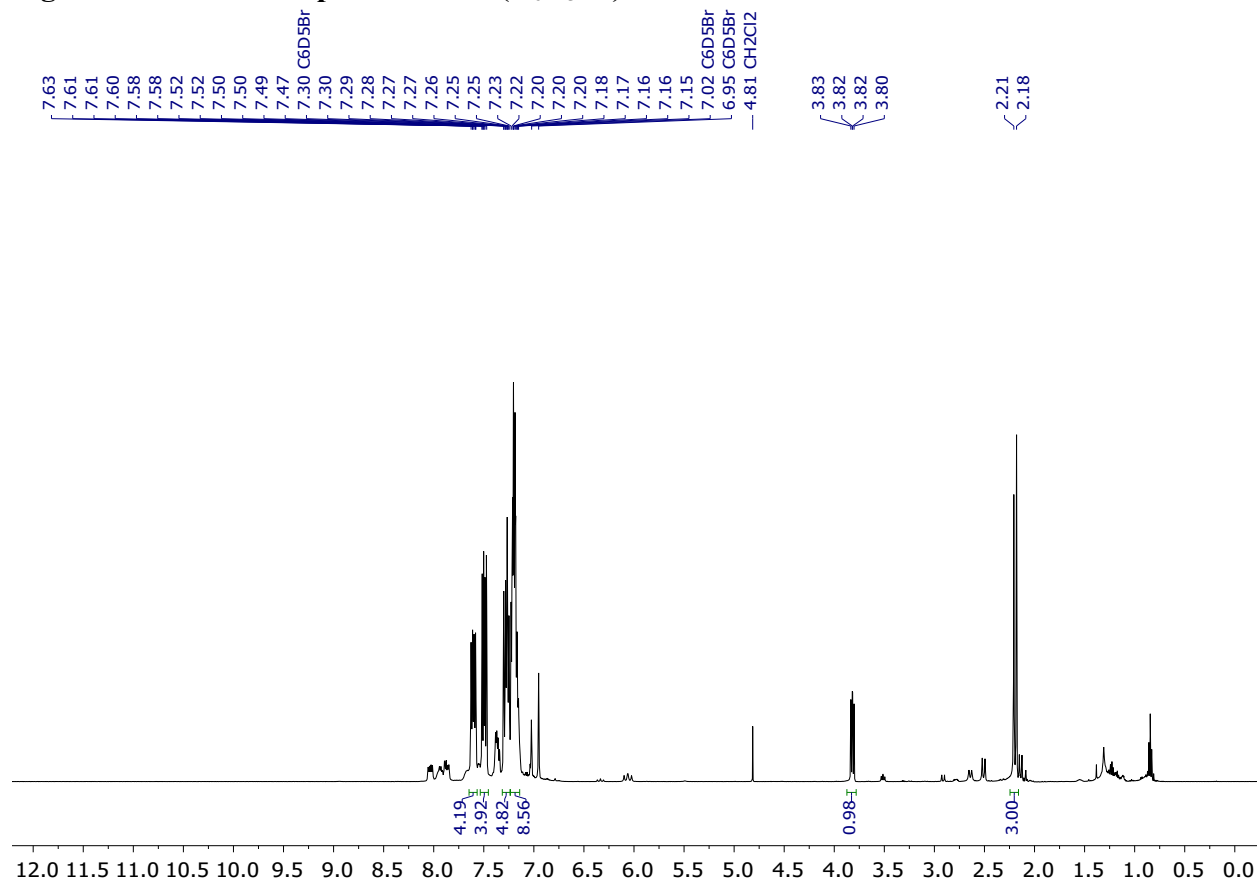

Figure S27.  $^{13}\text{C}\{^1\text{H}\}$  NMR spectrum of 7 ( $\text{C}_6\text{D}_5\text{Br}$ ).

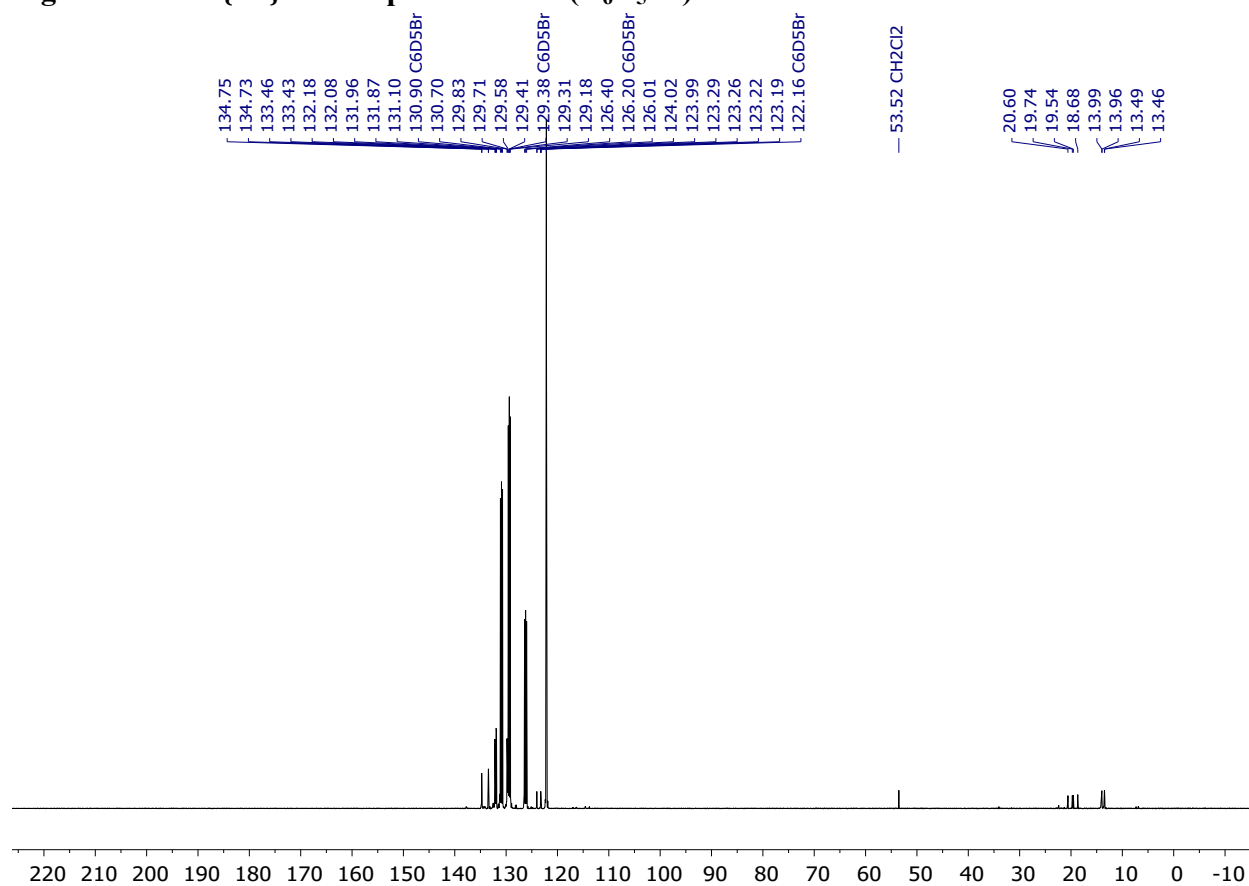

Figure S28.  $^{31}\text{P}\{^1\text{H}\}$  NMR spectrum of **7** ( $\text{C}_6\text{D}_5\text{Br}$ ).

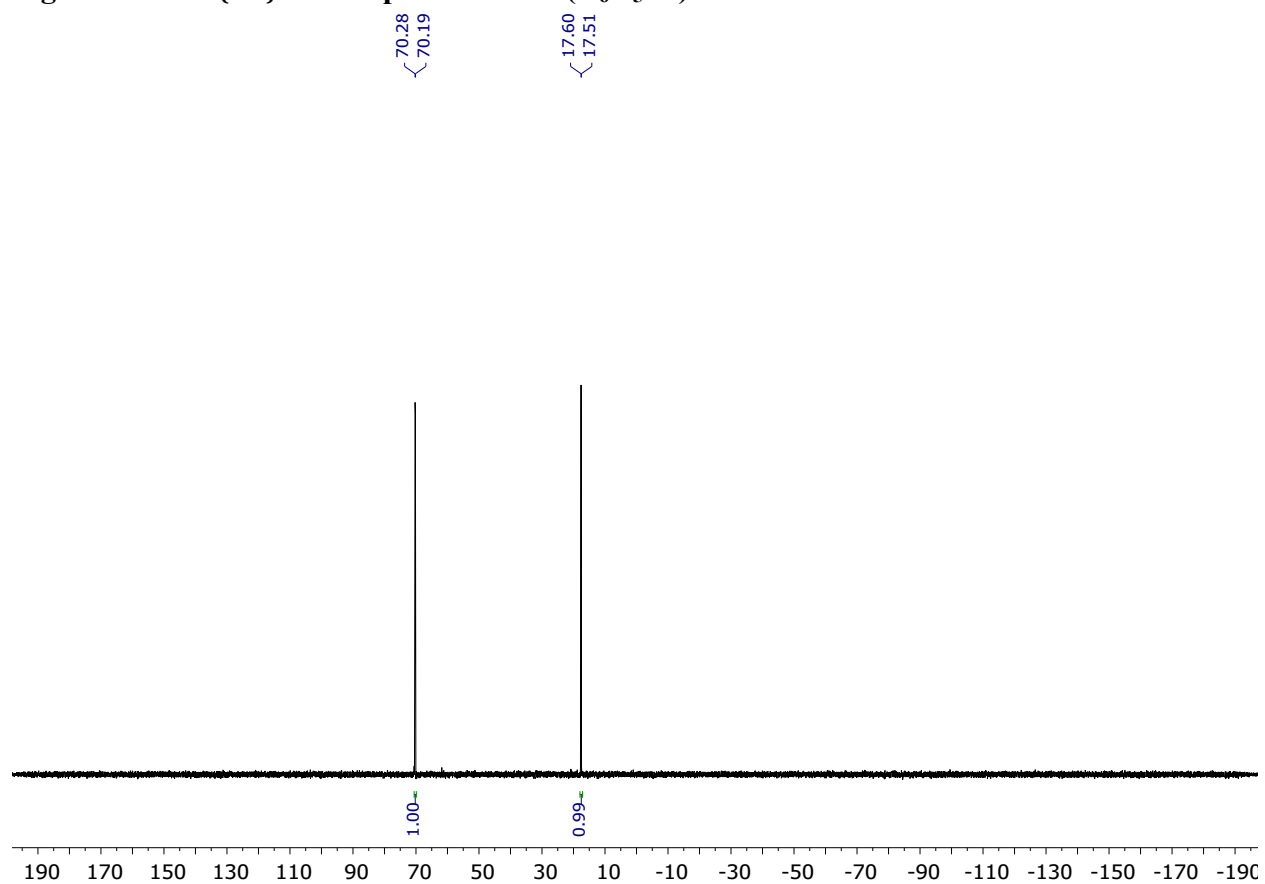

Figure S29.  $^{19}\text{F}$  NMR spectrum of **7** ( $\text{C}_6\text{D}_5\text{Br}$ ).

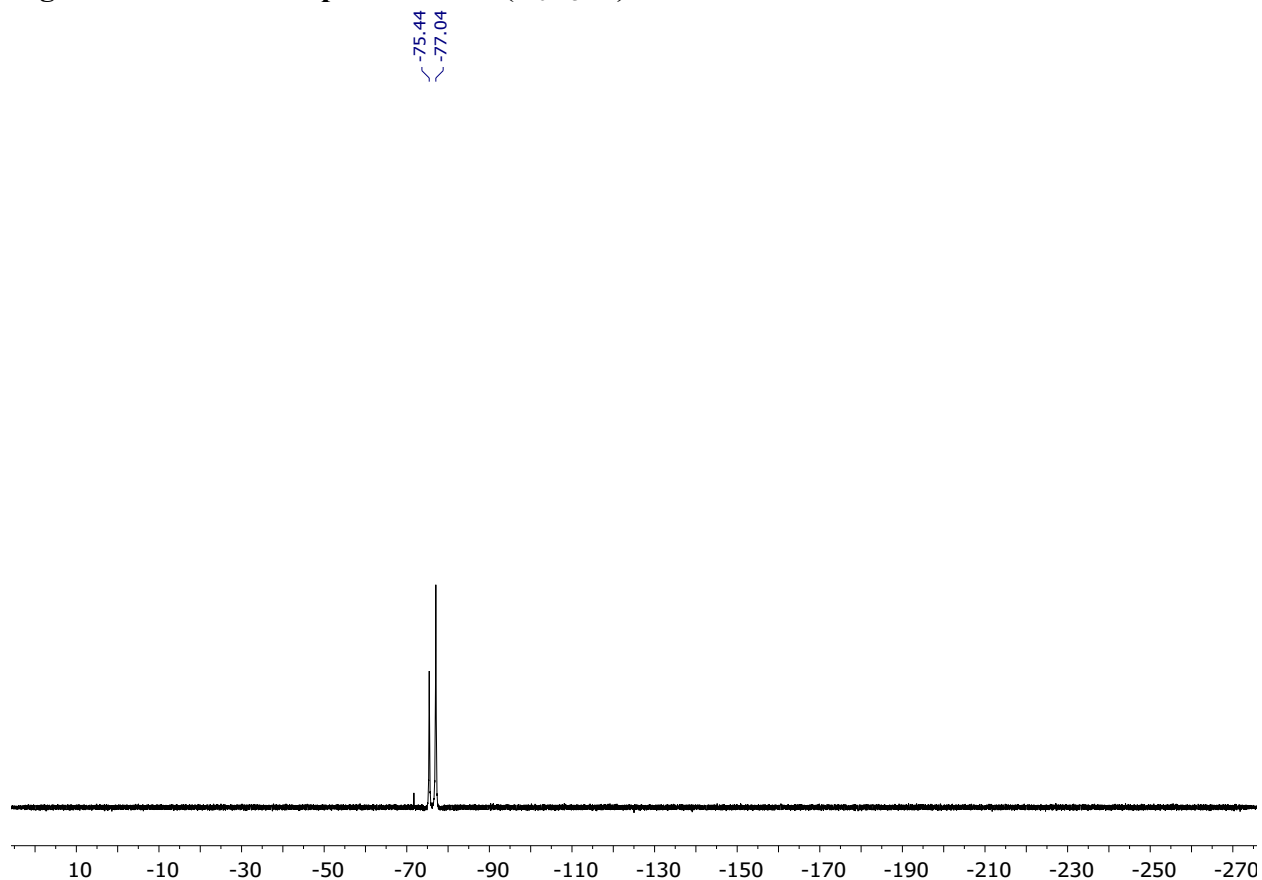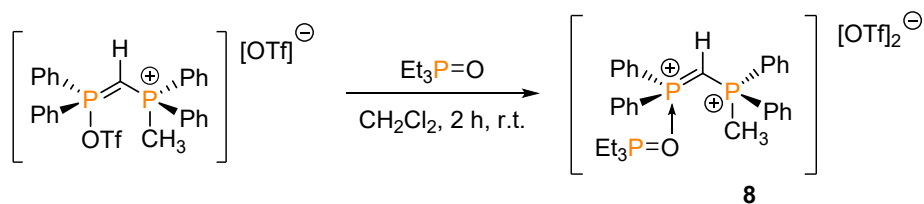

### Reaction of $\text{Et}_3\text{PO}$ with **7** (Gutmann-Beckett Lewis Acidity Test)

Compound **7** (33.0 mg, 0.0474 mmol, 1 equiv) was weighed into a 5 mL vial. In a separate 5 mL vial,  $\text{Et}_3\text{PO}$  (6.4 mg, 0.048 mmol, 1 equiv) was dissolved in 1 mL of DCM and added to **7**. The solution was stirred for 1 h and transferred to an NMR tube via pipette.  $^{31}\text{P}\{^1\text{H}\}$  NMR analysis indicated the adduct formation of  $\text{Et}_3\text{PO}$  with **7** to form **8**.

$^{31}\text{P}\{^1\text{H}\}$  NMR (162 MHz,  $\text{CH}_2\text{Cl}_2$ , 298K)  $\delta$  109.9 (d,  $^2J_{\text{PP}} = 46$  Hz, 1P,  $\text{Et}_3\text{P-O-P}$ ), 57.3 (dd,  $^2J_{\text{PP}} = 46$  Hz,  $^2J_{\text{PP}} = 22$  Hz, 1P,  $\text{Et}_3\text{P-O-P}$ ), 15.4 (d,  $^2J_{\text{PP}} = 22$  Hz, 1P,  $\text{PPh}_2\text{CH}_3$ ).



Figure S30.  $^{31}\text{P}\{^1\text{H}\}$  NMR spectrum of reaction of  $\text{Et}_3\text{PO}$  with **7** ( $\text{CH}_2\text{Cl}_2$ ).

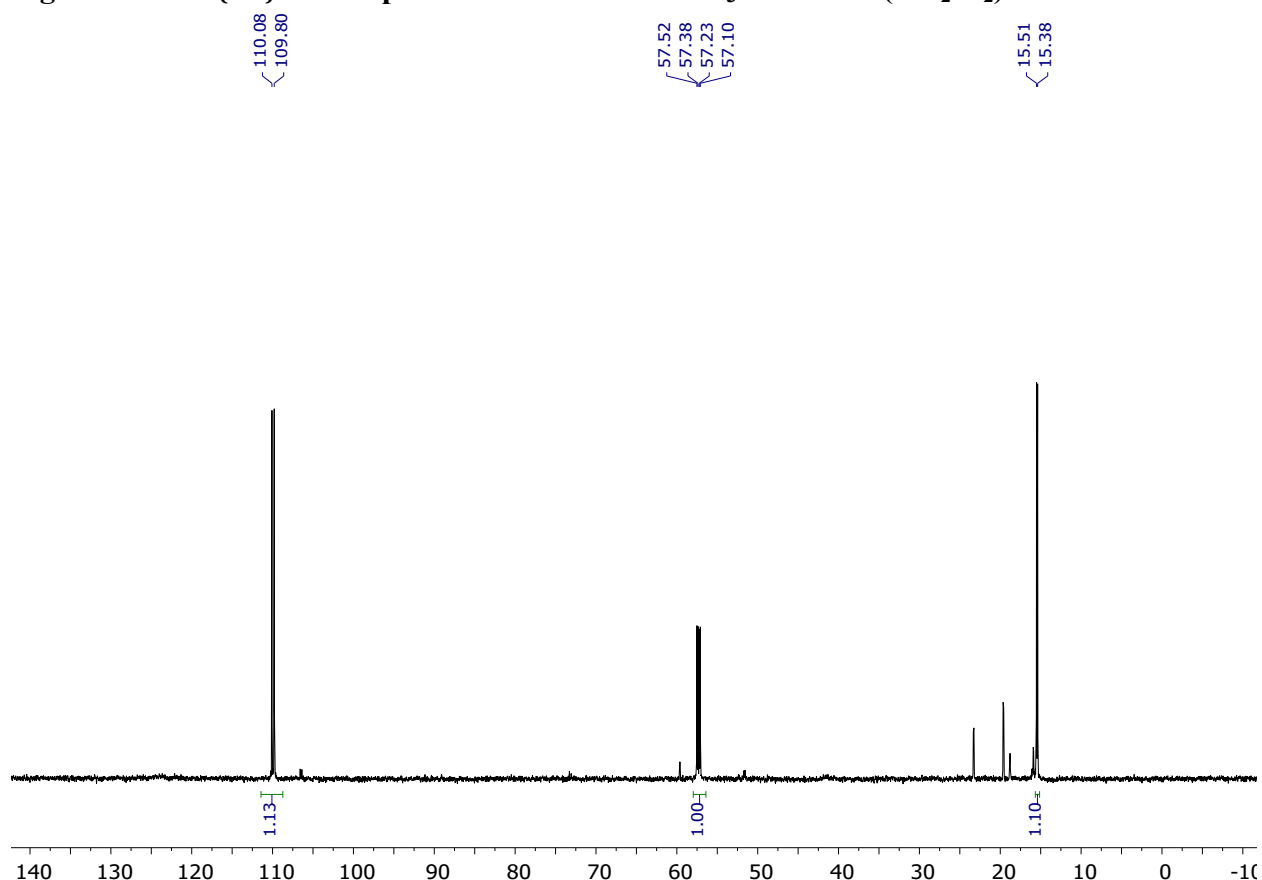

### Preparation of $[\text{Ph}_2(\text{DMAP})\text{PC}(\text{H})\text{PPh}_2\text{CH}_3][\text{OTf}]_2$ (**9**)

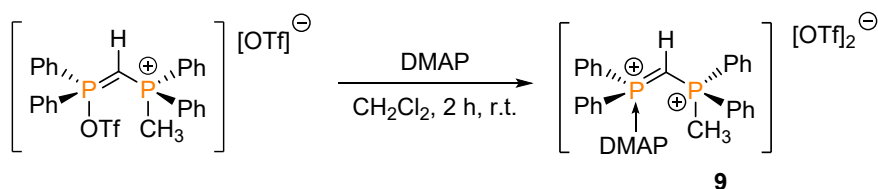

To a 20 mL scintillation vial containing a 3 mL DCM solution of **7** (49.3 mg, 0.0708 mmol, 1 equiv) was added a 2 mL DCM solution of DMAP (8.7 mg, 0.071 mmol, 1 equiv). The resultant mixture was stirred for 2 hours before the solvent was removed *in vacuo*. The product residue was triturated with 3x3 mL of pentane and dried under high vacuum to yield **9** as a white powder (41.7 mg, 0.0509 mmol, 72% yield).

$^1\text{H}$  NMR (400 MHz,  $\text{CDCl}_3$ , 298 K)  $\delta$  8.49 (dd,  $^3J_{\text{HH}} = 8.0$  Hz,  $^3J_{\text{HP}} = 8.0$  Hz, 2H), 7.69 – 7.40 (m, 20H), 7.25 (d,  $^3J_{\text{HH}} = 8.0$  Hz, 2H), 3.34 (s, 6H), 2.97 (dd,  $^2J_{\text{HP}} = 9.5$  Hz,  $^2J_{\text{HP}} = 6.4$  Hz, 1H), 2.35 (d,  $^2J_{\text{HP}} = 13.1$  Hz, 3H).

$^{13}\text{C}\{^1\text{H}\}$  NMR (126 MHz,  $\text{CDCl}_3$ , 298 K)  $\delta$  157.9 (d,  $J = 1.2$  Hz), 140.2 (d,  $J = 6.5$  Hz), 135.5 (d,  $J = 3.2$  Hz), 133.8 (d,  $J = 3.0$  Hz), 132.7 (d,  $J = 11.4$  Hz), 131.9 (d,  $J = 11.0$  Hz), 130.6 (d,  $J = 14.2$  Hz).

Hz), 130.0 (d,  $J = 12.8$  Hz), 124.7 (dd,  $J = 92.2, 3.9$  Hz), 120.9 (q,  $J = 321.6$  Hz), 120.5 (dd,  $J = 112.4, 3.6$  Hz), 109.8 (d,  $J = 5.7$  Hz), 41.0, 15.5 (d,  $J = 63.7, 2.8$  Hz), 8.43 (dd,  $J = 138.4, 114.0$  Hz).

$^{31}\text{P}\{^1\text{H}\}$  NMR (162 MHz,  $\text{CDCl}_3$ , 298K)  $\delta$  51.5 (d,  $^2J_{\text{PP}} = 23$  Hz, 1P), 18.0 (d,  $^2J_{\text{PP}} = 23$  Hz, 1P).

$^{19}\text{F}$  NMR (376 MHz,  $\text{CDCl}_3$ , 298 K)  $\delta$  -78.3 (s).

Figure S31.  $^1\text{H}$  NMR spectrum of **9** ( $\text{CDCl}_3$ ).

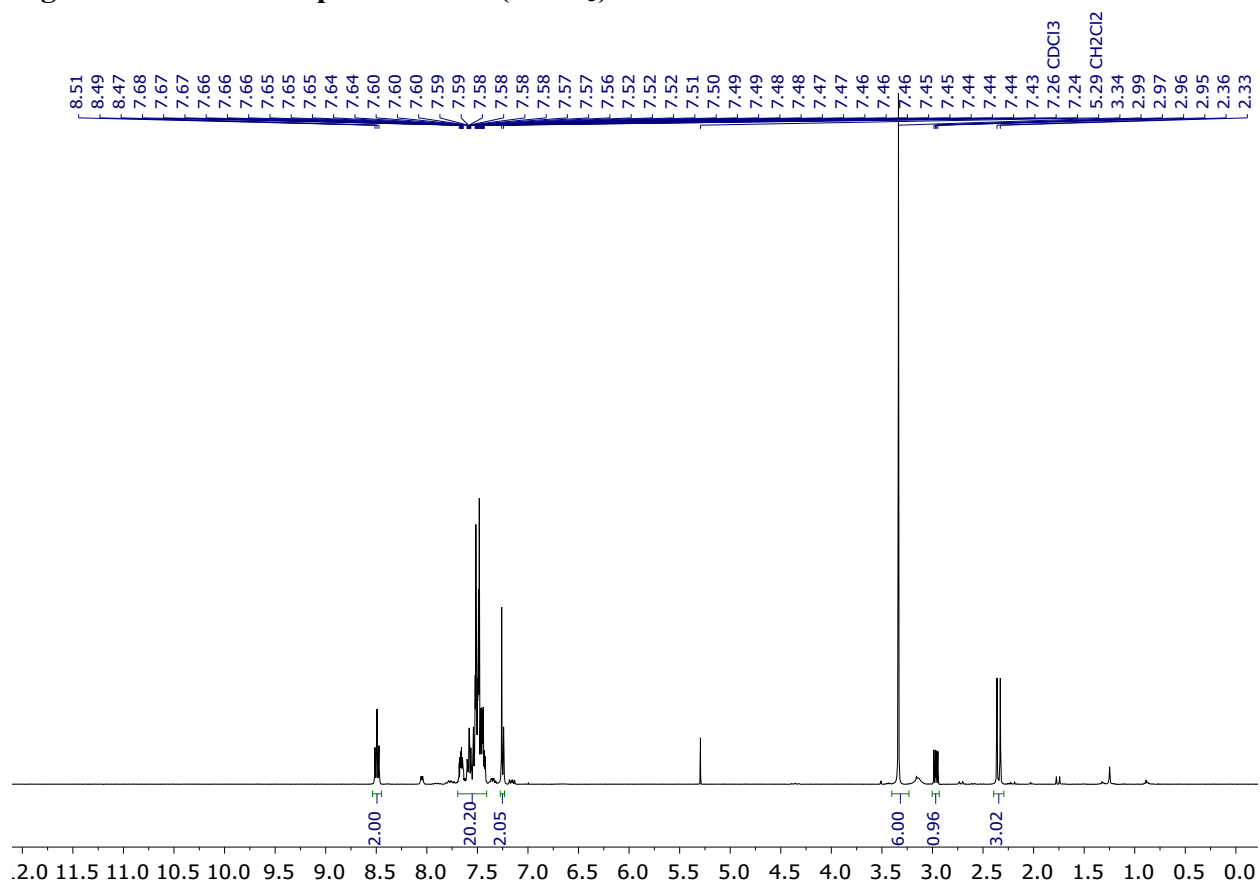

Figure S32.  $^{13}\text{C}\{^1\text{H}\}$  NMR spectrum of 9 ( $\text{CDCl}_3$ ).

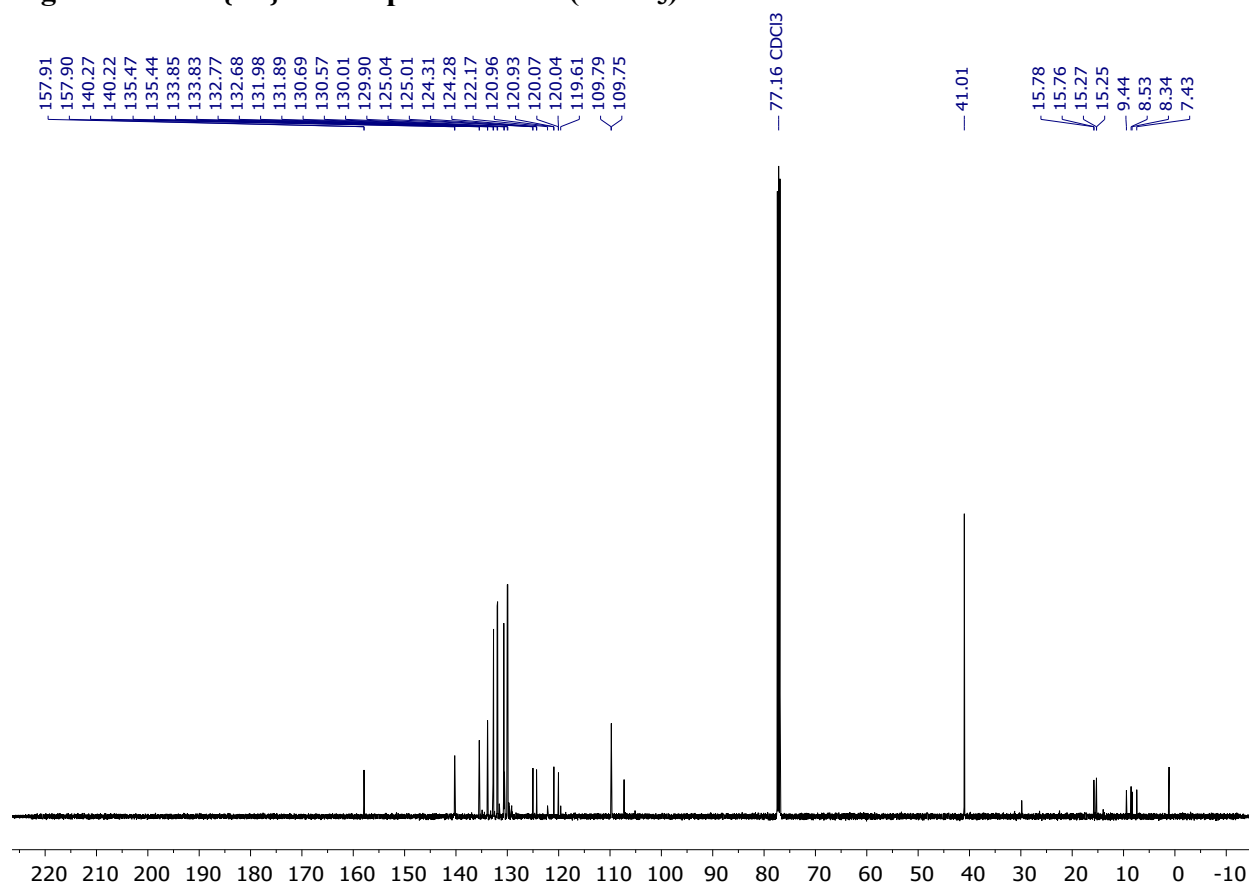

Figure S33.  $^{31}\text{P}\{^1\text{H}\}$  NMR spectrum of **9** ( $\text{CDCl}_3$ ).

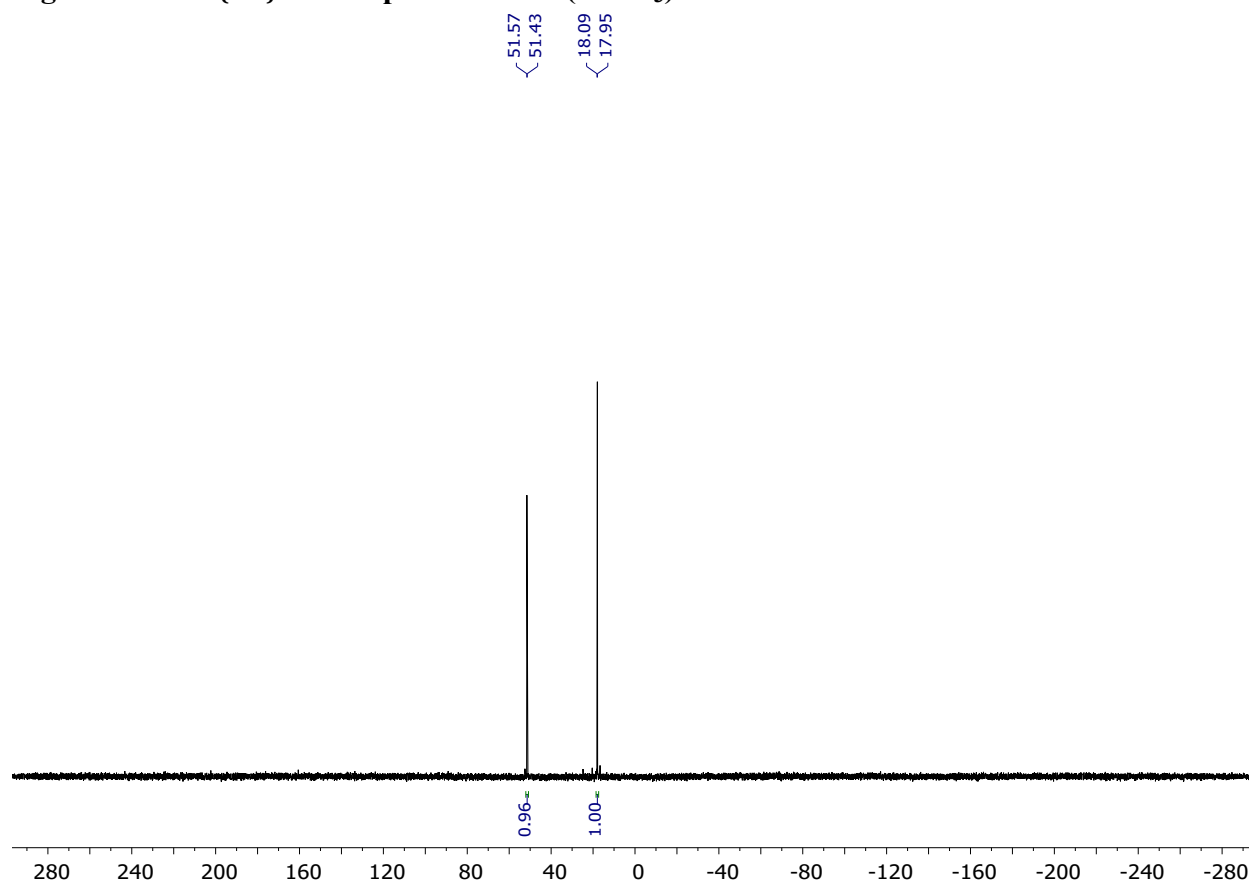

Figure S34.  $^{19}\text{F}$  NMR spectrum of **9** ( $\text{CDCl}_3$ ).

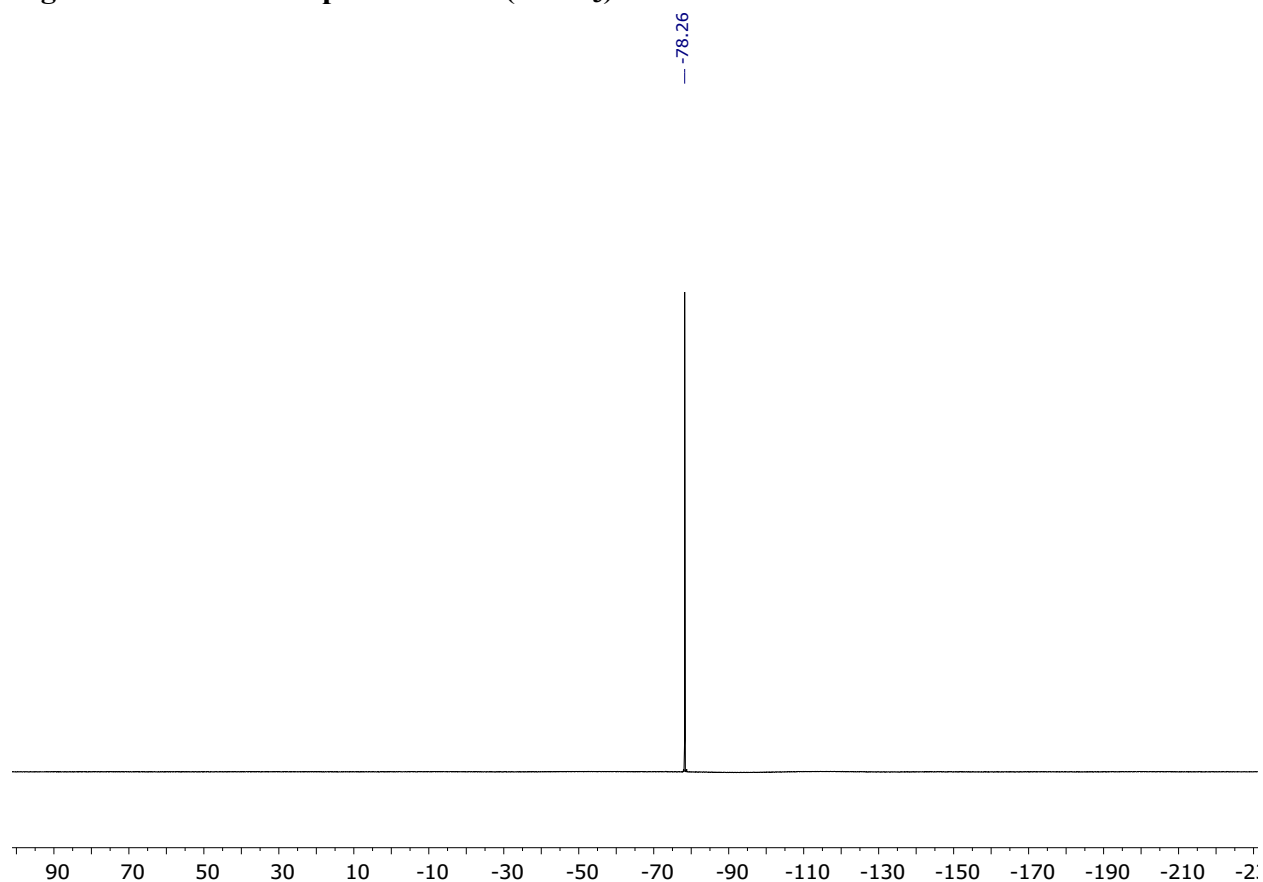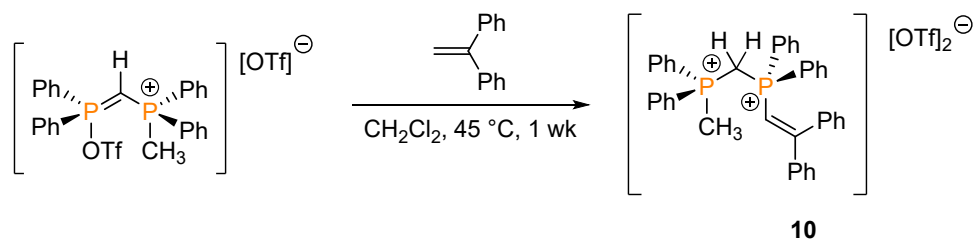

### Reaction of **7** with 1,1-Diphenylethylene (**10**)

To a 3 mL DCM solution of **7** (40.0 mg, 0.0574 mmol, 1 equiv.) was added 10.1  $\mu$ L of 1,1-diphenylethylene via syringe and the resultant mixture was transferred to a Schlenk tube. The reaction was heated at 45 °C for 1 week, then brought into the glovebox and filtered over Celite to yield a colorless residue. The product was triturated with 3x3ml pentane and dried under high vacuum to yield **10** as a white powder (38.2 mg, 0.0436 mmol, 76% yield).

X-ray quality crystal was obtained by layering a DCM solution of **10** with pentane and storing at -35 °C.

**<sup>1</sup>H NMR** (400 MHz, CDCl<sub>3</sub>, 298 K) 7.92 – 7.62 (m, 12H), 7.61 – 7.42 (m, 8H), 7.40 – 7.30 (m, 4H), 7.11 (t, <sup>3</sup>J<sub>HH</sub> = 7.5 Hz, 1H), 6.88 (t, <sup>3</sup>J<sub>HH</sub> = 7.7 Hz, 2H), 6.66 – 6.46 (m, 3H), 5.23 (t, <sup>2</sup>J<sub>HP</sub> = 16.0 Hz, 2H), 2.65 (d, <sup>2</sup>J<sub>HP</sub> = 13.8 Hz, 1H), 2.15 (d, <sup>2</sup>J<sub>HP</sub> = 13.5 Hz, 3H).

**<sup>13</sup>C{<sup>1</sup>H} NMR** (126 MHz, CDCl<sub>3</sub>, 298 K) 172.0 (d, *J* = 3.8 Hz), 138.8 (d, *J* = 17.8 Hz), 136.2 (d, *J* = 7.6 Hz), 135.7 (d, *J* = 3.3 Hz), 135.5 (d, *J* = 3.1 Hz), 133.8 (d, *J* = 11.4 Hz), 132.9 (d, *J* = 11.2 Hz), 132.7 (d, *J* = 11.0 Hz), 132.3, 130.7 (d, *J* = 15.3 Hz), 130.6 (d, *J* = 15.5 Hz), 130.3 (d, *J* = 13.3 Hz), 129.9, 129.6 (d, *J* = 13.6 Hz), 129.4, 128.8 (d, *J* = 34.9 Hz), 128.7, 128.4 (d, *J* = 13.5 Hz), 127.8, 117.6 (dd, *J* = 88.0, 2.8 Hz), 117.1 (dd, *J* = 88.9, 2.3 Hz), 101.9 (d, *J* = 91.9 Hz), 21.6 – 20.2 (m), 8.33 (d, *J* = 55.7 Hz).

**<sup>31</sup>P{<sup>1</sup>H} NMR** (162 MHz, CDCl<sub>3</sub>, 298K)  $\delta$  19.7 (d, <sup>2</sup>J<sub>PP</sub> = 17 Hz, 1P), 11.0 (d, <sup>2</sup>J<sub>PP</sub> = 17 Hz, 1P)

**<sup>19</sup>F NMR** (376 MHz, CDCl<sub>3</sub>, 298 K)  $\delta$  -78.3 (s).

Figure S35. <sup>1</sup>H NMR spectrum of 10 (CDCl<sub>3</sub>).

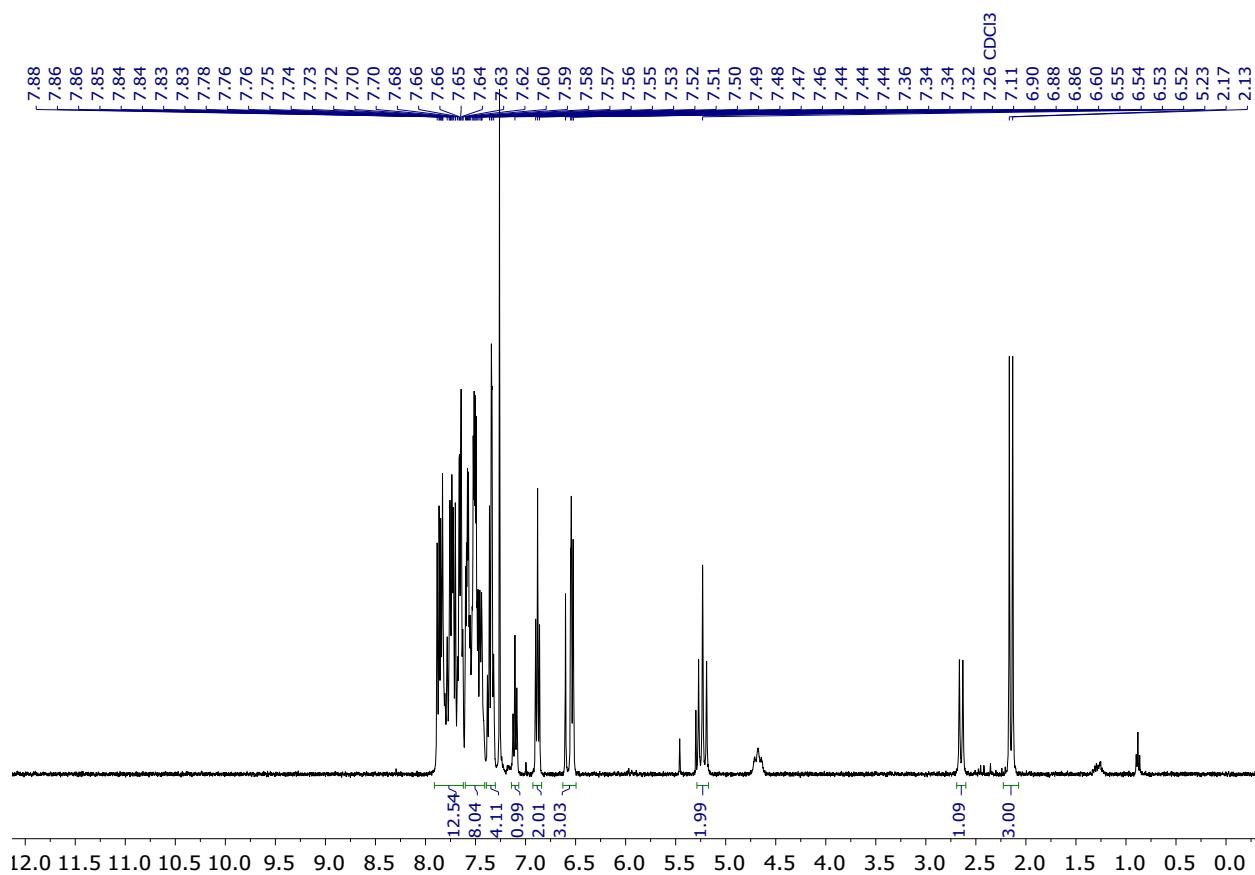

Figure S36.  $^{13}\text{C}\{^1\text{H}\}$  NMR spectrum of 10 ( $\text{CDCl}_3$ ).

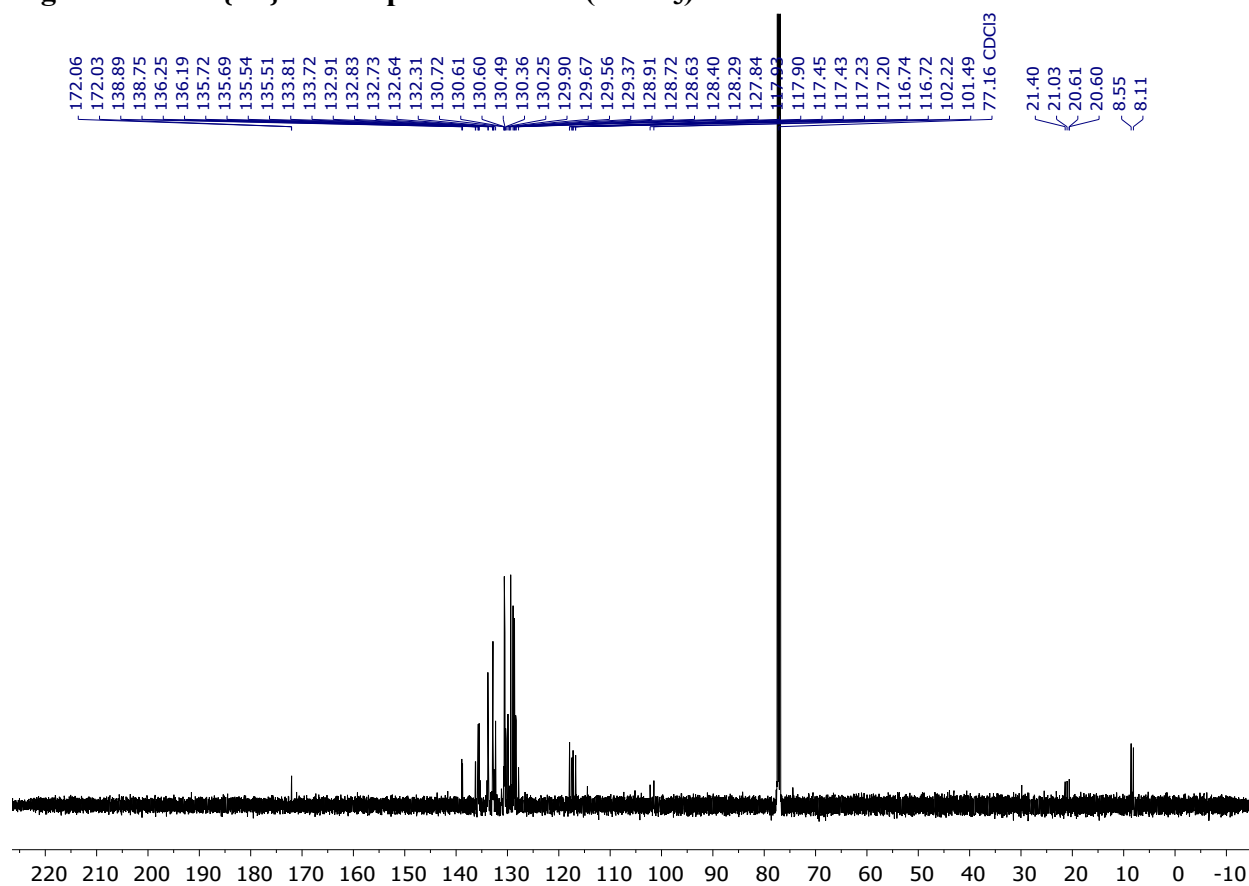



Figure S37.  $^{31}\text{P}\{^1\text{H}\}$  NMR spectrum of **10** ( $\text{CDCl}_3$ ).

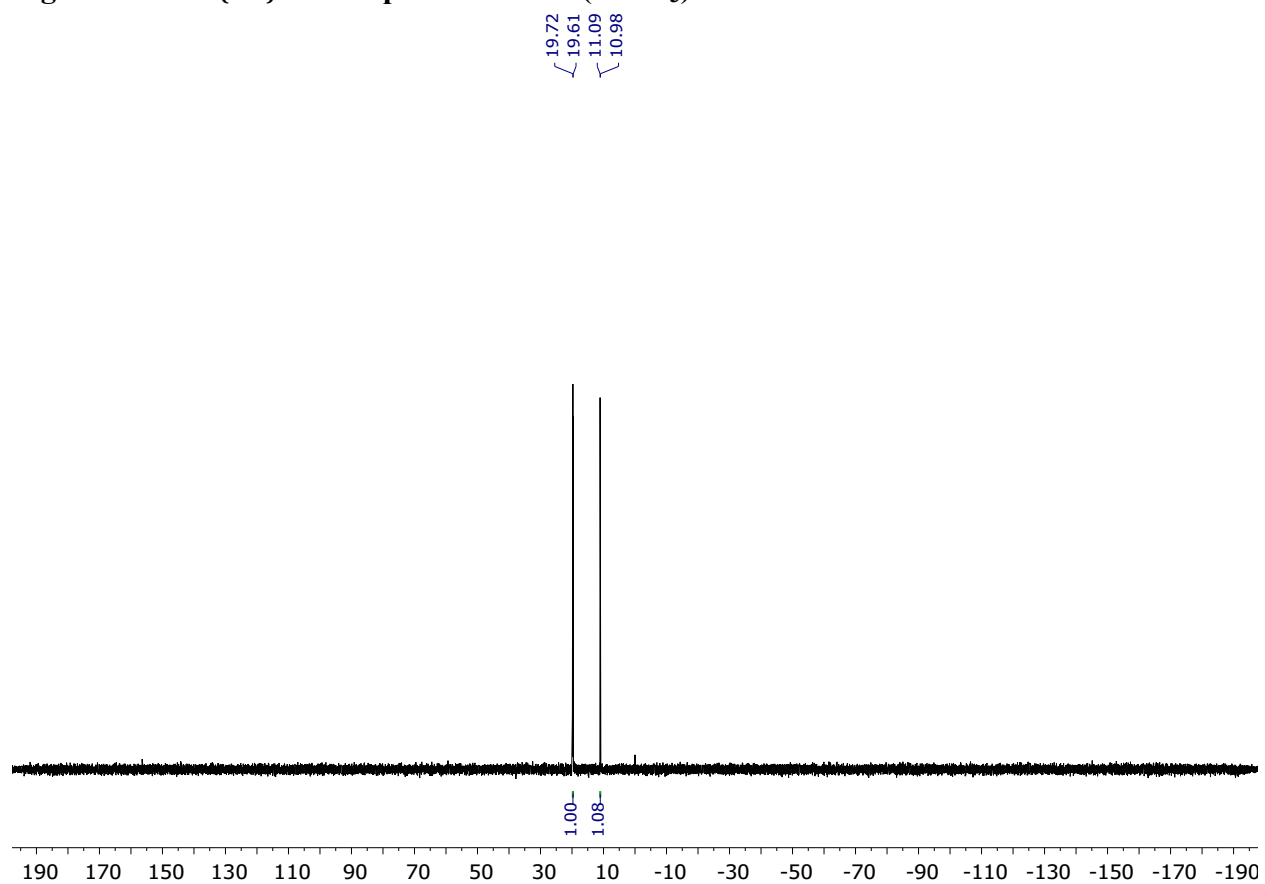

Figure S38.  $^{19}\text{F}$  NMR spectrum of **10** ( $\text{CDCl}_3$ ).

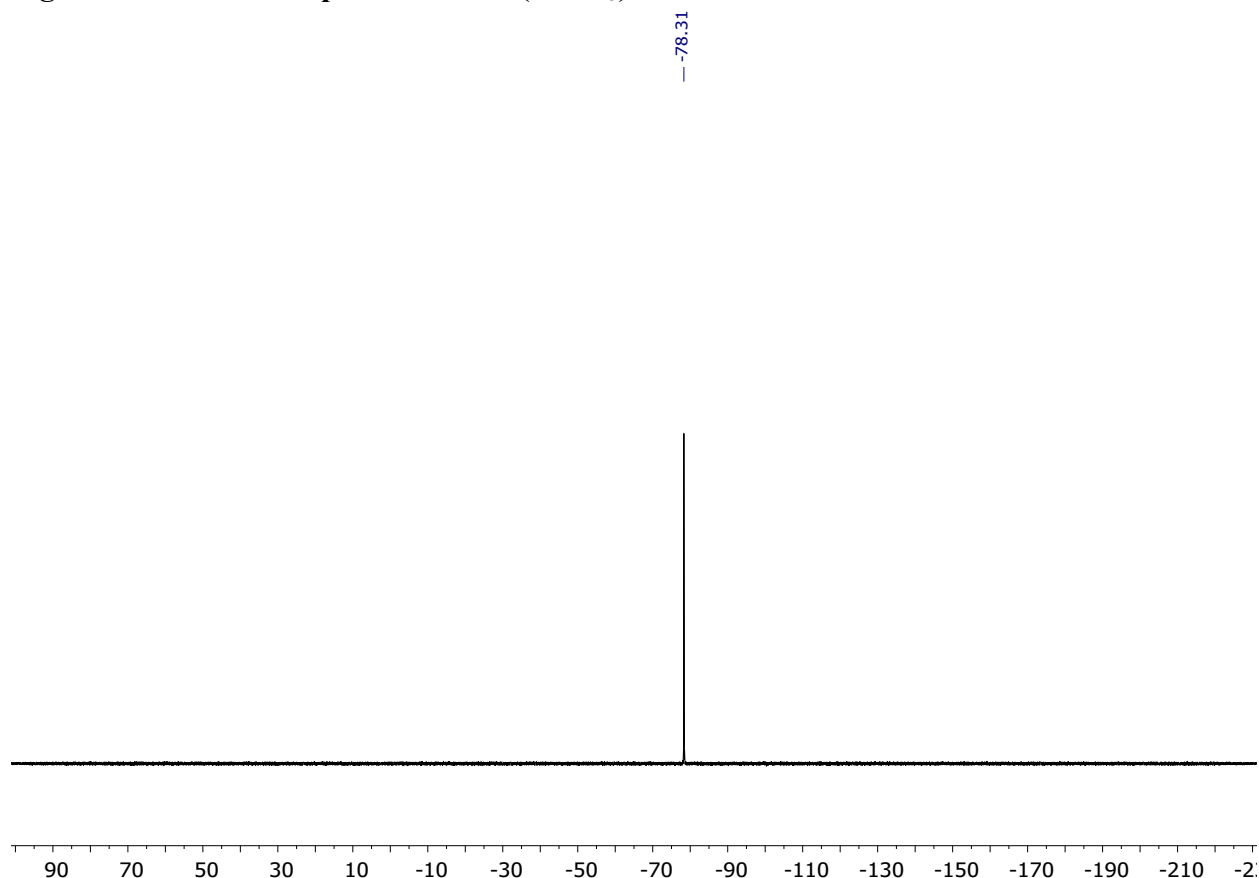

### Reaction of **7** with $\alpha$ -Methylstyrene (**11**)

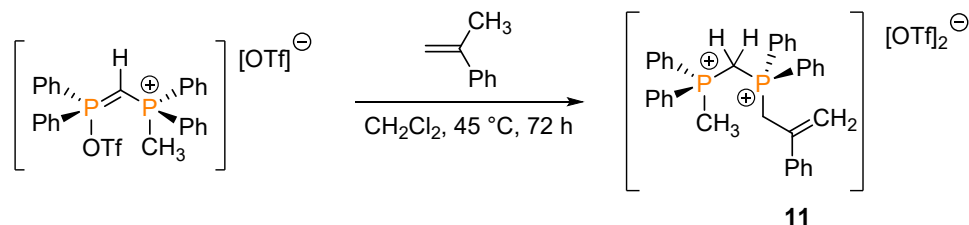

To a 0.7 mL DCM solution of **7** (36.3 mg, 0.0521 mmol, 1 equiv.) was added 6.7  $\mu\text{L}$  of  $\alpha$ -methylstyrene via syringe and the resultant mixture was transferred to a J-young tube. The reaction was heated at 45  $^{\circ}\text{C}$  for 72 hours, then brought into the glovebox and filtered over Celite to yield a colorless residue. NMR analysis indicated formation of **11**.

$^1\text{H}$  NMR (400 MHz,  $\text{CDCl}_3$ , 298 K)  $\delta$  7.86 – 7.61 (m, 15H), 7.60 – 7.38 (m, 10H), 5.41 (br d,  $^4J_{\text{HP}} = 6.1$  Hz, 1H), 5.31 (t,  $^2J_{\text{HP}} = 16.1$  Hz, 2H), 5.17 (br d,  $^4J_{\text{HP}} = 6.1$  Hz, 1H), 4.36 (d,  $^2J_{\text{HP}} = 15.2$  Hz, 2H), 2.23 (d,  $^2J_{\text{HP}} = 13.4$  Hz, 3H).

$^{13}\text{C}\{^1\text{H}\}$  NMR (126 MHz,  $\text{CDCl}_3$ , 298 K)  $\delta$  133.0 – 132.6 (m), 130.8 – 130.6 (m), 130.1 (d,  $J = 13.2$  Hz), 129.2 (d,  $J = 13.0$  Hz), 29.9.

Complete  $^{13}\text{C}\{^1\text{H}\}$  NMR spectrum could not be obtained due to low compound solubility.

$^{31}\text{P}\{^1\text{H}\}$  NMR (162 MHz,  $\text{CDCl}_3$ , 298K)  $\delta$  21.7 (d,  $^2J_{\text{PP}} = 19$  Hz, 1P), 20.0 (d,  $^2J_{\text{PP}} = 19$  Hz, 1P)

$^{19}\text{F}$  NMR (376 MHz,  $\text{CDCl}_3$ , 298 K)  $\delta$  -78.0 (s).

**Figure S39.**  $^1\text{H}$  NMR spectrum of the reaction of 7 with  $\alpha$ -Methylstyrene ( $\text{CDCl}_3$ ).

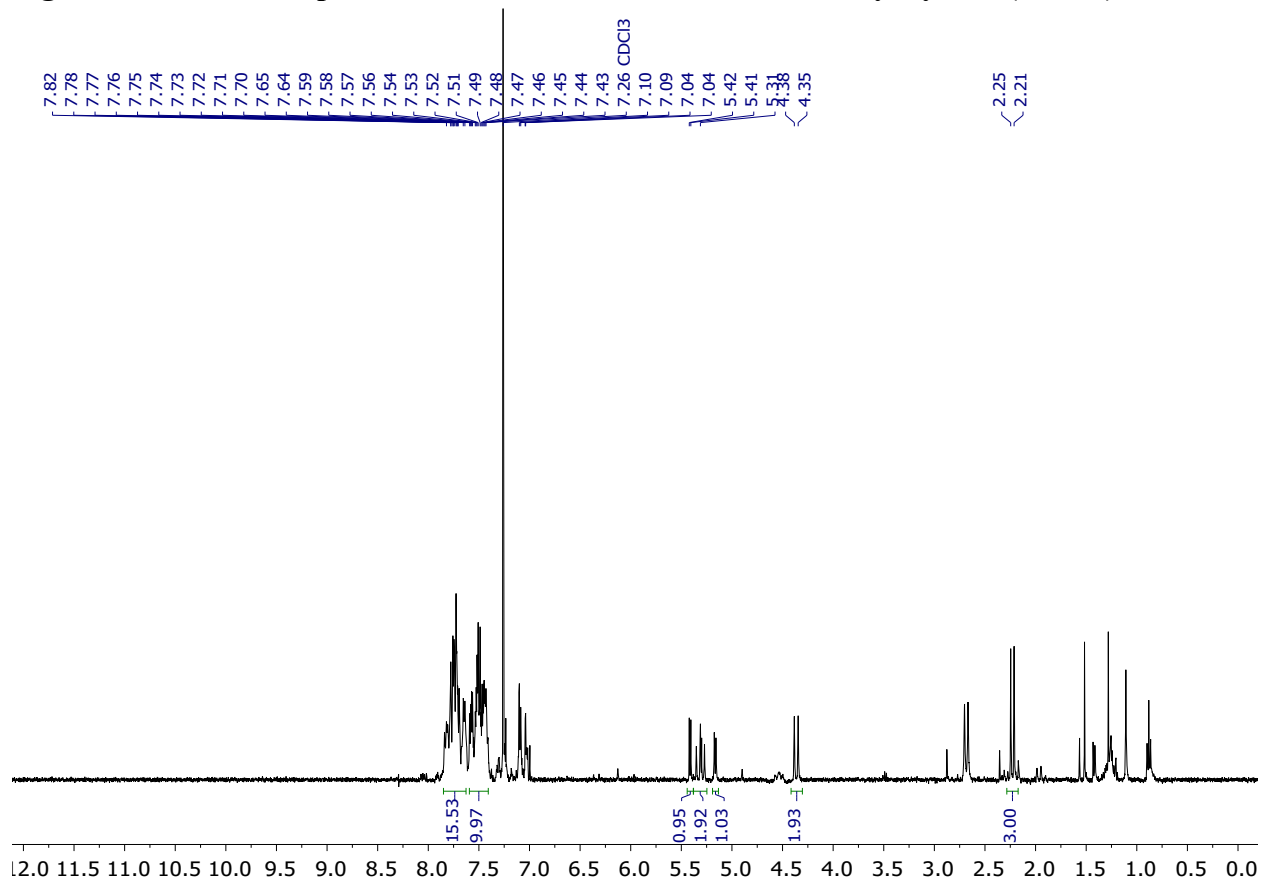

Figure S40.  $^{13}\text{C}\{^1\text{H}\}$  NMR spectrum of the reaction of 7 with  $\alpha$ -Methylstyrene ( $\text{CDCl}_3$ ).

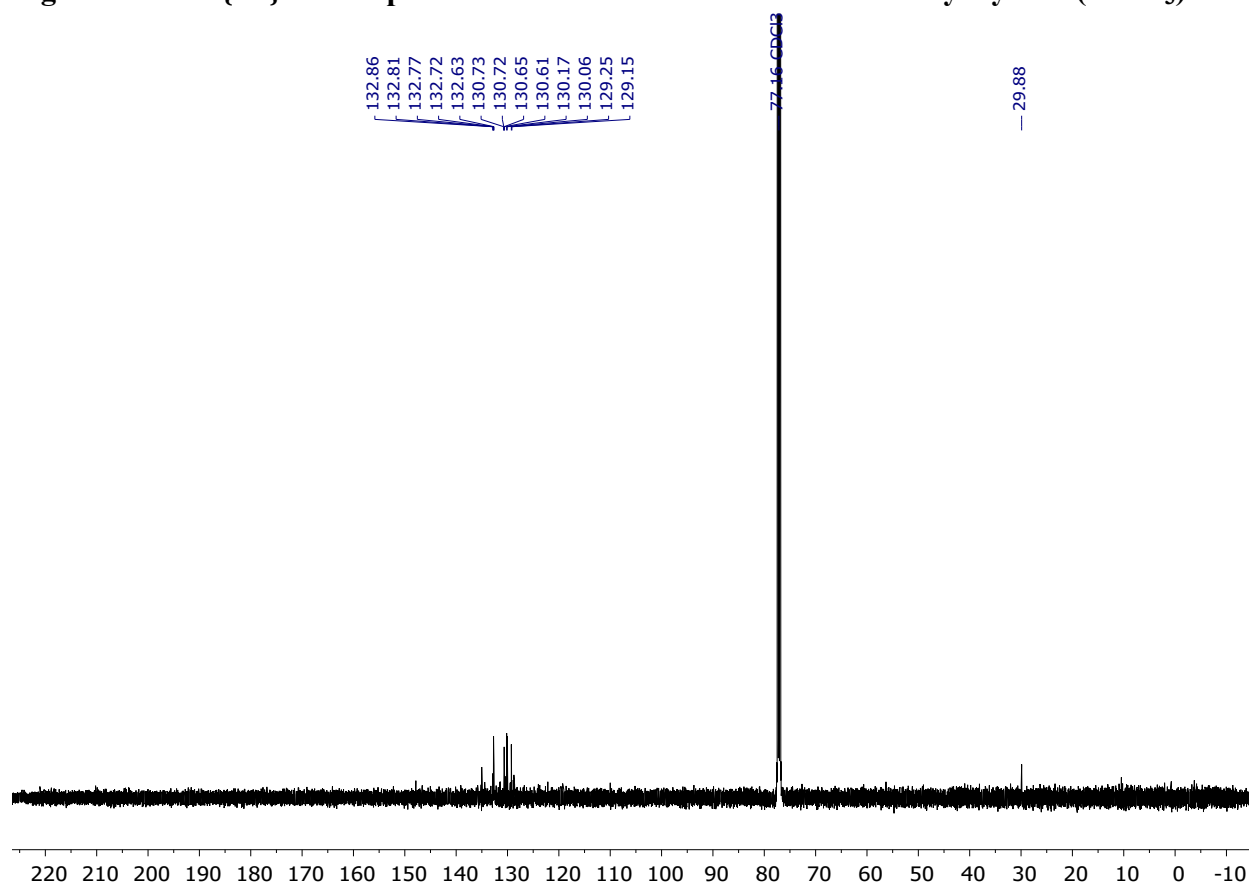

Figure S41.  $^{31}\text{P}\{^1\text{H}\}$  NMR spectrum of the reaction of 7 with  $\alpha$ -Methylstyrene ( $\text{CDCl}_3$ ).

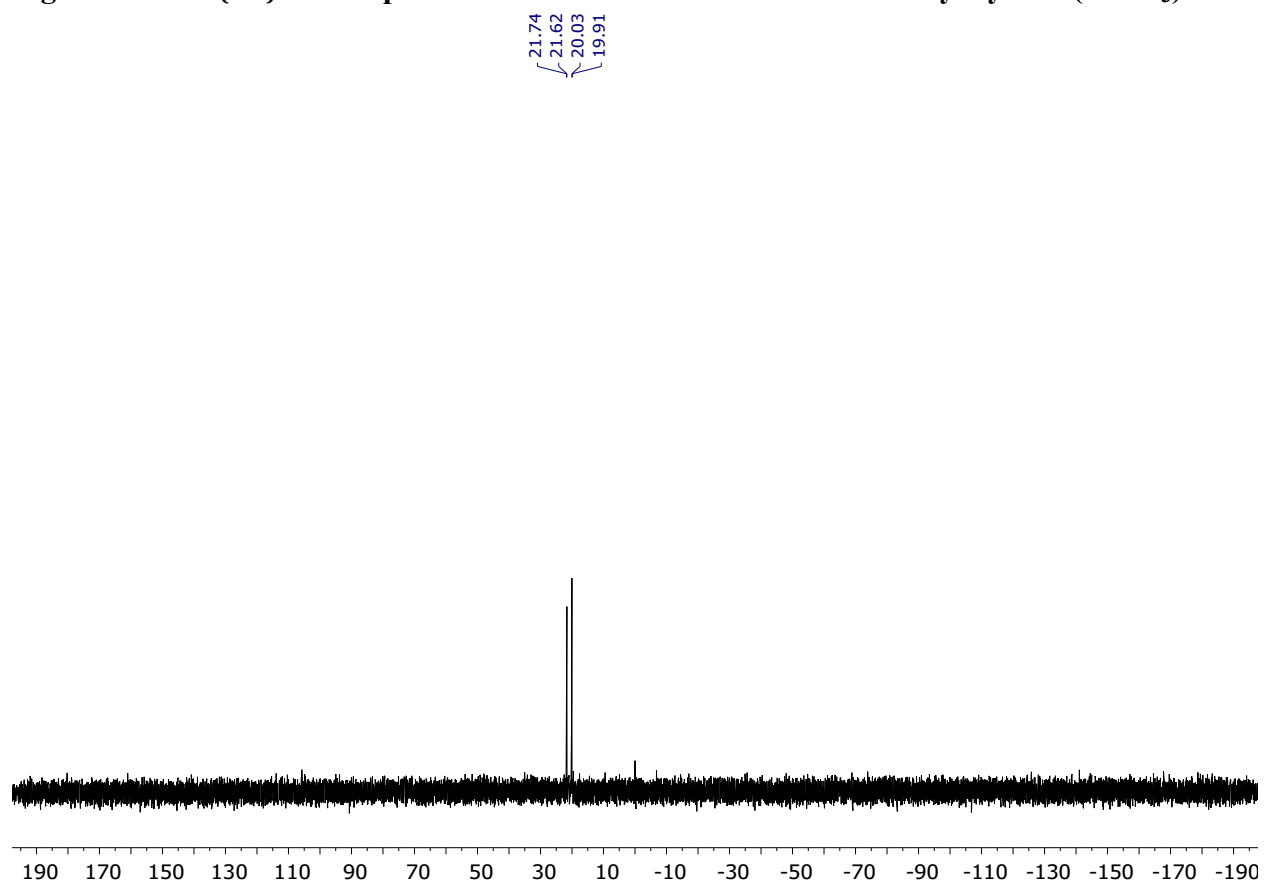

Figure S42.  $^{19}\text{F}$  NMR spectrum of the reaction of **7** with  $\alpha$ -Methylstyrene ( $\text{CDCl}_3$ ).

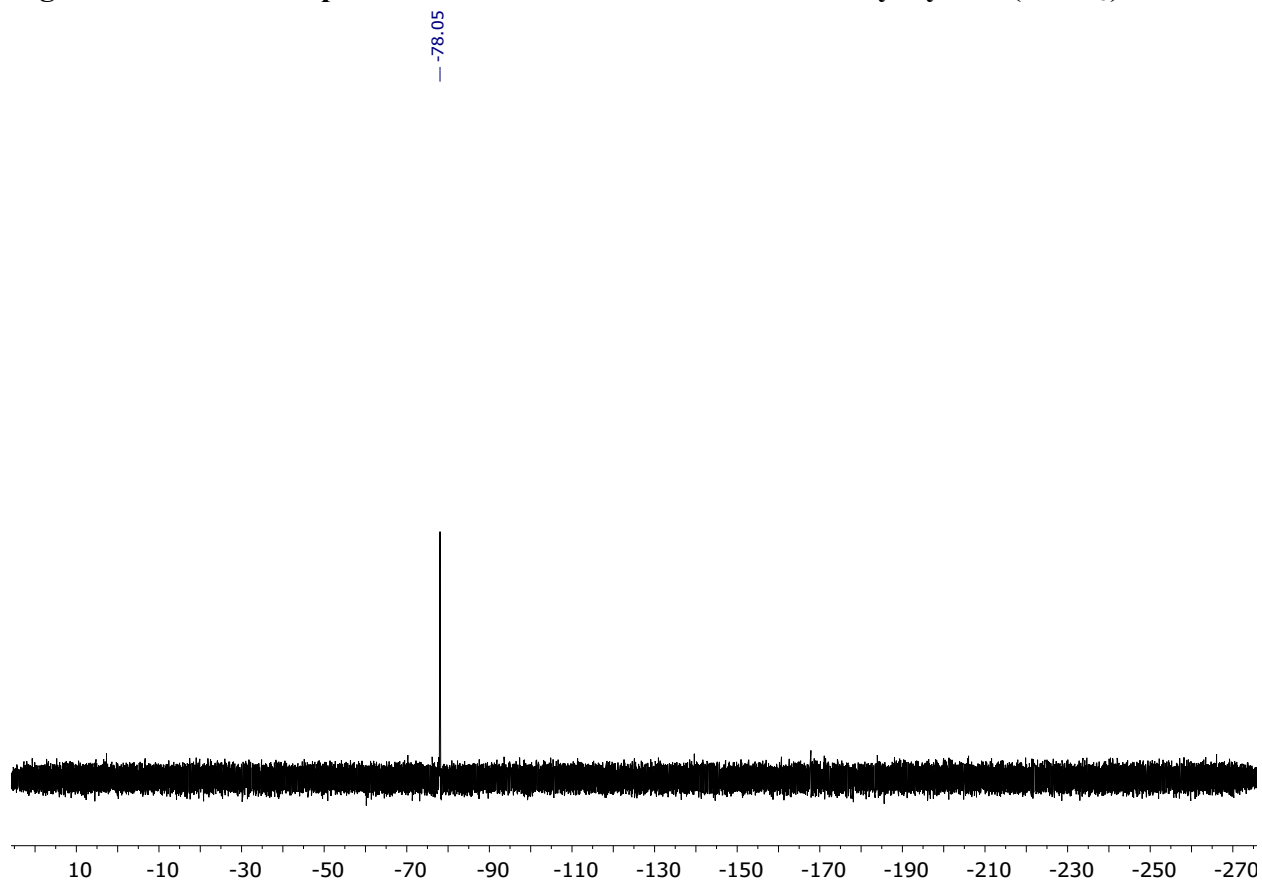

### Reaction of **7** with 2-Methylpropene (**12**)

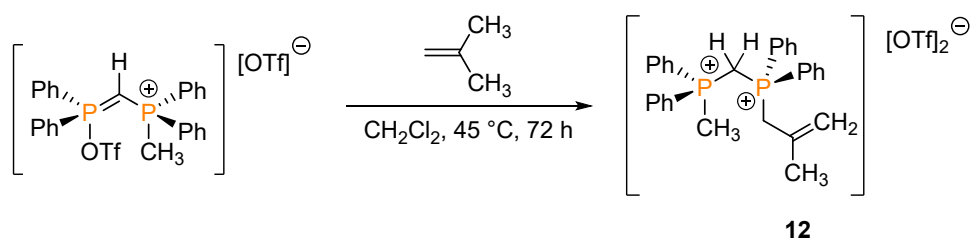

**7** (28.7 mg, 0.0412 mmol, 1 equiv.) was dissolved in 1 ml of DCM and transferred to a J-young tube. The solution was freeze-thaw degassed under vacuum; 2-methylpropene was then added at liquid  $\text{N}_2$  temperature ( $-196^\circ\text{C}$ ) and warmed up to room temperature (*ca.* 4 atm of 2-methylpropene). The reaction was heated at  $45^\circ\text{C}$  for 72 hours, then brought into the glovebox and filtered over Celite. The solvent was removed *in vacuo* leading to a white residue which was triturated with 3x3 mL pentane and dried under high vacuum to yield **12** as a white powder (27.0 mg, 0.0359 mmol, 87% yield).

X-ray quality crystal was obtained by layering a DCM solution of **12** with pentane and storing at  $-35^\circ\text{C}$ .

**$^1\text{H}$  NMR** (500 MHz,  $\text{CDCl}_3$ , 298 K)  $\delta$  7.92 – 7.37 (m, 20H), 5.30 (t,  $^2J_{\text{HP}} = 16.1$  Hz, 2H), 4.90 (br d,  $^4J_{\text{HP}} = 5.8$  Hz, 1H), 4.77 (br d,  $^4J_{\text{HP}} = 6.0$  Hz, 1H), 3.94 (d,  $^2J_{\text{HP}} = 15.4$  Hz, 2H), 2.41 (d,  $^2J_{\text{HP}} = 13.6$  Hz, 3H), 1.27 (d,  $^4J_{\text{HP}} = 3.0$  Hz, 3H).

**$^{13}\text{C}\{^1\text{H}\}$  NMR** (126 MHz,  $\text{CDCl}_3$ , 298 K) 136.2 (d,  $J = 3.0$  Hz), 135.7 (d,  $J = 2.8$  Hz), 134.3 (d,  $J = 10.3$  Hz), 132.8 (d,  $J = 11.2$  Hz), 131.8 (d,  $J = 10.5$  Hz), 130.6 (d,  $J = 13.0$  Hz), 130.5 (d,  $J = 13.5$  Hz), 122.3 – 121.8 (m), 117.3 (dd,  $J = 88.3, 3.0$  Hz), 114.2 (dd,  $J = 84.5, 2.1$  Hz), 32.4 (d,  $J = 46.2$  Hz), 24.0, 19.0 – 17.7 (m), 8.6 (d,  $J = 55.5$  Hz).

**$^{31}\text{P}\{^1\text{H}\}$  NMR** (162 MHz,  $\text{CDCl}_3$ , 298K)  $\delta$  21.4 (d,  $^2J_{\text{PP}} = 18$  Hz, 1P), 20.0 (d,  $^2J_{\text{PP}} = 18$  Hz, 1P).

**$^{19}\text{F}$  NMR** (376 MHz,  $\text{CDCl}_3$ , 298 K)  $\delta$  -78.4 (s).

**Figure S43.**  $^1\text{H}$  NMR spectrum of 12 ( $\text{CDCl}_3$ ).

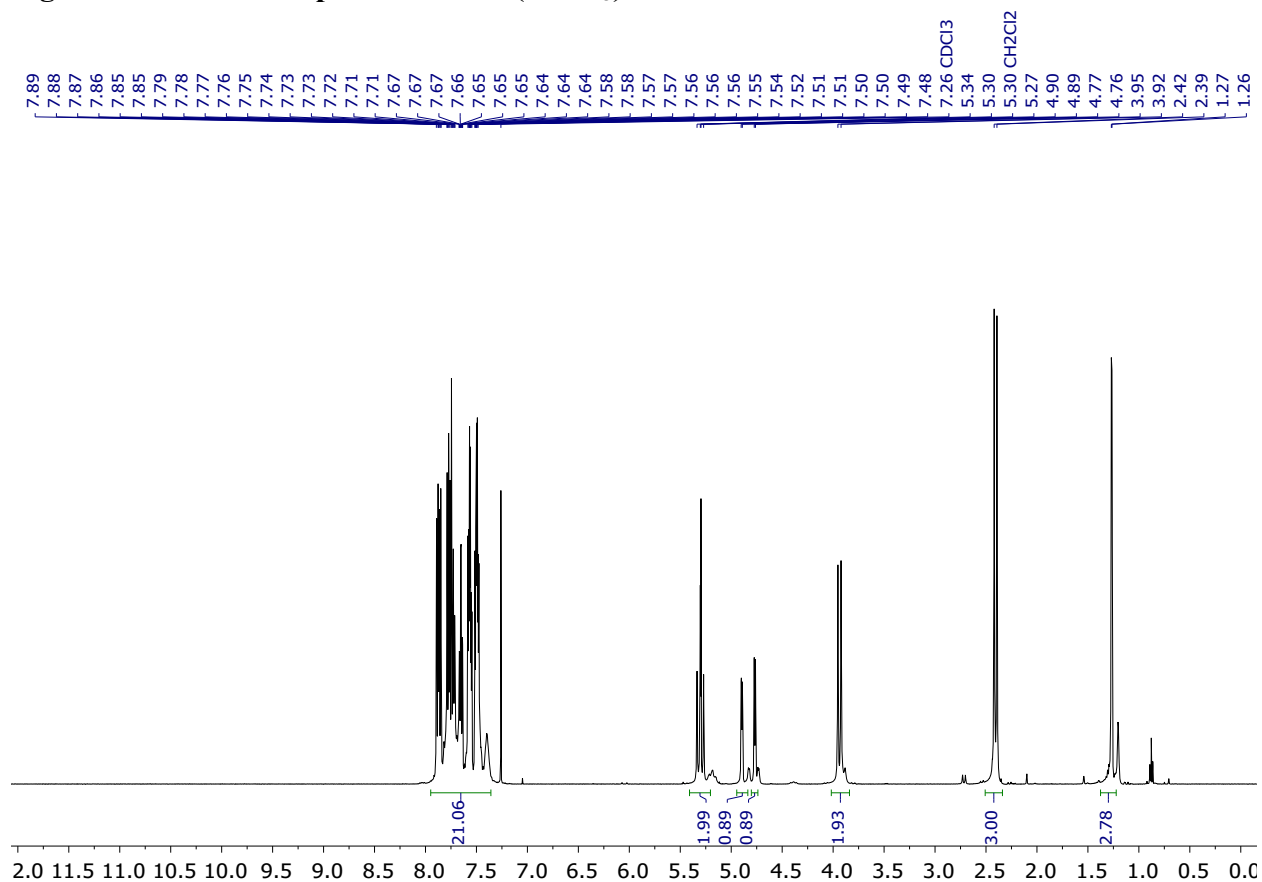

Figure S44.  $^{13}\text{C}\{^1\text{H}\}$  NMR spectrum of 12 ( $\text{CDCl}_3$ ).

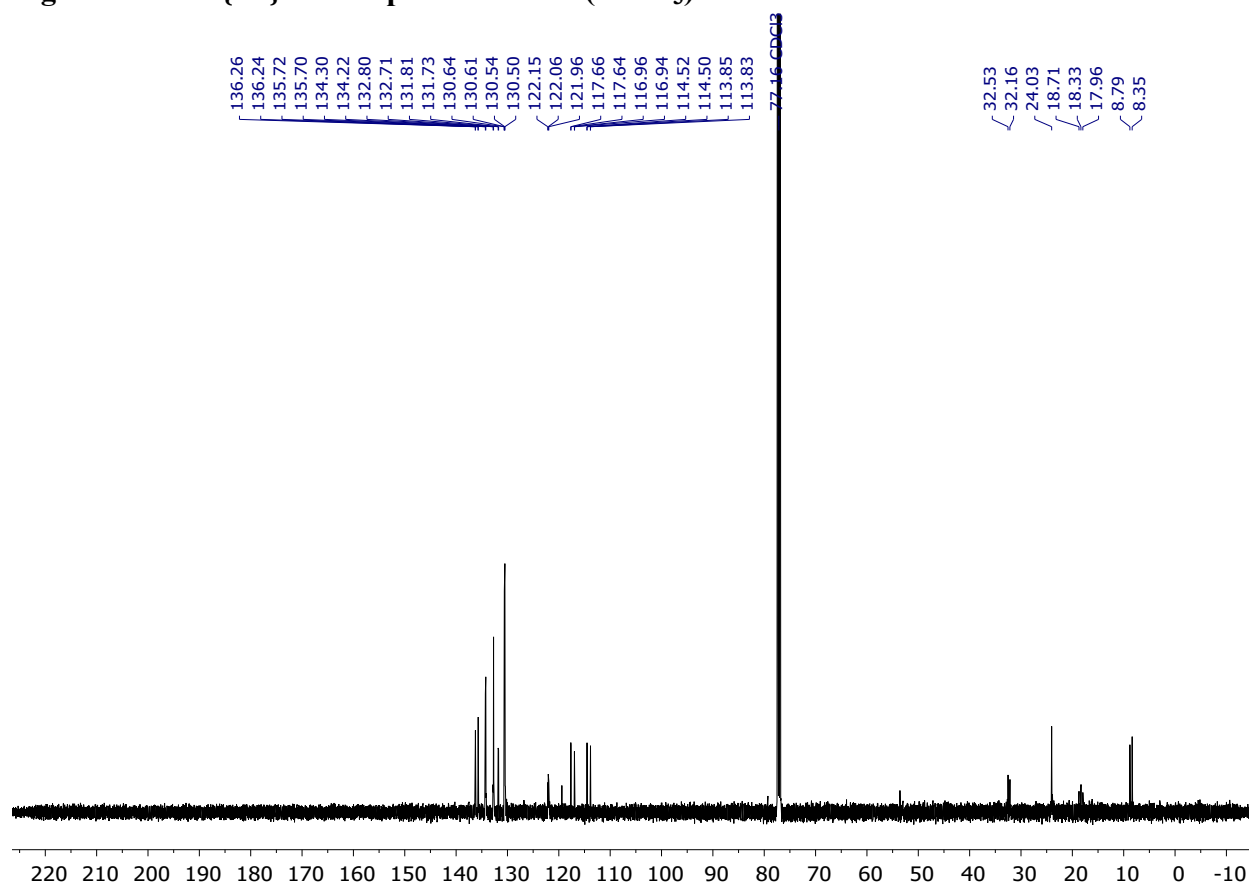



Figure S45.  $^{31}\text{P}\{^1\text{H}\}$  NMR spectrum of 12 ( $\text{CDCl}_3$ ).

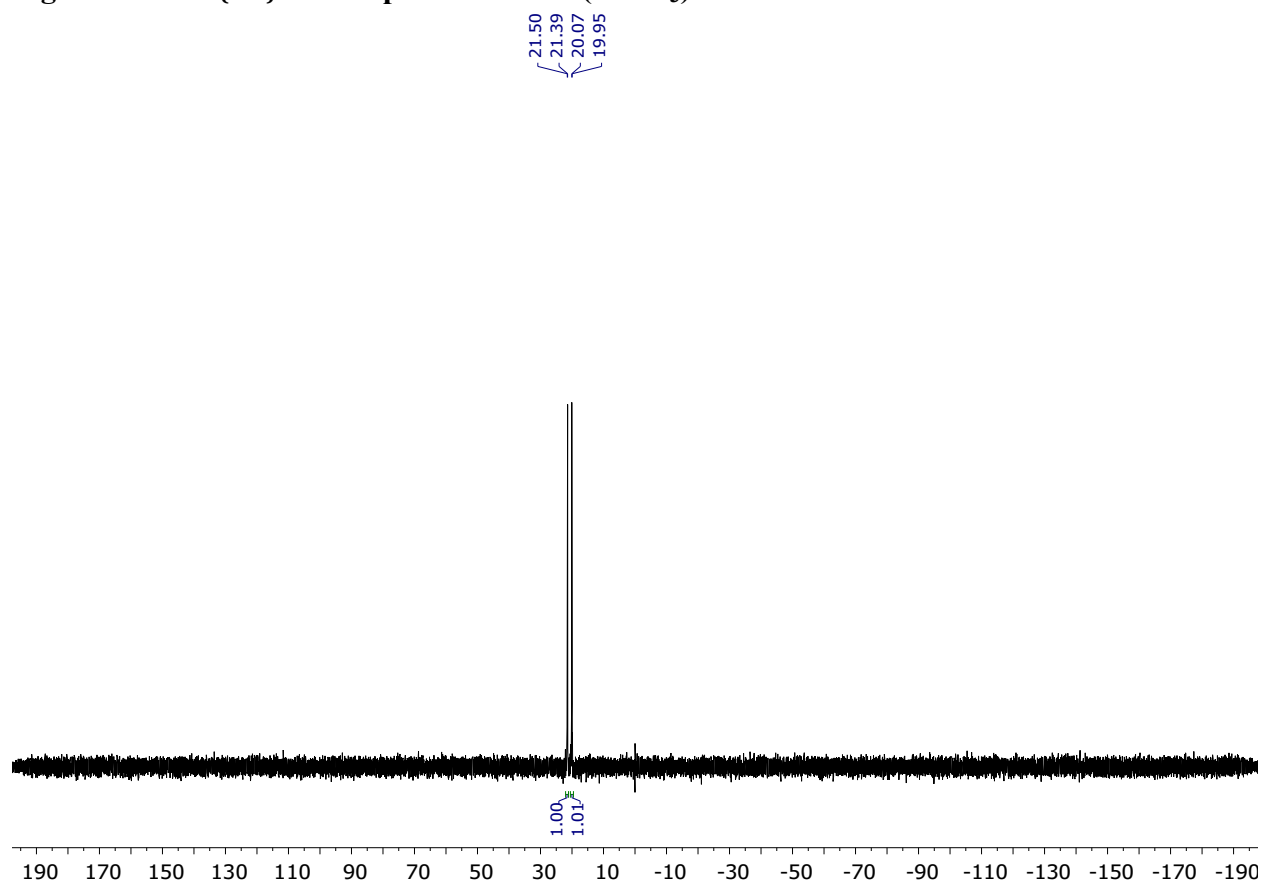

Figure S46.  $^{19}\text{F}$  NMR spectrum of 12 ( $\text{CDCl}_3$ ).

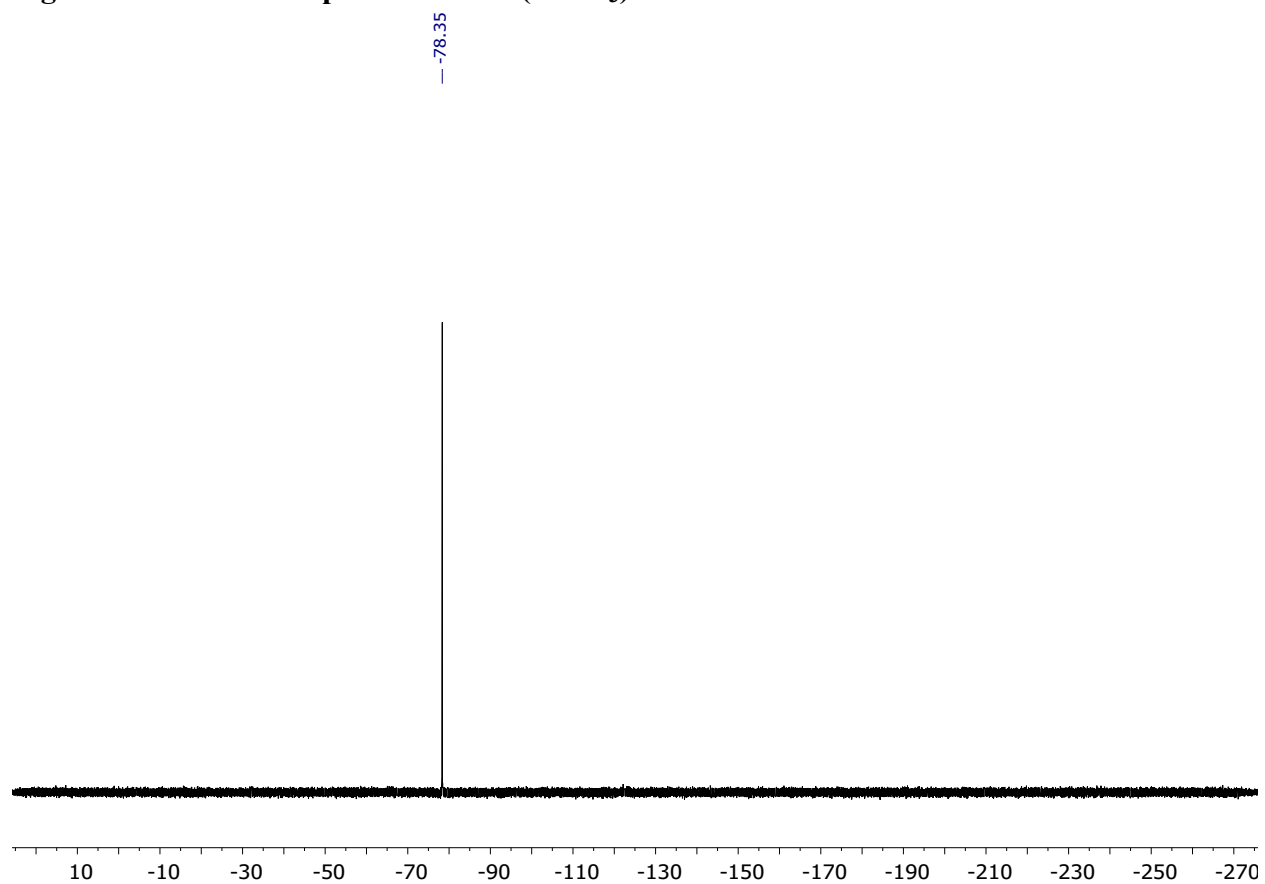

## References

1. K. Alam and A. F. Janzen, *J. Fluorine Chem.*, 1987, **36**, 179-184.
2. E. Fluck and R. Braun, *Phosphorus and Sulfur and the Related Elements*, 1988, **40**, 83-90.
3. S. J. Connelly, W. Kaminsky and D. M. Heinekey, *Organometallics*, 2013, **32**, 7478-7481.
4. R. E. H. Kuveke, L. Barwise, Y. van Ingen, K. Vashisth, N. Roberts, S. S. Chitnis, J. L. Dutton, C. D. Martin and R. L. Melen, *ACS Cent. Sci.*, 2022, DOI: 10.1021/acscentsci.2c00325.
5. R. M. Denton, J. An, B. Adeniran, A. J. Blake, W. Lewis and A. M. Poulton, *J. Org. Chem.*, 2011, **76**, 6749-6767.
6. S. M. Godfrey, C. A. McAuliffe, R. G. Pritchard, J. M. Sheffield and G. M. Thompson, *J. Chem. Soc., Dalton Trans.*, 1997, 4823-4828.
7. R. Appel, H.-F. Schöler and H.-D. Wihler, *Chem. Ber.*, 1979, **112**, 462-467.
